# Supplementary material for: Opportunities for advancing climate adaptation in Europe
Source: Research Square preprint supplement (doi:10.21203/rs.3.rs-7090828/v1), 2025-10-06
Supplement: Supplementary file 1 [file 19cec708d0603b4c7b2c2e5a.docx]

# **Supplementary Information for**

# **Opportunities for advancing climate adaptation in Europe**

This document includes

1. Definition of adaptation opportunity windows, list of opportunity window typologies, and associated literature
2. Plausible impact of opportunity window typologies on a pathways map
3. Reference list referring to all references used in Supplementary data 1 – Full list of identified adaptation opportunity windows

## 1. Definition of adaptation opportunity windows, list of opportunity window typologies, and associated literature

We here define an adaptation opportunity window as a period of time during which an adaptation measure, or a portfolio of measures, becomes (more) affordable, desirable and/or feasible, thus raising the potential for implementation. A measure becomes more *affordable* when it is cheaper to implement, either in absolute terms or in relation to costs of inaction. Alternatively, increase in affordability can also result from a larger set of resources being available for climate adaptation. A measure becomes more *desirable* when its social acceptance and desirability increases. A measure becomes more *feasible* when it becomes easier to implement, either technically or in terms of governance. An adaptation opportunity window is often temporary and will close after a certain period of time. If the measure(s) are not implemented within their opportunity window, the opportunity has been lost. Missing an opportunity does not mean that the measure(s) will never be implemented, but just that a window of particularly attractiveness, feasibility, affordability and/or acceptability has closed. Different factors can result in the opening of an opportunity window, leading to the identification of five typologies (examples from the literature in table 1 below):

- *Maintenance-driven*: opens owing to planned maintenance, end-of-life, or repair of existing risk-reduction measures;
- *Resource-driven*: opens when the benefits of an adaptation measure outweigh its costs (expressed in a positive net-present value), or after increased availability of financial (e.g. unlocking of funds) or natural (e.g. sand) resources;
- *Policy-driven*: opens after policy- and/or institutional arrangements, e.g. existing (inter)national and/or local policies (also outside the domain of climate adaptation), or the adoption of climate legislation;
- *Value-driven:* opens after changes in societal values and/or political context (e.g. change in government) and associated adaptation preferences and support. May include changes in beliefs about nature and/or severity of climate change or in risk perception and tolerance;
- *Innovation-driven*: opens owing to innovations in adaptation-related technologies and their mainstreaming and upscaling, following successful (local) piloting and/or decrease in costs. Innovative decision-making approaches may also fall under this typology.

*Table 1: Adaptation opportunity window typologies, their definition and associated literature.*

| **Opportunity** | **Literature findings on opportunity examples** | **Reference** |
| --- | --- | --- |
| Maintenance-driven | In urban areas, ‘normal’ maintenance, modification or renewal of infrastructure, buildings and public spaces provide an opportunity to reconsider the existing stormwater system. Mainstreaming method: using normal dynamics of urban areas a driver of adaptation. | Gersonius et al., 2012 |
| Every time maintenance or repair work is required for an existing measure, this is an opportunity to increase the effectiveness of such measure with (almost) no additional costs. | van de Ven et al., 2011 |
| When extreme event results in damage or full destruction of infrastructure, this provides an opportunity to reconstruct with additional resilience without a significant cost increase. | Birkmann et al., 2023 |
| Opportunity analysis revealed that when existing infrastructure reaches its end-of-life this opens a window of opportunity for mainstreaming of climate adaptation. | Koukoui et al., 2015 |
| Urban renewal mentioned as an example of an opportunity tipping point. | Haasnoot et al., 2019 |
| Resource-driven | Sufficient resourcing is identified as one of the key enablers of climate adaptation. | Brullo et al., 2024 |
| Sustainable economic development is a critical foundation of creating adaptation opportunities, because it can help build adaptive capacity of individuals and organizations.  Increasing awareness of the potential costs and benefits of adaptation options is an example of adaptation opportunity.  Capacity building in the form of resource provision is an example of adaptation opportunity. | IPCC, 2014 |
| Policy-driven | Implementation of specific policies creating conditions which favour climate adaptation implementation is an example of adaptation opportunity.  Mainstreaming climate adaptation into national development policies, regional and local planning, and economic development is an example of adaptation opportunity which was found to be relevant across regions.  Policy as key adaptation opportunity: e.g. in the form of spatial planning. Policy is the main adaptation opportunity in Europe. | IPCC, 2014 |
| Proactive leaders, governmental coordination, international support, and political stability are identified as key enablers of climate adaptation.  Conferences of parties, e.g. UNFCCC can become triggering events for an adaptation opportunity. | Brullo et al., 2024 |
| The coupling of separate problems, policies and politics streams can result in the opening of a policy window. Within this window, the problem at hand is recognized, policy solutions are available the the political climate allows for action. | Keskitalo et al., 2012 |
| Policy-innovators, or entrepreneurs, identified as one of the catalysing conditions for climate adaptation. | Solecki et al., 2025 |
| Value-driven | Awareness raising in general, and specifically increasing awareness of climate change and its consequences are examples of adaptation opportunity. | IPCC, 2014 |
| Adaptation knowledge and risk perspective identified as key enablers of climate adaptation.  People, institutions and organizations who perceive their climate risks to be high are most likely to take action to reduce their vulnerability. | Brullo et al., 2024 |
| Correlation exists between beliefs about nature and/or severity of climate change and support for climate policies. | Bliuc et al., 2015; Fairbrother, 2022 |
| Environmental values have been found to influence a person’s attitude towards adaptation actions. | Bremer & Linnenluecke, 2017 |
| In the context of describing positive social tipping points, public opinion and policy are presented as social tipping elements that can generate positive feedback, thereby triggering nonlinear rates of change. | Kopp et al., 2016 |
| Social acceptability and support can strongly influence the decision-making and the type and implementation of climate adaptation measures. | Mendizabal et al., 2021 |
| Innovation-driven | Innovation, including technological change, is an example of adaptation opportunity. | IPCC, 2014 |
| Increases in funding or energy crises can become triggering events for an adaptation opportunity. | Brullo et al., 2024 |
| A so-called ‘opportunity structure’ was identified to be a driver of institutional adaptation. | Patterson, 2021 |
| The utilization of new technologies and reduction in costs of existing innovations may facilitate the mainstreaming or upscaling of climate adaptation and is thus an opportunity. | Haasnoot et al., 2019 |

## 2. Plausible impact of opportunity window typologies on a pathways map

This section expands on results section titled ‘Leveraging opportunities within their window with adaptive pathways planning’. The identified adaptation opportunity windows are discussed through four ways in which opening of such windows can impact an existing adaptive plan, to determine whether different opportunity typologies could be associated with specific impacts on adaptive plans: advancing implementation of a measure, postponement of previously identified limit of a measure, widening of the solution space, and changes in priority ranking of different pathways alternatives.

*Innovation-driven opportunity windows* tend to enable widening of the solution space by showcasing the effectiveness of innovative measures, which may first not have been considered feasible. In few cases, postponement of adaptation limits may also be triggered by innovation-driven opportunities, when these are leveraged. Opportunities related to mainstreaming of amphibious and floating houses may for example allow inhabitants of flood-prone areas to safely remain in their homes for longer under increasing climate impacts, thereby postponing the need for retreat. Similarly, the innovative measure transitional polders may extend the lifetime of existing dikes through controlled dike broaches allowing for sediment deposition in between dikes (Weisscher et al., 2022).

*Resource-driven opportunity windows* also enable widening of the solutions space by allowing for reconsideration of measures which were first unaffordable. Alternatively, they may also anticipate implementation of measures before the limits of existing measures are reached, due to higher availability of resources at a specific moment in time. This may for example be the case in follow-up to extreme events (as e.g. in the 2021 Western European and 2023 Slovenian floods), when recovery funds may be available and destroyed flood protection schemes may be reconstructed with additional resilience and higher protection standards.

In some cases, *value-driven* and *policy-driven opportunity windows* can also trigger widening of the solution space, because changes in policies and values can weaken the importance of, for example, cost considerations. For similar reasons, *policy-driven opportunity windows* also often enable anticipation of implementation, as measures first planned for the long-term may be implemented earlier when these bring co-benefits which are in line with existing policies.

*Maintenance-driven opportunity windows* tend to facilitate either postponement of limits of existing measures or anticipation of implementation of future ones. The first may take place when planned maintenance is used to upgrade existing measures, thereby increasing their resilience to (future) climate impacts. The latter is relevant when planned maintenance or end-of-life are taken as an opportunity to substitute existing measures with alternative ones.

Finally, changes in pathways ranking are associated with *value- and policy-driven opportunity windows*, as these can change the weight given to pathways ranking indicators (e.g. environmental impact vs implementation costs), or even change the evaluation indicators altogether, due to e.g. policies in adaptation-related policy domains (e.g. biodiversity conservation or mitigation).

## Reference list

Birkmann, J., Schüttrumpf, H., Handmer, J., Thieken, A., Kuhlicke, C., Truedinger, A., Sauter, H., Klopries, E. M., Greiving, S., Jamshed, A., Merz, B., Solecki, W., & Kirschbauer, L. (2023). Strengthening resilience in reconstruction after extreme events – Insights from flood affected communities in Germany. *International Journal of Disaster Risk Reduction*, *96*, 103965. https://doi.org/10.1016/J.IJDRR.2023.103965

Bliuc, A.-M., McGarty, C., Thomas, E. F., Lala, G., Berndsen, M., & Misajon, R. (2015). Public division about climate change rooted in conflicting socio-political identities. *Nature Climate Change*, *5*(3), 226–229. https://doi.org/10.1038/nclimate2507

Bremer, J., & Linnenluecke, M. K. (2017). Determinants of the perceived importance of organisational adaptation to climate change in the Australian energy industry. *Australian Journal of Management*, *42*(3), 502–521. https://doi.org/10.1177/0312896216672273

Brullo, T., Barnett, J., Waters, E., & Boulter, S. (2024). The enablers of adaptation: A systematic review. *Npj Climate Action 2024 3:1*, *3*(1), 1–8. https://doi.org/10.1038/s44168-024-00128-y

Fairbrother, M. (2022). Public opinion about climate policies: A review and call for more studies of what people want. *PLOS Climate*, *1*(5), e0000030. https://doi.org/10.1371/journal.pclm.0000030

Gersonius, B., Nasruddin, F., Ashley, R., Jeuken, A., Pathirana, A., & Zevenbergen, C. (2012). Developing the evidence base for mainstreaming adaptation of stormwater systems to climate change. *Water Research*, *46*(20), 6824–6835. https://doi.org/10.1016/j.watres.2012.03.060

Haasnoot, M., Brown, S., Scussolini, P., Jimenez, J. A., Vafeidis, A. T., & Nicholls, R. J. (2019). Generic adaptation pathways for coastal archetypes under uncertain sea-level rise. *Environmental Research Communications*, *1*(7), 071006. https://doi.org/10.1088/2515-7620/ab1871

IPCC. (2014). Adaptation opportunities, constraints, and limits. In *Climate Change 2014: Impacts, Adaptation, and Vulnerability. Part A: Global and Sectoral Aspects.* (pp. 899–943). Cambridge University Press .

Keskitalo, E. C. H., Westerhoff, L., & Juhola, S. (2012). Agenda‐setting on the environment: the development of climate change adaptation as an issue in European states. *Environmental Policy and Governance*, *22*(6), 381–394. https://doi.org/10.1002/eet.1579

Kopp, R. E., Shwom, R. L., Wagner, G., & Yuan, J. (2016). Tipping elements and climate–economic shocks: Pathways toward integrated assessment. *Earth’s Future*, *4*(8), 346–372. https://doi.org/10.1002/2016EF000362

Koukoui, N., Gersonius, B., Schot, P. P., & van Herk, S. (2015). Adaptation tipping points and opportunities for urban flood risk management. *Journal of Water and Climate Change*, *6*(4), 695–710. https://doi.org/10.2166/wcc.2015.093

Mendizabal, M., Feliu, E., Tapia, C., Rajaeifar, M. A., Tiwary, A., Sepúlveda, J., & Heidrich, O. (2021). Triggers of change to achieve sustainable, resilient, and adaptive cities. *City and Environment Interactions*, *12*, 100071. https://doi.org/10.1016/j.cacint.2021.100071

Patterson, J. J. (2021). More than planning: Diversity and drivers of institutional adaptation under climate change in 96 major cities. *Global Environmental Change*, *68*, 102279. https://doi.org/10.1016/j.gloenvcha.2021.102279

Solecki, W., Orlove, B., & Bolgert, A. (2025). The Role of Catalysts in the Climate Adaptation Process. *WIREs Climate Change*, *16*(1). https://doi.org/10.1002/wcc.931

van de Ven, F. H. M., Gersonius, B., de Graaf, R., Luijendijk, E., & Zevenbergen, C. (2011). Creating water robust urban environments in the <scp>N</scp> etherlands: linking spatial planning, design and asset management using a three‐step approach. *Journal of Flood Risk Management*, *4*(4), 273–280. https://doi.org/10.1111/j.1753-318X.2011.01109.x

Weisscher, S. A. H., Baar, A. W., van Belzen, J., Bouma, T. J., & Kleinhans, M. G. (2022). Transitional polders along estuaries: Driving land-level rise and reducing flood propagation. *Nature-Based Solutions*, *2*, 100022. https://doi.org/10.1016/j.nbsj.2022.100022

## 3. Reference list relating to Supplementary data 1 – Full list of identified adaptation opportunity windows

Ashraf Vaghefi, S., Muccione, V., van Ginkel, K. C. H., & Haasnoot, M. (2021). Using Decision Making under Deep Uncertainty (DMDU) approaches to support climate change adaptation of Swiss Ski Resorts. *Environmental Science & Policy*, *126*, 65–78. https://doi.org/10.1016/J.ENVSCI.2021.09.005

Baca Aquatecture. (n.d.). *Amphibious House* . Retrieved April 25, 2025, from https://www.baca.uk.com/amphibioushouse.html

Bevacqua, E., Rakovec, O., Schumacher, D. L., Kumar, R., Thober, S., Samaniego, L., Seneviratne, S. I., & Zscheischler, J. (2024). Direct and lagged climate change effects intensified the 2022 European drought. *Nature Geoscience*, *17*(11), 1100–1107. https://doi.org/10.1038/s41561-024-01559-2

Biella, R., Shyrokaya, A., Ionita, M., Vignola, R., Sutanto, S., Todorovic, A., Teutschbein, C., Cid, D., Llasat, M. C., Alencar, P., Matanó, A., Ridolfi, E., Moccia, B., Pechlivanidis, I., van Loon, A., Wendt, D., Stenfors, E., Russo, F., Vidal, J.-P., … Tallaksen, L. M. (2024). *The 2022 Drought Needs to be a Turning Point for European Drought Risk Management*. https://doi.org/10.5194/egusphere-2024-2069

Birkmann, J., Schüttrumpf, H., Handmer, J., Thieken, A., Kuhlicke, C., Truedinger, A., Sauter, H., Klopries, E. M., Greiving, S., Jamshed, A., Merz, B., Solecki, W., & Kirschbauer, L. (2023). Strengthening resilience in reconstruction after extreme events – Insights from flood affected communities in Germany. *International Journal of Disaster Risk Reduction*, *96*, 103965. https://doi.org/10.1016/J.IJDRR.2023.103965

Blauhut, V., Stoelzle, M., Ahopelto, L., Brunner, M. I., Teutschbein, C., Wendt, D. E., Akstinas, V., Bakke, S. J., Barker, L. J., Bartošová, L., Briede, A., Cammalleri, C., Kalin, K. C., De Stefano, L., Fendeková, M., Finger, D. C., Huysmans, M., Ivanov, M., Jaagus, J., … Živković, N. (2022). Lessons from the 2018–2019 European droughts: a collective need for unifying drought risk management. *Natural Hazards and Earth System Sciences*, *22*(6), 2201–2217. https://doi.org/10.5194/nhess-22-2201-2022

Blue 21. (n.d.). *We get your project afloat*. Retrieved April 25, 2025, from https://www.blue21.nl/

Boiten raadgevende ingenieurs bv, & Factor Architecten bv. (2011). *Project review: Floating Homes “de Gouden Kust.”* https://ftp.science.ru.nl/toinesmits/course%20material%20IWM%202011/project%20review%20Maasbommel%202011.pdf

Borsje, B. W., van Wesenbeeck, B. K., Dekker, F., Paalvast, P., Bouma, T. J., van Katwijk, M. M., & de Vries, M. B. (2011). How ecological engineering can serve in coastal protection. *Ecological Engineering*, *37*(2), 113–122. https://doi.org/10.1016/j.ecoleng.2010.11.027

Brière, C., Janssen, S. K. H., Oost, A. P., Taal, M., & Tonnon, P. K. (2018). Usability of the climate-resilient nature-based sand motor pilot, The Netherlands. *Journal of Coastal Conservation*, *22*(3), 491–502. https://doi.org/10.1007/S11852-017-0527-3/TABLES/2

Cavalcante, L., Pot, W., van Oel, P., Kchouk, S., Neto, G. R., & Dewulf, A. (2023). From creeping crisis to policy change: The adoption of drought preparedness policy in Brazil. *Water Policy*, *25*(10), 949–965. https://doi.org/10.2166/wp.2023.073

Cheong, S.-M., Silliman, B., Wong, P. P., van Wesenbeeck, B., Kim, C.-K., & Guannel, G. (2013). Coastal adaptation with ecological engineering. *Nature Climate Change*, *3*(9), 787–791. https://doi.org/10.1038/nclimate1854

ClientEarth. (2023). *Key deadlines under the Water Framework Directive* . https://www.clientearth.org/media/br0pedp4/clientearth-legal-paper_key-deadlines-under-the-wfd.pdf

Climate ADAPT. (2016a, June 7). *Adaptation Option - Floating and amphibious housing*. https://climate-adapt.eea.europa.eu/en/metadata/adaptation-options/floating-and-amphibious-housing

Climate ADAPT. (2016b, June 7). *Case Studies - Amphibious housing in Maasbommel, the Netherlands*.

Climate ADAPT. (2016c, June 7). *Case Studies:  Isar-Plan – Water management plan and restoration of the Isar river, Munich (Germany)*. https://climate-adapt.eea.europa.eu/en/metadata/case-studies/isar-plan-2013-water-management-plan-and-restoration-of-the-isar-river-munich-germany

Climate Change Advisory Council (2023). *Terms of reference of the Adaptation Committee.* https://www.climatecouncil.ie/media/climatechangeadvisorycouncil/contentassets/documents/governance/Adaptation%20Committee%20Terms%20of%20Reference%202023.pdf

Climate Change Advisory Council (n.d.). *Adaptation Committee.* Retrieved April 25, 2025, from https://www.climatecouncil.ie/aboutthecouncil/adaptationcommittee/

Climate Change Committee (n.d.). *About the Climate Change Committee.* Retrieved on April 25, 2025, from https://www.theccc.org.uk/about/

Coen, L., Brumbaugh, R., Bushek, D., Grizzle, R., Luckenbach, M., Posey, M., Powers, S., Tolley, S. (2007). Ecosystem services related to oyster restoration. *Marine Ecology Progress Series*, 341, 303-307.

CropXR. (n.d.). *Making crops more resilient, sustainable, and climate-adapted*. Retrieved April 25, 2025, from https://cropxr.org/

De Vries, M., Bouma, T., van Katwijk, M., Borsje, B., van Wesenbeeck, B. (2007). *Biobouwers van de kunst*. Delft, the Netherlands.

Dottori, F., Mentaschi, L., Bianchi, A., Alfieri, L., & Feyen, L. (2023). Cost-effective adaptation strategies to rising river flood risk in Europe. *Nature Climate Change*, *13*(2), 196–202. https://doi.org/10.1038/s41558-022-01540-0

Eems Dollard 2050. (n.d.). *Pilot dubbele dijk* . Retrieved October 28, 2024, from https://eemsdollard2050.nl/project/dubbele-dijk/

European Commission. (n.d.-a). *Floods* . Retrieved April 24, 2025, from https://environment.ec.europa.eu/topics/water/floods_en

European Commission. (n.d.-b). *The Habitats Directive*. Retrieved April 24, 2025, from https://environment.ec.europa.eu/topics/nature-and-biodiversity/habitats-directive_en

European Commission. (n.d.-c). *Water Framework Directive* . Retrieved August 13, 2024, from https://environment.ec.europa.eu/topics/water/water-framework-directive_en

European Commission. (2021). *Report from the Commission to the Council and the European Parliament on the implementation of the Water Framework Directive (2000/60/EC), the Environmental Quality Standards Directive (2008/105/EC amended by Directive 2013/39/EU) and the Floods Directive (2007/60/EC)*. https://eur-lex.europa.eu/legal-content/EN/TXT/PDF/?uri=CELEX:52021DC0970

European Commission: Joint Research Centre, Nauwelaers, C., Gnamus, A., & Harding, R. (2025). Peer reviews on transformative innovation for climate change adaptation – The national case – Slovenia. *Publications Office of the European Union*.

European Environmental Agency. (2021, November 18). *Ecological status of surface waters in Europe*. https://www.eea.europa.eu/en/analysis/indicators/ecological-status-of-surface-waters?activeAccordion=

European Parliament. (n.d.). *Comparative Tool*. Retrieved March 17, 2025, from https://results.elections.europa.eu/en/tools/comparative-tool/

European Scientific Advisory Board on Climate Change (n.d.). *The European Scientific Advisory Board on Climate Change.* Retrieved April 25, 2025, from https://climate-advisory-board.europa.eu/

Expertenpanel Hoogwaterbeveiliging. (2022). *Weerbaar Waterland Ons voorbereiden op wat al gebeurt*. https://vmm.vlaanderen.be/nieuws/advies-weerbaar-waterland.pdf

Expertenrat fur Klimafragen. (n.d.). *The Council of Experts on Climate Change*. Retrieved April 24, 2025, from https://expertenrat-klima.de/en/about-us/

Garside, S., & Zhai, H. (2022). If not now, when? Climate disaster and the Green vote following the 2021 Germany floods. *Research & Politics*, *9*(4). https://doi.org/10.1177/20531680221141523

Giupponi, C., Bidoia, M., Breil, M., Di Corato, L., Gain, A. K., Leoni, V., Minooei Fard, B., Pesenti, R., & Umgiesser, G. (2024). Boon and burden: economic performance and future perspectives of the Venice flood protection system. *Regional Environmental Change*, *24*(2), 44. https://doi.org/10.1007/s10113-024-02193-9

Goedefroo, N., Benham, P., Debusschere, E., Deneudt, K., Mascart, T., Semeraro, A., Sterckx, T., & Van Hoey, G. (2022). Nature-based solutions in a sandy foreshore: A biological assessment of a longline mussel aquaculture technique to establish subtidal reefs. *Ecological Engineering*, *185*, 106807. https://doi.org/10.1016/j.ecoleng.2022.106807

Gov.UK. (n.d.). *Guidance - The Thames Barrier* . 2014. Retrieved April 24, 2025, from https://www.gov.uk/guidance/the-thames-barrier

Haasnoot, M., Kwadijk, J., van Alphen, J., Le Bars, D., van den Hurk, B., Diermanse, F., van der Spek, A., Essink, G. O., Delsman, J., & Mens, M. (2020). Adaptation to uncertain sea-level rise; how uncertainty in Antarctic mass-loss impacts the coastal adaptation strategy of the Netherlands. *Environmental Research Letters*, *15*(3), 034007. https://doi.org/10.1088/1748-9326/ab666c

Hall, J. W., Harvey, H., & Manning, L. J. (2019). Adaptation thresholds and pathways for tidal flood risk management in London. *Climate Risk Management*, *24*, 42–58. https://doi.org/10.1016/j.crm.2019.04.001

Hanasaki, N., Yoshikawa, S., Kakinuma, K., & Kanae, S. (2016). A seawater desalination scheme for global hydrological models. *Hydrology and Earth System Sciences*, *20*(10), 4143–4157. https://doi.org/10.5194/hess-20-4143-2016

Haut Conseil pour le Climat. (n.d.). *About* . Retrieved April 24, 2025, from https://www.hautconseilclimat.fr/en/about/

Havet, A., Coquil, X., Fiorelli, J. L., Gibon, A., Martel, G., Roche, B., Ryschawy, J., Schaller, N., & Dedieu, B. (2014). Review of livestock farmer adaptations to increase forages in crop rotations in western France. *Agriculture, Ecosystems & Environment*, *190*, 120–127. https://doi.org/10.1016/j.agee.2014.01.009

Hendel, M., & Royon, L. (2015). The effect of pavement-watering on subsurface pavement temperatures. *Urban Climate*, *14*, 650–654. https://doi.org/10.1016/j.uclim.2015.10.006

International Climate Councils Network. (n.d.). *Members*. Retrieved April 24, 2025, from https://www.climatecouncils.org/members/

IPCC. (2023a). Cities and Settlements by the Sea. In *Climate Change 2022 – Impacts, Adaptation and Vulnerability* (pp. 2163–2194). Cambridge University Press. https://doi.org/10.1017/9781009325844.019

IPCC. (2023b). Europe. In *Climate Change 2022 – Impacts, Adaptation and Vulnerability* (pp. 1817–1928). Cambridge University Press. https://doi.org/10.1017/9781009325844.015

IPCC. (2023c). Water. In *Climate Change 2022 – Impacts, Adaptation and Vulnerability* (pp. 551–712). Cambridge University Press. https://doi.org/10.1017/9781009325844.006

Islam, M., Semeraro, A., Langedock, K., Moulaert, I., Stratigaki, V., Sterckx, T., & Van Hoey, G. (2024). Inducing mussel beds, based on an aquaculture long-line system, as nature-based solutions: Effects on seabed dynamics and benthic communities. *Nature-Based Solutions*, *6*, 100142. https://doi.org/10.1016/j.nbsj.2024.100142

Jensen, L. (2025). *Slovenia’s climate action strategy* . https://www.europarl.europa.eu/thinktank/en/document/EPRS_BRI(2025)769559

Jones, E., Qadir, M., van Vliet, M. T. H., Smakhtin, V., & Kang, S. mu. (2019). The state of desalination and brine production: A global outlook. *Science of The Total Environment*, *657*, 1343–1356. https://doi.org/10.1016/J.SCITOTENV.2018.12.076

Keskitalo, E. C. H., Westerhoff, L., & Juhola, S. (2012). Agenda‐setting on the environment: the development of climate change adaptation as an issue in European states. *Environmental Policy and Governance*, *22*(6), 381–394. https://doi.org/10.1002/eet.1579

Klimaradet. (n.d.). *About the Danish Council on Climate Change*. Retrieved April 24, 2025, from https://klimaraadet.dk/en/about-danish-council-climate-change

Knutzen, F., Averbeck, P., Barrasso, C., Bouwer, L. M., Gardiner, B., Grünzweig, J. M., Hänel, S., Haustein, K., Johannessen, M. R., Kollet, S., Müller, M. M., Pietikäinen, J.-P., Pietras-Couffignal, K., Pinto, J. G., Rechid, D., Rousi, E., Russo, A., Suarez-Gutierrez, L., Veit, S., … Gliksman, D. (2025). Impacts on and damage to European forests from the 2018–2022 heat and drought events. *Natural Hazards and Earth System Sciences*, *25*(1), 77–117. https://doi.org/10.5194/nhess-25-77-2025

Koundouri, P. (2023). COMMENT Urgent call for comprehensive governmental climate action against wildfires in Greece. *Npj Clim. Action*, *42*(2). https://doi.org/10.1038/s44168-023-00076-z

Kreibich, H., Van Loon, A. F., Schröter, K., Ward, P. J., Mazzoleni, M., Sairam, N., Abeshu, G. W., Agafonova, S., AghaKouchak, A., Aksoy, H., Alvarez-Garreton, C., Aznar, B., Balkhi, L., Barendrecht, M. H., Biancamaria, S., Bos-Burgering, L., Bradley, C., Budiyono, Y., Buytaert, W., … Di Baldassarre, G. (2022). The challenge of unprecedented floods and droughts in risk management. *Nature*, *608*(7921), 80–86. https://doi.org/10.1038/s41586-022-04917-5

Kwadijk, J. C. J., Haasnoot, M., Mulder, J. P. M., Hoogvliet, M. M. C., Jeuken, A. B. M., van der Krogt, R. A. A., van Oostrom, N. G. C., Schelfhout, H. A., van Velzen, E. H., van Waveren, H., & de Wit, M. J. M. (2010). Using adaptation tipping points to prepare for climate change and sea level rise: a case study in the Netherlands. *WIREs Climate Change*, *1*(5), 729–740. https://doi.org/10.1002/wcc.64

Lehner, B., Liermann, C. R., Revenga, C., Vörösmarty, C., Fekete, B., Crouzet, P., Döll, P., Endejan, M., Frenken, K., Magome, J., Nilsson, C., Robertson, J. C., Rödel, R., Sindorf, N., & Wisser, D. (2011). High‐resolution mapping of the world’s reservoirs and dams for sustainable river‐flow management. *Frontiers in Ecology and the Environment*, *9*(9), 494–502. https://doi.org/10.1890/100125

Lincke, D., & Hinkel, J. (2018). Economically robust protection against 21st century sea-level rise. *Global Environmental Change*, *51*, 67–73. https://doi.org/10.1016/j.gloenvcha.2018.05.003

Lincke, D., & Hinkel, J. (2021). Coastal Migration due to 21st Century Sea‐Level Rise. *Earth’s Future*, *9*(5). https://doi.org/10.1029/2020EF001965

Loftslagsrad - Icelandic Climate Council. (n.d.-a). *ICELANDIC CLIMATE COUNCIL*. Retrieved April 24, 2025, from https://loftslagsrad.is/english/climate-council/

Loftslagsrad - Icelandic Climate Council. (n.d.-b). *THE ROLE AND OBJECTIVE OF THE COUNCIL*. Retrieved April 24, 2025, from https://loftslagsrad.is/english/role-and-objective/

Martínez-Fernández, J. (2009). *Ventajas e inconvenientes ambientales y sociales de la desalación? Actas de las Jornadas sobre Desalación*.

Morote, Á. F., Rico, A. M., & Moltó, E. (2017). Critical review of desalination in Spain: a resource for the future? *Geographical Research*, *55*(4), 412–423. https://doi.org/10.1111/1745-5871.12232

MOSE Venezia. (n.d.). *Il sistema MOSE - Le barriere mobili per la protezione dalle acque alte*. Retrieved April 24, 2025, from https://mosevenezia.eu/progetto/

Nationella Expertrared for Klimatanpassning (n.d.). *Swedish Expert Council on Climate Adaptation.* Retrieved April 25, 2025, from https://klimatanpassningsradet.se/in-english

Navarro, T. (2012). Cuestiones jurídico-ambientales de la reutilización de aguas regeneradas (Environmental and legal issues with respect to reclaimed wáter). In *Agua Y Ciudades (Water and Cities)* (pp. 389–427).

Navarro, T. (2018). Water reuse and desalination in Spain – challenges and opportunities. *Journal of Water Reuse and Desalination*, *8*(2), 153–168. https://doi.org/10.2166/wrd.2018.043

Netherlands Water Partnership. (2023, December 22). *The Maeslant storm surge barrier, the largest moveable object in the world, was closed last night for the first time*. https://www.netherlandswaterpartnership.com/news/maeslant-storm-surge-barrier-largest-moveable-object-world-was-closed-last-night-first-time

NL2120. (n.d.). *Elevating Nature-based Solutions* . Retrieved April 8, 2025, from https://www.nl2120.nl/

North Norfolk District Council. (n.d.). *Bacton to Walcott Coastal Management* . Retrieved April 8, 2025, from https://www.north-norfolk.gov.uk/sandscaping

OECD. (2024). *Taming wildfires in the context of climate change: The Case of Greece* . https://www.oecd.org/content/dam/oecd/en/publications/reports/2024/06/taming-wildfires-in-the-context-of-climate-change-the-case-of-greece_754f2c60/cfb797a7-en.pdf

Penning-Rowsell, E. (2020). Floating architecture in the landscape: climate change adaptation ideas, opportunities and challenges. *Landscape Research*, *45*(4), 395–411. https://doi.org/10.1080/01426397.2019.1694881

Penning-Rowsell, E. C., Haigh, N., Lavery, S., & McFadden, L. (2013). A threatened world city: the benefits of protecting London from the sea. *Natural Hazards*, *66*(3), 1383–1404. https://doi.org/10.1007/s11069-011-0075-3

Pineda-Metz, S. E. A., Colsoul, B., Niewöhner, M., Hausen, T., Peter, C., & Pogoda, B. (2023). Setting the stones to restore and monitor European flat oyster reefs in the German North Sea. *Aquatic Conservation: Marine and Freshwater Ecosystems*, *33*(7), 661–677. https://doi.org/10.1002/AQC.3945

ReGeNL. (n.d.). *Naar een rendabele regeneratieve landbouw* . Retrieved April 8, 2025, from https://regenl.nl/

Rijksoverheid. (n.d.). *Doel Nationaal Groeifonds*. Retrieved April 8, 2025, from https://www.nationaalgroeifonds.nl/doel-nationaal-groeifonds

Rijkswaterstaat. (n.d.). *Maeslant Barrier* . Retrieved April 24, 2025, from https://www.rijkswaterstaat.nl/en/projects/iconic-structures/maeslant-barrier

Rodríguez-Sinobas, L., Zubelzu, S., Perales-Momparler, S., & Canogar, S. (2018). Techniques and criteria for sustainable urban stormwater management. The case study of Valdebebas (Madrid, Spain). *Journal of Cleaner Production*, *172*, 402–416. https://doi.org/10.1016/j.jclepro.2017.10.070

Roth, D., & Winnubst, M. (2014). Moving out or living on a mound? Jointly planning a Dutch flood adaptation project. *Land Use Policy*, *41*, 233–245. https://doi.org/10.1016/j.landusepol.2014.06.001

Rotterdam Make it Happen. (n.d.). *Sustainable Floating Homes* . Retrieved April 25, 2025, from https://rotterdammakeithappen.nl/en/showcases/sustainable-floating-homes/

Royal HaskoningDHV. (n.d.). *A UK first - sandscaping: building with nature in Bacton, Norfolk*. Retrieved April 25, 2025, from https://www.royalhaskoningdhv.com/en/projects/a-uk-first-sandscaping-building-with-nature-in-bacton-norfolk

Sabin Center for Climate Change Law. (2025). *Association of Swiss Senior Women for Climate Protection v. Federal Department of the Environment Transport, Energy and Communications (DETEC) and Others*. https://climatecasechart.com/non-us-case/union-of-swiss-senior-women-for-climate-protection-v-swiss-federal-parliament/

Sabin Centre for Climate Change Law. (2025). *KlimaSeniorinnen v Switzerland (ECtHR)*. https://climatecasechart.com/non-us-case/union-of-swiss-senior-women-for-climate-protection-v-swiss-federal-council-and-others/

Santos, A., P. Godinho, D., Vizinho, A., Alves, F., Pinho, P., Penha-Lopes, G., & Branquinho, C. (2018). Artificial lakes as a climate change adaptation strategy in drylands: evaluating the trade-off on non-target ecosystem services. *Mitigation and Adaptation Strategies for Global Change*, *23*(6), 887–906. https://doi.org/10.1007/s11027-017-9764-x

Schoonschip Amsterdam. (n.d.-a). *Greenprint Schoonschip Amsterdam* . Retrieved April 25, 2025, from https://greenprint.schoonschipamsterdam.org/

Schoonschip Amsterdam. (n.d.-b). *The most sustainable floating neighborhood in Europe - Developed by its residents* . Retrieved April 25, 2025, from https://schoonschipamsterdam.org/en/

Solecki, W., Orlove, B., & Bolgert, A. (2025). The Role of Catalysts in the Climate Adaptation Process. *WIREs Climate Change*, *16*(1). https://doi.org/10.1002/wcc.931

Stive, M., de Schipper, M., Luijendijk, A., Ranasinghe, R., van Thiel de Vries, J., Aarninkhof, S., van Gelder-Maas, C., de Vries, S., Henriquez, M., & Marx, S. (2013, June). *The Sand Engine: a solution for vulnerable deltas in the 21st century?* https://www.researchgate.net/publication/267450779_The_sand_engine_A_solution_for_vulnerable_deltas_in_the_21st_century

Storbjörk, S., & Hjerpe, M. (2021). Climate-proofing coastal cities: What is needed to go from envisioning to enacting multifunctional solutions for waterfront climate adaptation? *Ocean & Coastal Management*, *210*, 105732. https://doi.org/10.1016/j.ocecoaman.2021.105732

Stowa. (n.d.). *Floods Directive*. Retrieved April 24, 2025, from https://www.stowa.nl/deltafacts/waterveiligheid/delta-facts-english-versions/floods-directive

Swedish National Expert Council (2022). *The Swedish National Expert Council’s first report for climate adaptation – Summary. https://klimatanpassningsradet.se/download/18.437eac6d192990f803f715c/1730810199699/Bilaga%201%20Summary.pdf*

The Finnish Climate Change Panel. (n.d.-a). *History* . Retrieved April 24, 2025, from https://ilmastopaneeli.fi/en/historia-en/

The Finnish Climate Change Panel. (n.d.-b). *The Finnish Climate Change Panel*. Retrieved April 24, 2025, from https://ilmastopaneeli.fi/en/the-finnish-climate-change-panel/

Thorarinsdottir, T. L., Guttorp, P., Drews, M., Kaspersen, P. S., & de Bruin, K. (2017). Sea level adaptation decisions under uncertainty. *Water Resources Research*, *53*(10), 8147–8163. https://doi.org/10.1002/2016WR020354

Toekomstbestendige Leefomgeving. (n.d.). *Toekomstbestendige Leefomgeving*. Retrieved April 25, 2025, from https://toekomstbestendigeleefomgeving.nl/over-ons/

Toreti, A., Bavera, D., Acosta Navarro, J., Cammalleri, C., De Jager, A., Di Ciollo, C., Hrast Essenfelder, A., Maetens, W., Magni, D., Masante, D., Mazzeschi, M., Niemeyer, S., & Spinoni, J. (2022). *Drought in Europe August 2022*.

Umek, G. (2024). *European Water Summit - Transnational water security* . https://www.vlaamsewaterweg.be/sites/default/files/download/ppt_water_summit.pdf

Urban Rigger. (n.d.). *Urban Rigger - About* . Retrieved April 25, 2025, from https://urbanrigger.com/about/

van Belzen, J., Rienstra, G., & Bouma, T. (2021). *Dubbele dijken als robuuste waterkerende landschappen voor een welvarende Zuidwestelijke Delta*. https://doi.org/https://doi.org/10.25850/nioz/7b.b.kb

van Ginkel, K. C. H., Botzen, W. J. W., Haasnoot, M., Bachner, G., Steininger, K. W., Hinkel, J., Watkiss, P., Boere, E., Jeuken, A., de Murieta, E. S., & Bosello, F. (2020). Climate change induced socio-economic tipping points: review and stakeholder consultation for policy relevant research. *Environmental Research Letters*, *15*(2), 023001. https://doi.org/10.1088/1748-9326/ab6395

Verschuuren, J. (2015). Connectivity: is Natura 2000 only an ecological network on paper? In C. H. Born, A. Cliquet, H. Schoukens, D. Misonne, & G. Van Hoorick (Eds.), *The Habitats Directive in its EU Environmental Law Context* (pp. 285–302). Routledge.

Weisscher, S. A. H., Baar, A. W., van Belzen, J., Bouma, T. J., & Kleinhans, M. G. (2022). Transitional polders along estuaries: Driving land-level rise and reducing flood propagation. *Nature-Based Solutions*, *2*, 100022. https://doi.org/10.1016/j.nbsj.2022.100022

Werklandschappen van de Toekomst. (n.d.). *Werklandschappen van de Toekomst*. Retrieved April 25, 2025, from https://www.werklandschappen.nl/

Wetenschappelijke Klimaatraad. (n.d.). *About the Netherlands Scientific Climate Council*. Retrieved April 24, 2025, from https://www.wkr.nl/over-de-wkr/about-the-wkr

Winkelmann, R., Donges, J. F., Smith, E. K., Milkoreit, M., Eder, C., Heitzig, J., Katsanidou, A., Wiedermann, M., Wunderling, N., & Lenton, T. M. (2022). Social tipping processes towards climate action: A conceptual framework. *Ecological Economics*, *192*, 107242. https://doi.org/10.1016/j.ecolecon.2021.107242

Zevenbergen, C., Rijke, J., van Herk, S., & Bloemen, P. (2015). Room for the River: a stepping stone in Adaptive Delta Management . *International Journal of Water Governance* , *1*, 121–140.
