# Supplementary material for: Opportunities for advancing climate adaptation in Europe
Source: Research Square preprint supplement (doi:10.21203/rs.3.rs-7090828/v1), 2025-10-06
Supplement: Supplementary file 2 [file 2bfdee91b48b387c27744895.xlsx]

## Sheet: Adaptation opportunities
Number in figures	Name	Description	Why an opportunity	Opportunity type (1)	Opportunity type (2)	Opportunity type (3)	Opportunity type (4)	Timing	Window opens	Window closes	Possible reasons for closing window	Location	Scale	Impact on pathways (1)	Impact on pathways (2)	Impact on pathways (3)	Explanation impact on pathways	References (full reference list available in Supplementary Information)
1	Dams past end-of-life (2025)	Out of the 1145 considered dams, 59 dams were identified throughout Europe which are older than 100 years, which is usually the design-life of dams. Most of these dams are found in the UK (15), Spain (15), and Germany (7). Other dams belonging to the list are in Norway, France, Switzerland, Italy, Sweden and Poland.	more affordable	maintenance-driven				Present	2025 (reference year to calculate age of dams)		Window closes once dam does not meet the safety standards anymore	UK, Spain, Germany, Norway, France, Switzerland, Poland, Italy, Sweden	Local	Postpone ATP	Anticipate implementation		The need for maintenance of dams currently past their end-of-life could be used as an opportunity to strenghten them, thereby prolonging their life (postpone ATP). When planned maintenance/reconstruction is instead taken as an opportunity to subsitute the aging dams with a new dam type (e.g. from a movable barrier to a permanent barrier), or with a different strategy (e.g. room for the river), th…	GranD Database: Lehner, B., Reidy Liermann, C., Revenga, C., Vörösmarty, C., Fekete, B., Crouzet, P., Döll, P., Endejan, M., Frenken, K., Magome, J., Nilsson, C., Robertson, J., Rödel, R., Sindorf, N., Wisser, D. (2011): High- resolution mapping of the world’s reservoirs and dams for sustainable river-flow management. Frontiers in Ecology and the Environment 9: 494–502. doi: 10.1890/100125. Avail…
2	Dams past end-of-life by 2030	Out of the 1145 considered dams, 23 additional dams are expected to reach their planned end-of-life (100years since construction) by 2030. These are located in the UK, Switzerland, Norway, Italy, Spain, Germany, France and Ireland.	more affordable	maintenance-driven				Future	2030		Window closes once dam does not meet the safety standards anymore	23 dams across Europe	Local	Postpone ATP	Anticipate implementation		The predicted need for maintenance of dams which will pass their end-of-life in 2030 could be used as an opportunity to strenghten them, thereby prolonging their life (postpone ATP). When planned maintenance/reconstruction is instead taken as an opportunity to subsitute the aging dams with a new dam type (e.g. from a movable barrier to a permanent barrier), or with a different strategy (e.g. room…	GranD Database: Lehner, B., Reidy Liermann, C., Revenga, C., Vörösmarty, C., Fekete, B., Crouzet, P., Döll, P., Endejan, M., Frenken, K., Magome, J., Nilsson, C., Robertson, J., Rödel, R., Sindorf, N., Wisser, D. (2011): High- resolution mapping of the world’s reservoirs and dams for sustainable river-flow management. Frontiers in Ecology and the Environment 9: 494–502. doi: 10.1890/100125. Avail…
3	Dams past end-of-life by 2040	Out of the 1145 considered dams, 69 additional dams are expected to reach their planned end-of-life (100 years since construction) by 2040. These are located in the Uk, Switzerland, Norway, Portugal, Italy, Spain, Sweden, Poland, Latvia, Germany, Finland, France and Belgium.	more affordable	maintenance-driven				Future	2040		Window closes once dam does not meet the safety standards anymore	69 dams across Europe	Local	Postpone ATP	Anticipate implementation		The predicted need for maintenance of dams which will pass their end-of-life in 2040 could be used as an opportunity to strenghten them, thereby prolonging their life (postpone ATP). When planned maintenance/reconstruction is instead taken as an opportunity to subsitute the aging dams with a new dam type (e.g. from a movable barrier to a permanent barrier), or with a different strategy (e.g. room…	GranD Database: Lehner, B., Reidy Liermann, C., Revenga, C., Vörösmarty, C., Fekete, B., Crouzet, P., Döll, P., Endejan, M., Frenken, K., Magome, J., Nilsson, C., Robertson, J., Rödel, R., Sindorf, N., Wisser, D. (2011): High- resolution mapping of the world’s reservoirs and dams for sustainable river-flow management. Frontiers in Ecology and the Environment 9: 494–502. doi: 10.1890/100125. Avail…
4	Dams past end-of-life by 2050	Out of the 1145 considered dams, 52 additional dams are expected to reach their planned end-of-life (100 years since construction) by 2050. These are located in the UK, Switzerland, Norway, Potugal, Italy, Spain, Sweden, Poland, Latvia, Germany, Finland, France and Belgium.	more affordable	maintenance-driven				Future	2050		Window closes once dam does not meet the safety standards anymore	52 dams across Europe	Local	Postpone ATP	Anticipate implementation		The predicted need for maintenance of dams which will pass their end-of-life in 2050 could be used as an opportunity to strenghten them, thereby prolonging their life (postpone ATP). When planned maintenance/reconstruction is instead taken as an opportunity to subsitute the aging dams with a new dam type (e.g. from a movable barrier to a permanent barrier), or with a different strategy (e.g. room…	GranD Database: Lehner, B., Reidy Liermann, C., Revenga, C., Vörösmarty, C., Fekete, B., Crouzet, P., Döll, P., Endejan, M., Frenken, K., Magome, J., Nilsson, C., Robertson, J., Rödel, R., Sindorf, N., Wisser, D. (2011): High- resolution mapping of the world’s reservoirs and dams for sustainable river-flow management. Frontiers in Ecology and the Environment 9: 494–502. doi: 10.1890/100125. Avail…
5	Dams past end-of-life by 2100	Out of the 1145 considered dams, 922 additional dams are expected to reach their planned end-of-life (100 years since construction) by 2100. These are located in all countries in the area of study, with the exception of Liechtenstein, Estonia, Malta, and Denmark.	more affordable	maintenance-driven				Future	2100		Window closes once dam does not meet the safety standards anymore	922 dams across Europe	Local	Postpone ATP	Anticipate implementation		The predicted need for maintenance of dams which will pass their end-of-life in 2100 could be used as an opportunity to strenghten them, thereby prolonging their life (postpone ATP). When planned maintenance/reconstruction is instead taken as an opportunity to subsitute the aging dams with a new dam type (e.g. from a movable barrier to a permanent barrier), or with a different strategy (e.g. room…	GranD Database: Lehner, B., Reidy Liermann, C., Revenga, C., Vörösmarty, C., Fekete, B., Crouzet, P., Döll, P., Endejan, M., Frenken, K., Magome, J., Nilsson, C., Robertson, J., Rödel, R., Sindorf, N., Wisser, D. (2011): High- resolution mapping of the world’s reservoirs and dams for sustainable river-flow management. Frontiers in Ecology and the Environment 9: 494–502. doi: 10.1890/100125. Avail…
6a	Expected end-of-life storm surge barriers (MOSE)	A future adaptation opportunity window can be predicted to open in relation to the the tipping point of the MOSE movable barrier in Venice, Italy. The MOSE (full name Modulo Sperimentale Elettromeccanico) is a movable barrier made up of 78 mobile gates at three Venice lagoon inlets (Lido, Malmocco and Chioggia). Construction of the MOSE started in 2003 and was completed in 2020, this was followed…	more affordable, more desirable	maintenance-driven				Future	2050 (110cm); 2070 (130cm RCP8.5), 2080 (130cm RCP2.6)		Window closes once storm surge barrier does not meet the safety standards anymore	Venice, Italy	Local	Postpone ATP	Anticipate implementation		The predicted need for maintenance/end of life of the MoSE barrier could be used as an opportunity to strenghten in, thereby prolonging its life (postpone ATP). When planned maintenance/reconstruction is instead taken as an opportunity to subsitute the aging barrier (or the barrier which is not used as intended anymore, e.g because it has to remain closed for most of the year) with a new barrier …	MOSE Venezia, n.d.; Giupponi et al., 2024; Lionello et al. (in development)
6b	Expected end-of-life storm surge barriers (Thames barrier)	A future adaptation opportunity window can be predicted to open in relation to the end-of-design of the Thames barrier in London, UK. The Thames Barrier is made up of a system of 10 mechanical gates in total and closes when a surge tide is forecasted. The construction of the barrier was completed in 1982. The barrier as it is now can protect London from storm surges with annual exceedence probabi…	more affordable, more desirable	maintenance-driven				Future	2070		Window closes once storm surge barrier does not meet the safety standards anymore	London, UK	Local	Postpone ATP	Anticipate implementation		The predicted need for maintenance/end of life of the Thames barrier could be used as an opportunity to strenghten in, thereby prolonging its life (postpone ATP). When planned maintenance/reconstruction is instead taken as an opportunity to subsitute the aging barrier (or the barrier which is not used as intended anymore, e.g because it has to remain closed for most of the year) with a new barrie…	Penning-Rowsell et al., 2013; Hall, Harvey and Manning, 2019; Gov.UK; 2014
6c	Expected end-of-life of storm surge barriers (Maeslant Barrier)	A future adaptation opportunity window can be predicted to open in relation to the ATP of the Maeslant barrier in Rotterdam, near the Hoek van Holland (the Netherlands). The Maeslant barrier is the largest movable barrier in the world and it was design to withstand a surge of up 5m above NAP. Construction of the barrier started in 1991 and was completed in 1997. The barrier was closed for the fir…	more affordable, more desirable	maintenance-driven				Future	2075 (accelerated SLR scenarios); 2100 (delta scenarios 4.5 and 8.5)		Window closes once storm surge barrier does not meet the safety standards anymore	Rotterdam, NL	Local	Postpone ATP	Anticipate implementation		The predicted need for maintenance/end of life of the Maeslant barrier could be used as an opportunity to strenghten in, thereby prolonging its life (postpone ATP). When planned maintenance/reconstruction is instead taken as an opportunity to subsitute the aging barrier (or the barrier which is not used as intended anymore, e.g because it has to remain closed for most of the year) with a new barr…	Kwadijk et al., 2010; Haasnoot et al., 2020; Rijkswaterstaat, n.d.; Netherlands Water Partnership, 2023;
7	Diversification of ski tourism	Winter sport tourism in low-altitude alpine regions may soon approach a SE tipping point due to increasing temperatures and loss of snow. This can be seen as a soon-opening opportunity window to adapt by diversifying tourism in those areas to mostly cather to summer tourists escaping the heat in Southern Europe. Identification of SE tipping point initially from stakeholders in a workshop setting,…	more affordable, more desirable	resource-driven				Present	2020 (date of study identifying approaching tipping point)	By the end of the century (then only ski resorts with ski lines above 1800–2000 m elevation will survive regardless of the climate scenarios) or earlier	Window closes once winter sport tourism not economically viable anymore	Austria, Northern Italy, France, Switzerland	Regional	Broaden solution space			Identifying an upcoming social tipping point may result in broadening of the solution space, as transformational measures may be implemented, which are useful for dealing with the approaching social tipping point.	Van Ginkel et al., 2020; Ashraf Vaghefi et al., 2021
8	Cost-effective adaptation strategies to sea level rise	Academic study assessing the cost-benefit ratio in the time period 2020-2100 of various measures against SLR across Europe under a range of RCP scenarios. Four adaptation strategies are assessed, considering costs (investment and maintenance costs) and benefits (economic damages avoided by implementing the measure). (Particularly) advantageous benefit-cost ratios indicate the potential opening of…	more desirable	resource-driven				Present	2020 (date of study), calculations include timeline 2020-2100		Window will close when costs are higher than benefits again	all Europe (EU + UK)	Europe	Broaden solution space	Change pathways ranking (evaluation)		Cost effectiveness assessment provides insight in the effectiveness of different measures, and provides the possibility to change the ranking of pathways.	Dottori et al., 2023
9	Optimal timing for saving Bergen from sea level rise	Assessment of cost and benefits of sea level rise protection measures in Bergen (Norway) to determine the optimal moment in time when these measures should be implemented, and thus when the window of opportunity for their implementation will open. In Bergen (Norway), optimal timing for greater flood protection of the city is estimated to be from 2040 onwards, through building the cheaper inner ba…	more desirable	resource-driven				Future	2016 (start calculations)	2059	Window will close when costs are higher than benefits again	Bergen, Norway	Local	Broaden solution space	Anticipate implementation		Cost effectiveness assessment provides insight in the effectiveness of different measures, and provides the possibility to change the ranking of pathways.	Thorarinsdottir et al., 2017
10	Follow-up extreme events: European Droughts 2018-2022	Multiple heat and drought events in the 2018-2022 period in Europe, involving consecutive multi-year metereological summer droughts, particularly in central and western Europe. The multiple and consecutive events resulted in further growth of awareess of drought risk across Europe. In particular, in the summer of 2022 tangible impacts include (but not limited to): limited municipal water supply, …	more desirable	value-driven				Present	2018, multiple events every year but especially large 2022		Window closes on average after XX years, average time for which an extreme event/natural disaster affects people's values	Impacts across Europe throughout the years, in summer 2022 central and southern Europe particularly. In particular large impacts in Italy, France, Portugal, NL, Germany, Slovenia, Hungary, Romania (wildfires: Italy, Slovenia, France, Romania). Throughout the whole period largest impacts in central europe.	Europe	Broaden solution space			In this case, extreme events have resulted in a call for implementation of a nonstructural adaptation measures in the form of creating an EU-wide directive on drought management (broaden solution space).	Blauhut et al., 2022 ; Biella et al., 2024; Cavalcante et al 2023; Kreibich et al 2023; Bevacqua et al., 2024; Toreti et al., 2022; Knutzen et al., 2025
11	Fridays For Future and (EU) climate policy	Approaching social tipping point in EU: The large-scale public activism and social movements associated with FFF were found to have been one of the drivers for bottom-up support for more proactive climate policies, which could create the conditions for tipping points towards radical policy changes throughout the European Union. Growing support (and associated opening of value-driven opportunity w…	more desirable	value-driven				Past	2019	2024?	Window is closing: other shocks and policy priorities	Belgium, Germany, Finland, France, Luxembourg, Austria, Switzerland	National (multiple countries)	Change pathways ranking (evaluation)	Broaden solution space		When climate (adaptation) policy is perceived as high importance by citizens, this may increase the desirability of pathways which score high in terms of sustainability and nature conservation (change pathways ranking). This may also drive the consideration of nature-based solutions, despite e.g. higher costs, due to the importance given to environmental protection (broaden solution space).	Winkelmann et al., 2022; European Parliament, n.d.			In the current plan, replacement of the Maeslant barrier by a combination of a closed dam and locks as well as replacement with a new storm surge barrier are considered options for the long term.
12	Compliance with EU Water Framework Directive (WFD)	Upcoming major deadlines associated with EU WFD will require action on water quality management throughout Europe, this can be an opportunity to find synergies between water quality and climate adaptation. The following major deadlines are upcoming: 4th cycle (3rd update) RBMPs and PoMs deadline for publication 22 december 2027 and for implementation 22 december 2030 + deadline to achieve 'good s…	more affordable, more feasible	policy-driven				Present	2022	2027-2028	Window closes at the end of the implementation window	Whole EU	Europe (EU)	Change pathways ranking (evaluation)	Anticipate implementation		The necessity to implement measures to improve water quality to avoid fines can serve as a trigger to implement adaptation measures which are both useful for risk reduction and water quality improvement. This may also invovle measures which may not have yet been necessary from a risk reduction perspective, but can now be more easily implemented due to synergies with water quality enhancement (ant…	ClientEarth, 2023; European Commission, n.d.; European Environmental Agency, 2021; European Commission, 2021; IPCC Europe Chapter 13.4.2
13	Compliance with EU Floods Directive	Upcoming deadline for reporting period, in line with those of WFD, but more unclear in how the different countries are doing, FD is also much less prescriptive than WFD. 3rd cycle for updating of flood hazard & risk maps & flood risk management plans runs between 2022 and 2027.	more affordable, more feasible	policy-driven				Present	2022	2027	Window closes at the end of implementation window	Whole EU	Europe (EU)	Anticipate implementation			The necessity to implement measures to improve flood risk management to avoid fines can serve as a trigger to implement adaptation measures which may not have yet been necessary from a risk reduction perspective, but can now be more easily implemented due to synergies with the objectives of hte DIrective.	European Commission, n.d.; Stowa, n.d.
14	Compliance and implementation of EC Habitats Directive & Birds Directive	Birds and Habitats Directives are the main components of the EU biodiversity policy. The Natura2000 framework is also a result of the collaboration betwen the two Directives. The results of the implementation of the Directives is reported by member states every 6 years, and the results are published into a 'State of Nature in the European Union' report. According to the latest report (published i…	more affordable	policy-driven				Present	2025	2030	Window closes at the end of implementation window	Whole EU	Europe (EU)	Change pathways ranking (evaluation)	Anticipate implementation		The necessity to implement measures to improve biodiversity and nature protection to avoid fines can serve as a trigger to implement adaptation measures which are both useful for risk reduction and nature conservation. This may also invovle measures which may not have yet been necessary from a risk reduction perspective, but can now be more easily implemented due to synergies with nature connserv…	IPCC 2023 EU Chaper, 13.4.2; Verschuuren, 2015 as in IPCC; European Commission, n.d.
15, 16	Establishment of (national) climate councils	National climate councils have recently been established, which create a direct link between policymakers and climate scientists. This provides additional chances to highlight the importance of climate (adaptaion) action to policymakers, and can be an opportunity to thus further implement adaptation policies and push for implementation, in particular in those cases where the councils can also sha…	more desirable	policy-driven				Present	2008 (first national climate council in UK)		Window could close if policy priprities change: councils are removed, their responsibilities are dimished, or their relevance turns out to be limited	the Nertherlands, Finland, France, Germany, Iceland, Ireland, Sweden, UK, Slovenia, whole EU	National + Europe (EU)	Anticipate implementation			The creation of a climate council may bring additional legitimacy to climate adaptation action, and reports/assignments/recommendations brought forward by such councils may speed up implementation (anticipate implementation).	International Climate Councils Network, n.d.; Wetenschappelijke Klimaatraad, n.d.; Klimaradet, n.d.; The Finnish Climate Change Panel, n.d.a; The Finnish Climate Change Panel, n.d.b; Haut Conseil pour le Climat. n.d.; Expertenrat fur Klimafragen, n.d.; Loftslagsrad - Icelandic Climate Council, n.d.a; Loftslagsrad - Icelandic Climate Council, n.d.b; Climate Change Advisory Council, 2023; Climate C…
17	Successful pilots: Floating/amphibious buildings	Innovative examples of houses/communities/neighboorhoods on water showcase how living environments can adapt to SLR. The homes/neighbourhoods/communities are showcased as examples of successful living on water that is sustainable, community-focused, climate adaptive and they are also often described as a solution to the housing crisis. Both raising and amphibious houses are considered. Large floa…	more feasible, more affordable	innovation-driven				Present	2005 (Maasbommel, NL). Other events: 2010 (Harnaschpolder Delft, NL); 2011 (Pavillion Rotterdam, NL); 2015 (Aquadock Rotterdam, NL); 2016 (Thames Amphibious house, UK); 2019 (Floating farm Rotterdam, NL; Urban Rigger Copenhagen, Denmark); 2020 (Schoonschip Amsterdam, NL); 2021 (Floating office Rottrdam, NL); 2025 (Nassauharbour Rotterdam, NL, in development)		Window would close when innovative measure is found not to be as effective as thought, when acceptability is/remains low, or when pilots are unsuccessful	Multiple locations in NL, one in Copenhagen (Denmark) and one in the UK	Local	Broaden solution space	Postpone ATP		The success of the existing pilots suggest that the measure could be upscaled, and additional research could be take place in e.g. the development of floating houses which may also be located in more open waters, thereby broadening the solutions space now and potentially even further in the future. Additionally, floating houses may allow for people to continue living in flood-prone areas for long…	IPCC 2023 CCP2: Cities and Settlements by the Sea; Penning-Rowsell, 2020; Storbjörk and Hjerpe, 2021; Climate ADAPT, 2016a; Climate ADAPT, 2016b; Schoonschip Amsterdam, n.d.a; Schoonschip Amsterdam, n.d.b; Blue21, n.d.; Rotterdam Make it Happen, n.d.; Urban Rigger, n.d.; Baca Aquatecture, n.d.; Boiten raadgevende ingenieurs bv and Factor Architecten bv, 2011
18	Successful pilots: Sand engine	Sand engines are innovative soft-engineering and NbS measures that serve for beach nourishment, flood protection, nature protection and/or recreational purposes. Sand engines work by concentrating all regular coastline maintenance nourishments in space and time, and thus have natural processes distribute sediments over the wider coastal system. The sand engine approach undertaken in the Netherlan…	more feasible, more affordable	innovation-driven				Present	2011 (construction Zand Motor, NL). Other event: 2018 start construction Sandscaping (UK)		Window would close when innovative measure is found not to be as effective as thought, when acceptability is/remains low, or when pilots are unsuccessful	The Netherlands: Holland coast, between Hoek of Holland and the Hague; UK: Bacton, Norfolk.	Regional	Broaden solution space			The success of the existing pilots suggest that the measure could be upscaled and replicated elsewhere, thereby broadening the solution space in those locations.	Brière et al., 2018; Stive et al., 2013; Royal HaskoningDHV, n.d.; North Norfolk District Council, n.d.
19	Evidence of successful adaptation: On-farm diversification	Evidence of successful local adaptation as identified in the latest IPCC report. An innovation-driven opportuity window thus opened as it presents the opportunity to further test and mainstream this local solution elsewhere. On farm diversification by means of e.g. an integrated crop-livestock system where tested and found successful as adaptation option in France. A stronger integration between …	more feasible, more desirable	innovation-driven				Present	2022 (IPCC report published)		Window would close when innovative measure is found not to be as effective as thought, when acceptability is/remains low, or when pilots are unsuccessful	Farms in maritime and semi-maritine regions in Western France	Local	Broaden solution space			The effectiveness of the measure suggests that this could be implemented in other locations, thereby broadening the solutions space.	IPCC Water Chapter (table 4.8); Havet et al., 2014
20	Evidence of successful adaptation: Artificial lakes	Evidence of successful local adaptation as identified in the latest IPCC report. An innovation-driven opportuity window thus opened as it presents the opportunity to further test and mainstream this local solution elsewhere. The creation of artificial lakes was tested and found successful as a climate adaptation measure in Portugal for water and soil conservation. The construction of lakes in Med…	more feasible, more desirable	innovation-driven				Present	2022 (IPCC report published)		Window would close when innovative measure is found not to be as effective as thought, when acceptability is/remains low, or when pilots are unsuccessful	South-Western Portugal (Baixo Alentejo region)	Local	Broaden solution space			The effectiveness of the measure suggests that this could be implemented in other locations, thereby broadening the solutions space.	IPCC Water Chapter (table 4.8); Santos et al., 2018
21	Evidence of successful adaptation: Sustainable urban drainage	Evidence of successful local adaptation as identified in the latest IPCC report. An innovation-driven opportuity window thus opened as it presents the opportunity to further test and mainstream this local solution elsewhere. Urban water management in the form of incorporating low-impact development and urban design features for sustainable urban drainage systems was tested and found to be effecti…	more feasible, more desirable	innovation-driven				Present	2022 (IPCC report published)		Window would close when innovative measure is found not to be as effective as thought, when acceptability is/remains low, or when pilots are unsuccessful	district of Valdebebas, Madrid (Spain)	Local	Broaden solution space			The effectiveness of the measure suggests that this could be implemented in other locations, thereby broadening the solutions space.	IPCC Water Chapter (table 4.8); Rodríguez-Sinobas et al., 2018
22	Evidence of successful adaptation: Pavement watering	Evidence of successful local adaptation as identified in the latest IPCC report. An innovation-driven opportuity window thus opened as it presents the opportunity to further test and mainstream this local solution elsewhere. Urban water management in the form of pavement watering for mitigation of urban heat island was tested and found to be effective in Paris, France. Pavement-watering reduced t…	more feasible, more desirable	innovation-driven				Present	2022 (IPCC report published)		Window would close when innovative measure is found not to be as effective as thought, when acceptability is/remains low, or when pilots are unsuccessful	Rue du Louvre, paris (France)	Local	Broaden solution space			The effectiveness of the measure suggests that this could be implemented in other locations, thereby broadening the solutions space.	IPCC Water Chapter (table 4.8); ; Hendel and Royon, 2015
23	Successful pilots: Transitional polders (exchange polders, wisselpolders)	Transitional polders/exchange polders/wisselpolders are a novel NbS strategy for flood risk management between double dikes. One of the two dikes is the existing higher sea dike, the other one is an either existing or to be constructed lower second dike. The strategy consists of 3 phases: 1) controlled dike breach of the main dike, resulting in openining of the polder to the tide and thus allowin…	more fesible, more affordable	innovation-driven				Present	2018 (start Dubbeldijk project in Bierum)		Window would close when innovative measure is found not to be as effective as thought, when acceptability is/remains low, or when pilots are unsuccessful	Along the coasts of the Western Scheldt, the Eastern Scheldt and the Haringvliet in the SW Delta of the Netherlands; Double Dike pilot project currently being implemented in the north Dutch coast in Groningen (Nieuwstad, south of the Eemshaven in Bierum, Groningen province)	Regional/Local?	Broaden solution space	Postpone ATP		The success of the existing pilots suggest that the measure could be upscaled, thereby broadening the solutions space. Additionally, the increased sediment deposition during temporary flooding of the polder may prolongue the life of the dike (postpone ATP).	Weisscher et al., 2022; van Belzen, Rienstra and Bouma; 2021; Eemsdollard2050, n.d.
24	Successful pilots: Biogenic reefs	The restoration and/or creation of mussel/oyster (both ecosystem engineers) beds and reefs (biogenic reefs) has been gaining interest as a NbS for coastal protection from erosion. The measure can result in coastal protection due to wave attenuation, slowing down of current velocities and thus contribution to stabilization of intertidal flats bed in front of dikes. Additionally, the measure can pr…	more feasible, more affordable	innovation-driven	policy-driven			Present	2017 (start pilot project de Penne, Belgium)		Window would close when innovative measure is found not to be as effective as thought, when acceptability is/remains low, or when pilots are unsuccessful	Belgian part of the North Sea, near De Penn	Local	Broaden solution space			The success of the existing pilots suggest that the measure could be upscaled, thereby broadening the solutions space.	Islam et al., 2024; Borsje et al., 2011; Cheong et al., 2013; De Vries et al., 2007 as in Borsje et al., 2011; Coen et al., 2007 as in Borsje et al., 2011; Pineda-Metz et al., 2023; Goedefroo et al., 2022
25	Post disaster recovery: 2021 Western EU floods	The reconstruction following the 2021 flood in Germany provide multiple opportunities for BBB and ensuring that climate resilient development is accounted for in the reconstruction. In Belgium, the floods have triggered awareness of the (lack of) resilience against extreme precipitation events resulted the commission of an expert panel. Germany: Some of these opportunities appear just after the e…	more desirable, more affordable (reconstruction)	resource-driven	maintenance-driven	value-driven	policy-driven	Present	2021		Window closes on average after XX years, average time for which an extreme event/natural disaster affects people's values	Germany (Rhineland-Palativate (Ahr Valley) and North Rhine-Westphalie; Belgium (Wallonia); Luxembourg; the Netherlands (Limburg)	Regional (in multiple countries)	Anticipate implementation	Broaden solution space		In the follow-up to a disaster triggered by climate impacts, risk tolerance might be negatively affected, and this may result in reconstruction with increased resilience. This may involve the implementation fo measures that were initially only considered necessary in the future (anticipate implementation). Similarly, large-scale measures, which may have initially have been considered as an unacce…	Birkmann et al., 2023; Garside and Zhai, 2022; Expertpanel Hoogwaterbeveiliging, 2022
26	Post-disaster recovery: multiple Greece wildfires	Each wildfire accident is an opportunity for learning and improvement of existing strategies and practices. Following events in 2021 appointment of a new minister for recovery from natural disasters (31-08-2021) + creation of 500 million eur relief package from national government (august 2021). After Mati and Evia Islands wildfires, national Greek government released compensation and relief allo…	more desirable, more affordable (investment)	resource-driven	policy-driven	value-driven		Present	2007 (each new event enhances the opportunity)		Window closes on average after XX years, average time for which an extreme event/natural disaster affects people's values	Greece (Peloponnese region 2007; Mati island 2018; Evia Island 2021; Evros region: Mount Parintha around Athens 2023	National	Anticipate implementation	Broaden solution space		In the follow-up to a disaster triggered by climate impacts, risk tolerance might be negatively affected, and this may result in reconstruction with increased resilience. This may involve the implementation fo measures that were initially only considered necessary in the future (anticipate implementation). Similarly, large-scale measures, which may have initially have been considered as an unacce…	Koundouri, 2023; OECD, 2024
27	Post disaster recovery: 2023 Slovenia floods	Reconstruction following from the August 2023 floods in Slovenia, which was the largest in Slovenia history and resulted in a total of 10.000.000.000,00 € in damages, pose as an opportunity for disaster recovery which prioritizes resilience and climate adaptation. Estimations of direct damage costs from the floods reach even 16% of the national GDP. In general, the even resulted in awareness rais…	more desirable, more affordable (investment), more feasible	policy-driven	resource-driven	value-driven		Present	2023		Window closes on average after XX years, average time for which an extreme event/natural disaster affects people's values	Slovenia	National	Anticipate implementation	Broaden solution space		In the follow-up to a disaster triggered by climate impacts, risk tolerance might be negatively affected, and this may result in reconstruction with increased resilience. This may involve the implementation fo measures that were initially only considered necessary in the future (anticipate implementation). Similarly, large-scale measures, which may have initially have been considered as an unacce…	Umek, 2024; European Commission Joint Research Centre, 2025 ; Jensen, 2025
28	Climate-action related violations of EU Convention for human rights	The European Human Rights court found that the Human Rights Convention encompasses a right for individuals to effective protection by the State authorities from the serious adverse effects of climate change on their lives, health, wellbeing and quality of life. They explicitly then state how this in practice requires duty from the States to adopt, and to apply in practice, regulations and measure…	more desirable, more feasible	policy-driven	value-driven			Present	2024 (press release judgement)		Window could close relatively soon if no extension towards climate adaptation, or if follow-up cases are unsuccessful in court	Whole EU	Europe (EU)	Anticipate implementation	Broaden solution space		The risk of being taken to court may become an incentive to speed up implementation, and thus anticipate implementation of measures which were first not considered as priorities. Similarly, particularly large scale measures which were first not considered may be brought back to the table (broaden solution space).	Sabin Center for Climate Change Law, 2025a; Sabin Center for Climate Change Law, 2025b; Solecki et al., 2025
29	Dutch national Groeifonds	The 'nationaal groeifonds' is an initative from the Dutch Ministries for Economic Affairs and Climate and Finance which invests (11 billion euros) in projects which are expected to leverage the most sustainable and structural national economic growth. The investments are intended for projects involving either knowledge development and research or development and innovation. Some of the projects t…	more feasible, more affordable	innovation-driven	resource-driven			Future	2033 (end projects started in 2023)		Window could close in 2033 if projects are not successful, measures are not as effective as expected, no interest in picking up the examples or acceptance of measures is low	the Netherlands	National	Broaden solution space			If the adaptation measures (and approaches, and technologies) researched are found to be effective by the end of the projects (2033), these may be upscaled and implemented in other locations (in and outside of the Netherlands), thereby broadening the solution space.	Rijksoverheid, n.d.; NL2120, n.d.; ReGeNL, n.d; CropXR, n.d.; Werklandschappen van de Toekomst, n.d.; Toekomstbestendige Leefomgeving, n.d.
30	Successful pilots: Room for the river	The measure can generally be described as the creation of detention areas which can be flooded in a controlled way to temporarely store excess water during extreme events, so to reduce peak flows. In the Netherlands, such an approach was implemented under the name of the 'Room for the river' project, which involved wetland restoration for flood risk reduction. The Isar River restoration project (…	more feasible, more desirable	innovation-driven	resource-driven	value-driven		Present	1995 (launch Isarplan Munich, Germany), window enhanced with national Room for the River project in NL in 2006		Window would close when innovative measure is found not to be as effective as thought, when acceptability is/remains low, or when pilots are unsuccessful	the Netherlands; Munich (Germany)	Local + National	Broaden solution space			The effectiveness of the measure suggests that this could be implemented in other locations, thereby broadening the solutions space.	IPCC 2023 Water Chapter (table 4.8); Zevenberger et al., 2015; Roth and Winnubst, 2014; Climate ADAPT, 2016c
31	Successful pilots: Water desalination	Desalination capacity is increasing worldwide, but it is still limited by high energy demands, costs and its production of brine waste. Hotspot for desalinization in Europe is Spain, particularly in the Southeast, due to the high (and increasing) water scarcity, which results in need for production of alternative water resouces. Costs remain an issue and users have been requesting reduced rates. …	more affordable, more feasible	innovation-driven	resource-driven			Present	2005 (major investments in Spain)		Window would close when innovative measure is found not to be as effective as thought, when acceptability is/remains low, or when pilots are unsuccessful	Spain, particularly South-Eastern part	Regional	Broaden solution space			Existing pilots suggest that the measure could potentially be upscaled, but additional research is first needed for descreasing the costs. In the future, this measure may resut in broadening of the solution space.	IPCC 2023 Europe Chapter (section 13.2.2.2); Jones et al., 2019 ; Navarro, 2018; Navarro, 2012 as in Navarro, 2018; Morote, Rico and Molto', 2017; Martinez-Fernandex, 2009 as in Morote, Rico and Molto', 2017; Hanasaki et al., 2016
32	Follow-up extreme events: 2000 floods in the UK (taken)	In 2000, major floods affected large parts of the UK. This resulted in the development of the national report 'Making Space for Water'. 2007 floods wee followed by the publication of the Pitt Review around lessons from the floods. Positive impact on adaptation efforts also followed from droughts in the summer of 2003 and 2006. Overall, each new event, it being floods or droughts, reinforced aware…	more desirable, more feasible	policy-driven	value-driven			Past	2000	2008/2009 (then national climate council opportunity window)	Window already closed	UK (England in particular)	National	Anticipate implementation	Change pathways ranking (evaluation)		Additional adaptation policies were developed in the follow-up to the events thanks to building momentum. These policies would otherwise have been implemented later (or not at all). Growing in awareness around climate impacts can also change pathways ranking by allowing for example more weight to be given to climate adaptation as a whole, or particular measures for dealing with extreme events.	Keskitalo et al., 2012
33	Follow-up extreme events: 2001 floods and 2005-2007 storms in Sweden (taken)	2001: major floods impacted Stockholm and Gothenburg and several other cities. The events have since been described as a wake up call for awareness of the relationship between climate change and extreme events. Two storms in Gudrun (2005) Per (2007) helped (together with the 2003 European drought) to build the momentum resulting in the creation of a Swedish National Commission on Climate and Vuln…	more feasible, more desirable		value-driven	policy-driven		Past	2001	2009	Window already closed	Sweden	National	Change pathways ranking (evaluation)	Broaden solution space	Anticipating implementation	Growing in awareness around the relationship between climate change and extreme events can change pathways ranking by allowing for example more weight to be given to climate adaptation as a whole, or particular measures for dealing with extreme events. The creation of a new commission with climate-adaptation responsibilities can help speed implementation of adaptation measures, and is by itself b…	Keskitalo et al., 2012
34	Follow-up extreme events: Po River Floods in 2000-2008 and 2003 drought in Italy (missed)	Po River floods in 2000 & 2008 and drought in 2003 triggered action arond flood risk redution in agricultural areas in Emilia Romagna and around water supply and consumption to and from civil and agricultural sectors during dr periods, but the opportunity was missed to also consider future climate risks (rather than just present ones) when doing so. Additionally, it was not possible to translate …	more feasible, more desirable (if taken)	policy-driven	value-driven			Past	2000	2008	Window already closed	Northern Italy (Po Valley)	Regional	Broaden solution space			If leveraged, this opportunity window could have resulted in broadening the solution space from only measures intended to deal with existing flood and drought risks to consideration of (long-term) future risks associated with climate change.	Keskitalo et al., 2012
35	Promising method: Economically-optimal mix and timing of coastal adaptation in Europe (method)	This research identifies economically-optimal coastal adaptation pathways, also including adaptation tipping points/thresholds for individual options (protection, retreat, accomodation and their combinations) for the whole of coastal Europe in the 2020-2150 timescale and under three emission scenarios (SSP1-2.6, SSP2-5.5, SSP5-8.5). In doing so, this also can help identify when and for which meas…	more desirable	resource-driven							Window will close when the window for the next measure within a pathway will open.	Coastal Europe	Europe	Broaden solution space	Anticipate implementation		By identifying economically optimal adaptation pathways, associated adaptation opportunity windows may allow for the consideration of measures which were not considered before, or anticipate the implementation of measures that were first only considered as options in the longer term.	Völz et al., 2025 (preprint)
36	Promising method:Economically-robust protection against 21st century sea level rise (method)	Academic study assessing the cost effectiveness of protection measures against sea level rise along the coasts for the period 2014-2100. Cost-effectiveness assessed as the balance between the costs of implementing coastal protection measures and the benefits derived from avoiding damage due to sea-level rise. To determine cost-effectiveness, both the direct and indirect costs and benefits are con…	more desirable	resource-driven							Window will close when costs are higher than benefits again	Global study, for this research we consider the data for the European coastline (all coasts within area of study)	Global	Broaden solution space			Cost effectiveness assessment provides insight in the effectiveness of different measures, and provides the possibility to change the ranking of pathways.	Lincke & Hinkel, 2018
37	Promising method: Coastal migration due to 21st century sea level rise (method)	Academic study assessing the cost effectiveness of retreat against sea level rise along the coasts for the period 2014-2100. Twin study with the one above. Conducts a CBA to determine the optimal local protection and retreat decisions. Costs include investment and maintance costs, migration costs and residual damage costs. Benefits include avoided damages and cost savings from migration. The stud…	more desirable	resource-driven							Window will close when costs are higher than benefits again	Global study, for this research we consider the data for the European coastline (all coasts within area of study)	Global	Broaden solution space			Cost effectiveness assessment provides insight in the effectiveness of different measures, and provides the possibility to change the ranking of pathways.	Lincke & Hinkel, 2021

## Sheet: Fields and list of countries
Opportunity window types		Why an opportunity? Makes a measure/set of measures…		Timing
maintenance-driven		more affordable: cheaper to implement, either measure itself is cheaper or more resources are available for climate adaptation		Past
resource-driven		more desirable: higher social acceptance/desirability		Present
policy-driven		more feasible: easier to implement, either technically or in terms of governance		Future
value-driven
innovation-driven
		List of all countries included in the study
Manifestation in pathways		EU
Anticipate implementation		Belgium
Postpone ATP		Bulgaria
Broaden solution space		Czechia
Change pathways ranking (evaluation)		Denmark
		Ireland
		France
		Cyprus
		Luxembourg
		Austria
		Romania
		Finland
		Germany
		Greece
		Croatia
		Latvia
		Malta
		Hungary
		Poland
		Slovenia
		Sweden
		Estonia
		Spain
		Italy
		Lithuania
		Netherlands
		Portugal
		Slovakia
		EFTA
		Iceland
		Lichtenstein
		Norway
		Switzerland
		Other
		UK

## Sheet: Opportunities per country
Note: Dams past or approaching end-of-design are only counted as 1 opportunity per opportunity type. This means that if a country has 1 dam past end-of-design today (opportunity 1) and 10 past end-of-design by 2100 (opportunity 5) these would be counted as 2 opportunities in total.
Country	Dams past end-of-life (2025)	Dams past end-of-life by 2030	Dams past end-of-life by 2040	Dams past end-of-life by 2050	Dams past end-of-life by 2100	Expected end-of-life storm surge barriers (MOSE)	Expected end-of-life storm surge barriers (Thames barrier)	Expected end-of-life of storm surge barriers (Maeslant Barrier)	Diversification of ski tourism	Cost-effective adaptation strategies to sea level rise	Optimal timing for saving Bergen from sea level rise	Follow-up extreme events: European Droughts 2018-2022	Fridays For Future and EU climate policy	Compliance with EU Water Framework Directive (WFD)	Compliance with EU Floods Directive	Compliance and implementation of EC Habitats Directive & Birds Directive	Establishment of (national) climate councils	Successful pilots: Floating/amphibious buildings	Successful pilots: Sand engine	Evidence of successful adaptation: On-farm diversification	Evidence of successful adaptation: Artificial lakes	Evidence of successful adaptation: Sustainable urban drainage	Evidence of successful adaptation: Pavement watering	Successful pilots: Transitional polders (exchange polders, wisselpolders)	Successful pilots: Biogenic reefs	Post disaster recovery: 2021 Western EU floods	Post-disaster recovery: multiple Greece wildfires	Post disaster recovery: 2023 Slovenia floods	Climate-action related violations of EU Convention for human rights	Dutch national Groeifonds	Successful pilots: Room for the river	Successful pilots: Water desalination	Follow-up extreme events: 2000 floods in the UK (taken)	Follow-up extreme events: 2001 floods and 2005-2007 storms in Sweden (taken)	Follow-up extreme events: Po River Floods in 2000-2008 and 2003 drought in Italy (missed)				N opportunities	Scales	0 to 5	6 to 10	11 to 15	16 to 20
Belgium			x	x	x					x		x	x	x	x	x	x								x	x			x										13						Belgium
Bulgaria					x					x		x		x	x	x	x												x										8						Bulgaria
Czechia			x		x					x		x		x	x	x	x												x										9						Czechia
Denmark										x		x		x	x	x	x	x											x										8						Denmark
Ireland		x	x		x					x		x		x	x	x	xx												x										11						Ireland
France	x	x	x	x	x				x	x		x	x	x	x	x	xx			x			x						x										17						France
Cyprus					x					x		x		x	x	x	x												x										8						Cyprus
Luxembourg					x					x		x	x	x	x	x	x									x			x										10						Luxembourg
Austria					x				x	x		x	x	x	x	x	x												x										10						Austria
Romania					x					x		x		x	x	x	x												x										8						Romania
Finland				x	x					x		x	x	x	x	x	xx												x										11						Finland
Germany	x	x	x	x	x					x		x	x	x	x	x	xx									x			x		x								16						Germany
Greece			x		x					x		x		x	x	x	x										x		x										10						Greece
Croatia					x					x		x		x	x	x	x												x										8						Croatia
Latvia				x	x					x		x		x	x	x	x												x										9						Latvia
Malta										x		x		x	x	x	x												x										7						Malta
Hungary					x					x		x		x	x	x	x												x										8						Hungary
Poland	x		x	x	x					x		x		x	x	x	x												x										11						Poland
Slovenia					x					x		x		x	x	x	xx											x	x										10						Slovenia
Sweden	x		x	x	x					x		x		x	x	x	xx												x					x					13						Sweden
Estonia										x		x		x	x	x	x												x										7						Estonia
Spain	x	x	x	x	x					x		x		x	x	x	x					x							x			x							14						Spain
Italy	x	x	x	x	x	x			x	x		x		x	x	x	x												x						x				15						Italy
Lithuania					x					x		x		x	x	x	x												x										8						Lithuania
Netherlands			x		x			x		x		x		x	x	x	xx	x	x					x		x			x	x	x								17						Netherlands
Portugal			x	x	x					x		x		x	x	x	x				x								x										11						Portugal
Slovakia					x					x		x		x	x	x	x												x										8						Slovakia
Iceland					x												x																						2						Iceland
Lichtenstein																																							0						Lichtenstein
Norway	x	x	x	x	x						x																												6						Norway
Switzerland	x	x	x	x	x				x				x																										7						Switzerland
UK	x	x	x	x	x		x			x							x	x	x														x						11						UK

## Sheet: Timeline
Number	Opportunity	1995	2000	2001	2002	2003	2004	2005	2006	2007	2008	2009	2010	2011	2012	2013	2014	2015	2016	2017	2018	2019	2020	2021	2022	2023	2024	2025	2026	2027	2030	2033	2040	2050	2059	2070	2075	2080	2100
1, 2, 3, 4, 5	Dams past end-of-life																											Window opens: 59 dams past end of life			Window will open: +23 dams		Window will open: +69 dams	Window will open: +52			Window will open: +922 dams
6a	Expected end-of-life storm surge barriers (MOSE)																																	Window opens: limit barrier (opening threshold 110cm)		Window opens: limit barrier (opening threshold 130cm, RCP8.5)		Window opens: limit barrier (opening threshold 130cm, RCP2.6)
6b	Expected end-of-life storm surge barriers (Thames barrier)																																			Window opens: envisioned end-of-life barrier
6c	Expected end-of-life of storm surge barriers (Maeslant Barrier)																																				Window opens: limit barrier (accelerated SLR scenarios)		Window opens: limit barrier (Delta scenarios RCP 4.5-8.5)
7	Diversification of ski tourism																						Window opens														Window closes (by end of the century): only ski resorts with ski lines above 1800–2000 m elevation will survive regardless of the climate scenarios
8	Cost-effective adaptation to SLR																						Window opens: start calculations CBA until 2100
9	Optimal timing for saving Bergen from sea level rise																		Window opens: start calculations optimal timing for bulding inner barriers to protect the city from SLR																Window closes: end optimal timing building inner barriers to protect the city from SLR
10	Follow-up extreme events: European Droughts 2018-2022																				Window opens: droughts and heat events across Europe	Multiple events all throughout 1028-2022			Event: Major drought across Europe and call for EU Drought Directive
11	Fridays for future and EU climate policy																					Window opens: FFF impact Green Party votes in EU elections					Window closing? Decrease in Green Party votes at new EU elections
12, 13, 14	Compliance with EU Directives																								Window opens: start 4th EU Water Framework + Floods + Habitats + Birds Directives reporting cycle					Window closes: end reporting cycles Water Framework, Flodds, Birds and Habitats Directives + WFD deadline to achieve 'good status'in case of technical infeasibility or disproportionale costs
15, 16	Establishment of (national) climate counciles										Windo opens: Establishment National Climate Council in the UK			Event: Establishment National Climate Council in Finland					Event: Estblishment National Climate Council Ireland		Event: Establishment National Climate Council in France and Sweden	Event: Establishment National Climate Council in Iceland and Germany	Event: National Climate Council in France now includes climate-adaptation related matters	Event: Formalization National Climate Council Ireland; Establishment of EU-wide Climate Council	Event: Establishment of Slovenia Climate Council under the 2022 Environmental Protection Act	Event: Establishment National Climate Council in the Netherlands; Climate Council in Finland is reformed
17	Successful pilots: floating/amphibious buildings							Window opens: Maasbommel (NL)					Event: Harnaschpolder Delft (NL: 2010s)	Event: Pavillion Rotterdam				Event: Aquadock Rotterdam (NL)	Event: Thames amphibious house (UK)			Event: Floating farm Rotterdam (NL) + Urban Rigger Copenhagen (DK)	Event: Schoonschip Amsterdam (NL)	Event: Floating office Rotterdam (NL)				Event: Nassauharbour Rotterdam (NL: in development)
18	Successful pilots: sand engine													Window opens: construction Zandmotor (NL)							Event: start construction Sandscaping (UK)
19, 20, 21, 22	Evidence of succesful adaptation: on farm diversification, artificial lakes, sustainable urban drainage, pavement watering, wetlands and marshes restoration/preservation																								Window opens: evidence of successful adaptation published in IPCC report
23	Successful pilots: Transitional polders																				Window opens: Start Dubbelijk project in Bierum (NL)			Event: NIOZ report published				Future event: Expected end Debbeldijk project, results may determine the opening of a new window/closing of this one
24	Successful pilots: Biogenic reefs																			Window opens: Start pilot project in de Penne (Belgium)			Event: End pilot project, follow up is planned
25	Post-disaster recovery: 2021 western Europe floods																							Window opens: 2021 West-European floods	Event: Expert panel commissioned in Belgium to write an advice on flood protection in Flanders
26	Post-disaster recovery: Greece wildfires									Window opens: Peloponnese wildifire											Event: Mati Island wildfire			Event: Evia Island wildfire; Appointment of new national minister for recovery from natural disasters; relief package from national government		Event: Mount Parintha wildfires
27	Post-disaster recovery: 2023 Slovenia floods		to support in being effective in obtaining adequate funding from available EU instruments to deal with the consequences of the event.																							Window opens: Slovenia flood, then declaration of state of emergency, amended Natural Disaster Recovery Act, emergency legislation, Reconstruction, Development and Financing act drafted; establishment of Flood Recovery Coordination Working Group + Post-flood and Landslide Reconstruction Office + Joint Task force with EU Commission and Slovenia representatives	Event: Draft proposal climate law 'Climate Act' (still to be accepted). Also includes a climate adaptation goal + creates legal basis for Climate Change Adaptation Strategy (NAS), regional climate change adaptation action plans for all regions in Slovenia, climate change adaptation reports, establishment of coordinators and of a climate council to define coordination of effective preparation of c…	Event (still ongoing): new national climate adaptation strategy is being developed
28	Climate action-related violations of EU convention on human rights																										Window opens: Press release judgement from European Human Rights court
29	Dutch national Groeifonds																															Window might open: Expected end of current Groeivonds projects, results will determine whether a new window will open
30	Successful pilots: Room for the river	Window opens: Launche of the Isarplan (Munich, Germany)	Event: start implementation Isarplan						Event: Start implementation Room for the river project (NL)					Event: End implementation Isarplan				Event: End implementation Room for the river project
31	Successful pilots: Water desalization							Window opens; Event: major investments in Spain
32	Follow-up extreme events: 2000 floods in the UK (taken)		Window opens: major floods across the UK			Event: summer drought; UKCIP also takes climate adaptation role		Event: update of the Nottingham Declaration on climate change mitigation and adaptation	Event: summer drought; Stern Report	Event: floods across the UK; Pitt Review (economic impact of climate change)	Event: Climate Change Bill, Climate Change Act; inclusion of the indicator 'preparing to adapt' in the 2008/2009 198 National Indicators (NIs) performance assessment framework for local authorites	This window closes around this time, but in 2008 new window opens with UK national climate council
33	Follow-up extreme events: 2001 floods and 2005-2007 storms in Sweden (taken)			Window opens: major floods impacted Stockholm and Gothenburg and several other cities in Sweden				Event: Gudrun Storm + start of first national climate and vulnerability assessment of climate change impacts in Sweden by new Swedish National Commission on Climate and Vulnerability, submitted to the government by 2007		Event: Per Storm;		Event: Climate Bill	Window closes around this time (taken)
34	Follow-up extreme events: Po River Floods in 2000-2008 and 2003 drought in Italy (missed)		Window opens: Po River Flood			Event: Po river drought				Event: national conference on adaptation, attempt to develop national adaptation strategy fails	Event: Po River Flood; Budget plan does not account for budget for developing a national climate adaptation strategy		Window closes around this time (missed)
