# Supplementary material for: Opportunities for advancing climate adaptation in Europe
Source: Research Square preprint supplement (doi:10.21203/rs.3.rs-7090828/v1), 2025-10-06
Supplement: Supplementary file 3 [file 5485477a41eff8283f4cc905.xlsx]

## Sheet: List of dams
GRAND_ID	RES_NAME	DAM_NAME	RIVER	NEAR_CITY	COUNTRY	SEC_CNTRY	YEAR	Time since construction (reference year: 2025)	Past end of life (2025)	Past end of life by 2030	Past end of life by 2040	Past end of life by 2050	Past end of life by 2100	DAM_HGT_M	DAM_LEN_M	AREA_REP	CAP_REP	DIS_AVG_LS	ELEV_MASL	MAIN_USE	COMMENTS	QUALITY	LONG_DD	LAT_DD	This product incorporates data from the GranD databased which is © Global Water System Project (2011).
2260		Saint Pierre la Manzo	Manche		France		1978	47	0	0	0	0	1	-99	-99	-99	14.6	111	54			3: Fair	-60.9354	14.5902
2549		Blanda Dam	Blanda	Blonduos	Iceland		1991	34	0	0	0	0	1	44	800	56	400	41227	452	Hydroelectricity		2: Good	-19.6813	65.2184
2550	Kvislavatn	Eyvindarver	Eyvindarverskvisl	Selfoss	Iceland		1984	41	0	0	0	0	1	30	730	24	150	4816	597	Hydroelectricity		3: Fair	-18.5687	64.5928
2551	Thorisvatn	Thorisos	Thorisos	Selfoss	Iceland		2001	24	0	0	0	0	0	33	1125	93	1180	17332	594	Hydroelectricity	The Vatnsfell dam (at south side of lake) releases water in winter only; year start operations from https://en.wikipedia.org/wiki/Vatnsfell_Power_Station	3: Fair	-18.7961	64.346
2552	Sultartangalon	Sultartangi	Tungnaa	Selfoss	Iceland		1983	42	0	0	0	0	1	22	6100	17	116	305638	284	Hydroelectricity		2: Good	-19.5479	64.194
2553	Hrauneyjalon	Hrauneyjafoss	Tungnaa	Selfoss	Iceland		1981	44	0	0	0	0	1	-99	-99	8.8	237.8	81824	406	Hydroelectricity		3: Fair	-19.2215	64.1873
2554	Krokslon	Sigalda	Tungnaa	Selfoss	Iceland		1977	48	0	0	0	0	1	44	932	19	195	80211	459	Hydroelectricity		2: Good	-19.1009	64.1604
2556	Shin	Lairg	Shin	Lairg	United Kingdom		1957	68	0	0	0	0	1	32	448	32.5	318	17386	106	Hydroelectricity		3: Fair	-4.4154	58.0297
2557		Vaich	Srath a'Bhathaich	Dingwall	United Kingdom		1957	68	0	0	0	0	1	29	257	1.5	11.2	1708	258	Hydroelectricity		3: Fair	-4.78124	57.7361
2558		Glascarnoch	Glasarnoch	Dingwall	United Kingdom		1957	68	0	0	0	0	1	30	534	10.9	78.2	3331	258	Hydroelectricity		2: Good	-4.77872	57.6968
2560		Luichart	Conon	Dingwall	United Kingdom		1954	71	0	0	0	0	1	16	219	6.6	62.3	18330	91	Hydroelectricity		2: Good	-4.69785	57.5851
2561		Orrin	Orrin	Dingwall	United Kingdom		1959	66	0	0	0	0	1	45	312	4.2	59.5	4670	242	Hydroelectricity		2: Good	-4.67037	57.5146
2562		Monar	Farrar	Beauly	United Kingdom		1963	62	0	0	0	0	1	35	161	74.7	141.5	6759	264	Hydroelectricity		3: Fair	-4.99543	57.409
2563		Mullardoch	Cannich	Beauly	United Kingdom		1951	74	0	0	0	0	1	37	727	9.4	233.1	5976	247	Hydroelectricity		3: Fair	-4.95695	57.3358
2565		Cluanie	Moriston	Fort Augustus	United Kingdom		1955	70	0	0	0	0	1	35	675	10.9	203	4329	196	Hydroelectricity		3: Fair	-5.00337	57.143
2566		Loyne	Loyne	Fort Augustus	United Kingdom		1956	69	0	0	0	0	1	18	549	6.2	45.3	3160	214	Hydroelectricity		3: Fair	-4.97439	57.1258
2567		Invergarry			United Kingdom		1956	69	0	0	0	0	1	13	-99	6.9	38.3	18811	107	Hydroelectricity		2: Good	-4.84906	57.0787
2568	Loch Quoich	Cruadhach	Gear Garry	Fort Augustus	United Kingdom		1956	69	0	0	0	0	1	39	320	19.2	382.8	7415	216	Hydroelectricity		3: Fair	-5.18694	57.0712
2569	Loch Lochy	Loch Lochy			United Kingdom		1846	179	1	0	0	0	0	8	-99	17.6	51.7	20196	31	Navigation		2: Good	-4.98514	56.9183
2570		Laggan	Spean	Fort William	United Kingdom		1936	89	0	0	1	0	0	40	213	10.3	39.6	14860	245	Hydroelectricity		2: Good	-4.67165	56.8905
2572		Dalwhinnie			United Kingdom		1938	87	0	0	1	0	0	14	-99	23.3	229.4	5290	356	Hydroelectricity	Two dams for this reservoir	3: Fair	-4.44115	56.7328
2573		Clunie	Tummel	Pitlochry	United Kingdom		1950	75	0	0	0	1	0	21	141	6.1	36.4	32173	161	Hydroelectricity		2: Good	-3.82799	56.7193
2574		Backwater	Backwater	Dundee	United Kingdom		1969	56	0	0	0	0	1	37	550	1.8	25	714	265	Water supply		2: Good	-3.22139	56.7162
2575		Blackwater	Leven	Kinlochleven	United Kingdom		1909	116	1	0	0	0	0	24	930	9.6	111.3	6408	305	Hydroelectricity		2: Good	-4.86277	56.7002
2576		Giorra	Allt Connait	Aberfeldy	United Kingdom		1959	66	0	0	0	0	1	30	463	2.9	42.8	1331	426	Hydroelectricity		2: Good	-4.43146	56.5846
2577	Lyon Loch	Lubreoch	Lyon	Aberfeldy	United Kingdom		1958	67	0	0	0	0	1	33	530	5	83	3396	340	Hydroelectricity		3: Fair	-4.51938	56.5433
2578		Lawers	Allt a'Mhoirneas	Killin	United Kingdom		1958	67	0	0	0	0	1	38	344	0.8	13	173	496	Hydroelectricity		2: Good	-4.27861	56.5247
2579		Lednock	Lednock	Crieff	United Kingdom		1958	67	0	0	0	0	1	33	290	1.7	30.1	630	344	Hydroelectricity		2: Good	-4.06632	56.4355
2580		Loch Turret	Turret Burn	Crieff	United Kingdom		1964	61	0	0	0	0	1	24	335	1.8	18.1	541	360	Water supply		2: Good	-3.91858	56.419
2581		Awe Barrage		United	United Kingdom		1962	63	0	0	0	0	1	13	-99	39	300	54884	85	Hydroelectricity		3: Fair	-5.14226	56.399
2582		Nant	Nant	Oban	United Kingdom		1962	63	0	0	0	0	1	23	372	2.3	30	1704	201	Hydroelectricity		3: Fair	-5.23545	56.3725
2583		Shira Main	Shira	Inveraray	United Kingdom		1959	66	0	0	0	0	1	41	725	1.4	22.5	734	321	Hydroelectricity		3: Fair	-4.96865	56.3394
2584		Sloy	Inveruglas Water	Dumbarton	United Kingdom		1951	74	0	0	0	0	1	49	357	1.3	35.7	787	270	Hydroelectricity		2: Good	-4.76565	56.2623
2585		Loch Arklet			United Kingdom		1914	111	1	0	0	0	0	8	-99	-99	12.3	1023	146	Water supply		2: Good	-4.65179	56.248
2586		Glen Finglas	Turk	Stirling	United Kingdom		1965	60	0	0	0	0	1	36	229	1.4	19	1755	158	Water supply		2: Good	-4.37308	56.2414
2587		Katrine			United Kingdom		1859	166	1	0	0	0	0	10	-99	-99	64.6	5216	138	Water supply		2: Good	-4.44064	56.233
2588		Loch Venacher			United Kingdom		1859	166	1	0	0	0	0	5	-99	-99	11.8	9800	85	Water supply		2: Good	-4.26412	56.2293
2589		Glashan	Glashan Burn	Inveraray	United Kingdom		1961	64	0	0	0	0	1	20	378	1.9	21.2	435	101	Hydroelectricity		2: Good	-5.34525	56.0816
2590		Carron Valley			United Kingdom		1938	87	0	0	1	0	0	13	-99	3.9	21.8	1915	214	Water supply		2: Good	-4.13049	56.0461
2591		Tarsan	Glen Tarsan Burn	Dunoon	United Kingdom		1953	72	0	0	0	0	1	22	344	1.1	13	633	110	Hydroelectricity		2: Good	-5.09636	56.0037
2592		Megget	Megget Water	Selkirk	United Kingdom		1982	43	0	0	0	0	1	56	568	2.6	66.2	1242	332	Water supply		3: Fair	-3.25335	55.4938
2593		Talla	Talla Water	Peebles	United Kingdom		1905	120	1	0	0	0	0	24	320	1.2	12.7	663	279	Water supply		2: Good	-3.41711	55.4918
2594		Camps	Camps Water	Lanark	United Kingdom		1930	95	0	1	0	0	0	29	268	0.8	9.1	697	330	Water supply		2: Good	-3.57999	55.4861
2595		Daer	Daer Water	Dumfries	United Kingdom		1980	45	0	0	0	0	1	42	793	2	25.4	1523	330	Water supply		2: Good	-3.61458	55.3635
2596		Loch Doon			United Kingdom		1936	89	0	0	1	0	0	14	-99	-99	83	4752	239	Hydroelectricity		2: Good	-4.39553	55.2838
2597		Bradan	Water of Girvan	Ayr	United Kingdom		1973	52	0	0	0	0	1	31	438	2.1	19.2	626	306	Recreation		2: Good	-4.46458	55.2505
2598	Bakethin Reservoir	Kielder	North Tyne	Newcastle upon Tyne	United Kingdom		1982	43	0	0	0	0	1	55	1140	10.9	199.2	6177	175	Water supply		3: Fair	-2.46154	55.1854
2599		Clatteringshaws	Blackwater of Dee	Dumfries	United Kingdom		1935	90	0	0	1	0	0	23	448	4.3	35.4	3660	173	Hydroelectricity		3: Fair	-4.27792	55.0535
2600		Derwent	Derwent	Consett	United Kingdom		1966	59	0	0	0	0	1	36	975	4	50	1913	219	Water supply		2: Good	-1.96042	54.8604
2601		Cow Green	Tees	Barnard Castle	United Kingdom		1970	55	0	0	0	0	1	26	572	3.1	40.9	1676	481	Water supply		2: Good	-2.29012	54.6575
2602		Selset	Lune	Barnard Castle	United Kingdom		1959	66	0	0	0	0	1	41	928	1.1	15.3	1843	312	Water supply		2: Good	-2.12845	54.5853
2603		Balderhead	Balder	Barnard Castle	United Kingdom		1964	61	0	0	0	0	1	52	914	1.2	19.7	550	305	Water supply		2: Good	-2.11191	54.5609
2604		Thirlmere	Derwent	Keswick	United Kingdom		1894	131	1	0	0	0	0	20	224	3.3	40.7	943	182	Water supply		2: Good	-3.06943	54.5595
2605		Haweswater	Eamont	Penrith	United Kingdom		1940	85	0	0	1	0	0	33	472	3.9	84.8	1056	221	Water supply		2: Good	-2.77059	54.5344
2607	Scar House Reservoir	Scar House	Nidd	Pateley Bridge	United Kingdom		1936	89	0	0	1	0	0	71	482	0.7	10.1	581	320	Water supply		2: Good	-1.89939	54.1883
2608		Silent Valley	Kilkeel	Kilkeel	United Kingdom		1933	92	0	0	1	0	0	27	1374	1	13.5	504	133	Water supply		2: Good	-6.00104	54.1286
2609		Gouthwaite	Nidd	Pateley Bridge	United Kingdom		1901	124	1	0	0	0	0	34	302	1.4	7.1	2753	139	Water supply		2: Good	-1.78679	54.1102
2610		Grimwith	Dibb	Pateley Bridge	United Kingdom		1986	39	0	0	0	0	1	49	994	1.5	21.8	666	275	Water supply		2: Good	-1.91358	54.0748
2611		Stocks	Hodder	Slaidburn	United Kingdom		1932	93	0	0	1	0	0	31	354	1.4	11.8	1414	165	Water supply		2: Good	-2.43056	53.9871
2612		Howden	Derwent	Hathersage	United Kingdom		1912	113	1	0	0	0	0	37	330	0.7	9	945	270	Recreation		2: Good	-1.74403	53.4314
2613		Derwent	Derwent	Hathersage	United Kingdom		1916	109	1	0	0	0	0	36	343	0.8	9.6	1352	229	Recreation		3: Fair	-1.7415	53.404
2614		Ladybower	Derwent	Hathersage	United Kingdom		1945	80	0	0	0	1	0	43	363	2	28.7	3337	174	Recreation		3: Fair	-1.70276	53.3665
2615		Llyn Cowlyd	Afon Ddu	Dolgarrog	United Kingdom		1920	105	1	0	0	0	0	25	350	1	10.8	192	364	Water supply		3: Fair	-3.89074	53.1512
2616		Pollaphuca	Liffey	Naas	Ireland		1939	86	0	0	1	0	0	32	101	20	184	7163	186	Hydroelectricity		3: Fair	-6.58003	53.1227
2617		Llyn Brenig	Afon Brenig	Denbigh	United Kingdom		1976	49	0	0	0	0	1	50	1200	3.7	61.5	613	377	Water supply		2: Good	-3.53953	53.0777
2618		Alwen	Alwen	Denbigh	United Kingdom		1916	109	1	0	0	0	0	30	122	1.5	14.5	717	377	Water supply		2: Good	-3.56196	53.0629
2619		Carsington	Derwent	Wirksworth	United Kingdom		1992	33	0	0	0	0	1	34	1200	3	35	261	189	Water supply		2: Good	-1.63839	53.0535
2620		Llyn Celyn	Tryweryn	Bala	United Kingdom		1965	60	0	0	0	0	1	58	701	3.5	81	2370	294	Water supply		3: Fair	-3.67302	52.9476
2621		Blithfield	Blithe	Rugeley	United Kingdom		1953	72	0	0	0	0	1	16	856	3.2	18.2	2094	96	Water supply		2: Good	-1.89392	52.8058
2622		Vyrnwy	Vyrnwy	Welshpool	United Kingdom		1892	133	1	0	0	0	0	26	335	4.5	59.7	2694	254	Recreation		2: Good	-3.45625	52.7646
2623	Lough Derg	Parteen Weir	Shannon	Limerick	Ireland		1930	95	0	1	0	0	0	16	4670	118	465	191177	27	Hydroelectricity	Lough Derg is a natural lake; at its outlet at Parteen Weir is Ardnacrusha hydropower station (85MW), which is part of the Shannon Scheme	2: Good	-8.47721	52.7622
2624	Rutland Water	Empingham	Gwash	Starrford	United Kingdom		1975	50	0	0	0	0	1	40	1200	12.6	124	758	75	Water supply		3: Fair	-0.607705	52.6592
2625		Clywedog	Clywedog	Llanidloes	United Kingdom		1967	58	0	0	0	0	1	65	183	2.5	50	1987	293	Recreation		2: Good	-3.60253	52.4737
2626		Nant-y-Moch	Afon Rheidol	Ponterwyd	United Kingdom		1962	63	0	0	0	0	1	56	350	2.6	28.4	2378	337	Hydroelectricity		3: Fair	-3.83646	52.4612
2627		Draycote	Trib. Leam	Rugby	United Kingdom		1969	56	0	0	0	0	1	21	1372	2.6	22.7	71	91	Water supply		2: Good	-1.33855	52.3198
2628		Pitsford	Nene	Northampton	United Kingdom		1956	69	0	0	0	0	1	26	521	3	17.5	497	95	Water supply		2: Good	-0.89231	52.3174
2629		Craig-Goch	Elan	Rhayader	United Kingdom		1904	121	1	0	0	0	0	41	156	0.9	9.2	2225	322	Water supply		2: Good	-3.62188	52.3075
2630		Diddington	Ouse	Bedford	United Kingdom		1964	61	0	0	0	0	1	25	1707	6.3	57.8	155	42	Water supply		2: Good	-0.286013	52.2899
2631		Caban Coch	Elan	Rhayader	United Kingdom		1904	121	1	0	0	0	0	44	186	2	35.5	7568	250	Water supply		2: Good	-3.57861	52.2671
2632		Claerwen	Claerwen	Rhayader	United Kingdom		1952	73	0	0	0	0	1	67	355	2.6	48.3	2644	370	Water supply		2: Good	-3.65937	52.2609
2633		Llyn Brianne	Towy	Llandovery	United Kingdom		1972	53	0	0	0	0	1	91	274	2.1	60	3563	285	Water supply		3: Fair	-3.76458	52.1236
2634		Usk	Usk	Brecon	United Kingdom		1955	70	0	0	0	0	1	33	480	1.2	12.3	608	286	Water supply		2: Good	-3.69983	51.946
2635		Carrigadrohid	Lee	Macroom	Ireland		1955	70	0	0	0	0	1	22	107	9	50	27371	67	Hydroelectricity		2: Good	-8.86563	51.8975
2636		Talybont	Caerfanell	Brecon	United Kingdom		1939	86	0	0	1	0	0	30	427	1.3	11.7	984	180	Water supply		2: Good	-3.30208	51.8753
2637		Chew Stoke			United Kingdom		1956	69	0	0	0	0	1	13	-99	4.9	20.5	1215	50	Water supply		2: Good	-2.61841	51.3505
2638		Wimbleball	Haddeo	Tiverton	United Kingdom		1978	47	0	0	0	0	1	63	300	1.6	21.6	722	252	Water supply		2: Good	-3.47559	51.0546
2639		Roadford	Wolf	Launceston	United Kingdom		1989	36	0	0	0	0	1	44	430	3	37	1021	126	Water supply		2: Good	-4.23525	50.6899
2640		Colliford Water	St. Neots	Bodmin	United Kingdom		1983	42	0	0	0	0	1	29	520	3.7	29.1	418	245	Water supply		2: Good	-4.56923	50.5115
2641		Stithians	Kennal	Redruth	United Kingdom		1965	60	0	0	0	0	1	42	241	1.1	5.4	223	166	Water supply		2: Good	-5.19905	50.1843
2642		Vezins	Selune	Avranches	France		1932	93	0	0	1	0	0	36	278	2	19	17219	63	Hydroelectricity		3: Fair	-1.23229	48.5769
2643		Saint Michel	Ellez	Morlaix	France		1937	88	0	0	1	0	0	15	345	4.8	13.4	1124	228	Hydroelectricity		2: Good	-3.87895	48.3545
2644		Guerledan	Blavet	Pontivy	France		1930	95	0	1	0	0	0	54	206	3	49.8	17483	93	Hydroelectricity		2: Good	-3.01721	48.1952
2645		Puy Terrier	Cebron	Parthenay	France		1982	43	0	0	0	0	1	26	460	2	11.5	1657	114	Water supply		3: Fair	-0.194456	46.7721
2646		Mervent	Vendee	Fontenay le Comte	France		1956	69	0	0	0	0	1	29	105	1.3	8.3	6082	58	Water supply		2: Good	-0.782357	46.5142
2647		Touche Poupard	Chambon	Niort	France		1994	31	0	0	0	0	1	36	200	1.5	15	831	121	Water supply		2: Good	-0.202596	46.4614
2648		Arbon	Navia	Coana	Spain		1967	58	0	0	0	0	1	32	180	2.7	32.8	56878	46	Hydroelectricity		3: Fair	-6.72187	43.4769
2649		La Ribeira	Eume	As Pontes de Garcia Rodriguez	Spain		1961	64	0	0	0	0	1	54	280	1.6	32.8	3526	396	Hydroelectricity		3: Fair	-7.82711	43.4611
2650		Eume	Eume	A Capela	Spain		1960	65	0	0	0	0	1	103	284	4.3	123	10588	316	Hydroelectricity		2: Good	-8.00974	43.4055
2651		Doiras	Navia	Boal	Spain		1934	91	0	0	1	0	0	98	165	4.5	114.7	51257	115	Hydroelectricity		2: Good	-6.82737	43.3857
2652		Cecebre	Mero	Betanzos	Spain		1976	49	0	0	0	0	1	23	220	3.6	21.7	7609	42	Water supply		2: Good	-8.2963	43.2816
2653		Salime	Navia	Grandas de Salime	Spain		1956	69	0	0	0	0	1	134	250	6.8	265.6	38065	214	Hydroelectricity		2: Good	-6.84919	43.2348
2654		Tanes	Nalon	Caso	Spain		1978	47	0	0	0	0	1	95	195	1.4	33.3	7217	492	Hydroelectricity		3: Fair	-5.42306	43.2176
2655		Anarbe	Anarbe	Arano	Spain		1976	49	0	0	0	0	1	78	229	2	43.6	386	147	Water supply		3: Fair	-1.87715	43.2148
2656		Ordunte	Ordunte	Valle de Mena	Spain		1934	91	0	0	1	0	0	56	376	1.4	22.2	1103	301	Water supply		2: Good	-3.28437	43.1593
2657		La Cohilla	Nansa	Tudanca	Spain		1950	75	0	0	0	1	0	116	284	0.5	12.3	1808	756	Hydroelectricity		3: Fair	-4.39062	43.131
2658		Villagudin	Veduido	Tordoia	Spain		1981	44	0	0	0	0	1	33	498	1.7	18.3	2984	264	Hydroelectricity		3: Fair	-8.49494	43.0954
2659		Alsa	Torina	San Miguel de Aguayo	Spain		1921	104	1	0	0	0	0	49	190	1.8	22.9	395	833	Hydroelectricity		2: Good	-3.99724	43.0932
2660		Fervenza	Jallas	Mazaricos	Spain		1966	59	0	0	0	0	1	32	118	12.5	104	10351	292	Hydroelectricity		3: Fair	-9.00917	42.9893
2661		Irabia	Irati	Ochagavia	Spain		1925	100	1	0	0	0	0	44	158	0.9	13.6	3245	831	Hydroelectricity		2: Good	-1.156	42.987
2662		Ebro	Ebro	Las Rozas de Valdearroyo	Spain		1945	80	0	0	0	1	0	34	216	62.5	540	8511	833	Irrigation		3: Fair	-4.05101	42.9707
2663		Eugui	Arga	Esteribar	Spain		1971	54	0	0	0	0	1	51	252	1.2	21.9	1879	621	Irrigation		2: Good	-1.5145	42.9738
2664		Urrunaga	Santa Engracia	Legutiano	Spain		1957	68	0	0	0	0	1	31	490	7.8	72	2930	536	Water supply		3: Fair	-2.65207	42.9579
2665		Riano	Esla	Cremenes	Spain		1988	37	0	0	0	0	1	101	337	23	664	13397	1089	Irrigation		3: Fair	-5.08133	42.9358
2666		Juan Benet	Porma	Bonar	Spain		1968	57	0	0	0	0	1	78	251	11.5	317.3	4841	1081	Irrigation		3: Fair	-5.28958	42.9312
2667		Ullivarri	Zadorra	Arrazua-Ubarrundia	Spain		1957	68	0	0	0	0	1	37	535	14.9	147	6696	544	Water supply		3: Fair	-2.61563	42.9315
2668		Santa Eugenia	Jallas	Dumbria	Spain		1988	37	0	0	0	0	1	80	288	0.7	13.6	20183	211	Water supply		2: Good	-9.10091	42.9188
2669		Requejada	Pisuerga	Cervera de Pisuerga	Spain		1940	85	0	0	1	0	0	58	200	3.6	65	4423	1045	Irrigation		3: Fair	-4.52949	42.9081
2670		Camporredondo	Carrion	Velilla del Rio Carrion	Spain		1930	95	0	1	0	0	0	76	160	3.9	69.7	4133	1283	Irrigation		2: Good	-4.73465	42.9019
2671		Cervera	Ribera	Cervera de Pisuerga	Spain		1923	102	1	0	0	0	0	37	130	1.1	10.2	901	1035	Irrigation		3: Fair	-4.52898	42.8665
2672		Barrie de la Maza	Tambre	Brion	Spain		1958	67	0	0	0	0	1	48	159	2.7	31.5	51097	117	Hydroelectricity		3: Fair	-8.79625	42.8655
2673		Compuerto	Carrion	Velilla del Rio Carrion	Spain		1960	65	0	0	0	0	1	78	273	3.8	94.9	5412	1178	Irrigation		2: Good	-4.82753	42.8619
2674		Portodemouros	Ulla	Arzua	Spain		1967	58	0	0	0	0	1	93	469	12.1	297	31282	245	Hydroelectricity		3: Fair	-8.18826	42.8571
2675		Barrios de Luna	Orbigo-Luna	Los Barrios de Luna	Spain		1956	69	0	0	0	0	1	97	229	13	308	8953	1053	Irrigation		3: Fair	-5.86268	42.8499
2676		Matalavilla	Valseco	Paramo de Sil	Spain		1967	58	0	0	0	0	1	115	215	1.9	65	1706	928	Hydroelectricity		3: Fair	-6.45076	42.8357
2677	Itoiz Reservoir	Itoiz Dam	Irati	Longuida	Spain		2003	22	0	0	0	0	0	128	525	11	418	13169	516	Irrigation	Work on the dam has started in 1993, but due to controversy it has only been finished in 2003	2: Good	-1.3615	42.8029
2678		Aguilar de Campoo	Pisuerga	Aguilar de Campoo	Spain		1963	62	0	0	0	0	1	48	500	17.7	247.2	8381	910	Irrigation		3: Fair	-4.28729	42.7955
2679		Lanuza	Gallego	Lanuza	Spain		1978	47	0	0	0	0	1	80	176	1.1	25	1946	1259	Water supply		3: Fair	-0.314441	42.7523
2680		Alloz	Salado	Yerri	Spain		1930	95	0	1	0	0	0	67	74	9.3	84.3	3109	452	Irrigation		3: Fair	-1.94418	42.7072
2681		Bubal	Gallego	Hoz de Jaca	Spain		1971	54	0	0	0	0	1	90	195	2.3	64.3	4578	1074	Irrigation		3: Fair	-0.316038	42.6824
2682		Vilasouto	Mao	O Incio	Spain		1969	56	0	0	0	0	1	59	336	1.1	20.5	1025	451	Irrigation		2: Good	-7.42229	42.6618
2683		Belesar	Mino	Chantada	Spain		1963	62	0	0	0	0	1	129	600	18.3	645.6	91916	335	Hydroelectricity		3: Fair	-7.71465	42.6304
2684		Yesa	Aragon	Yesa	Spain		1960	65	0	0	0	0	1	77	398	20.9	446.9	66214	485	Irrigation		3: Fair	-1.18087	42.6152
2685		Barcena	Sil	Ponferrada	Spain		1960	65	0	0	0	0	1	109	166	9.9	341.5	16469	610	Irrigation		3: Fair	-6.55871	42.5777
2686		Los Peares	Mino	Carballedo	Spain		1955	70	0	0	0	0	1	94	261	6	182	95069	170	Hydroelectricity		2: Good	-7.72435	42.4659
2687		San Esteban	Sil	Nogueira de Ramuin	Spain		1955	70	0	0	0	0	1	115	295	7.4	213.2	135393	231	Hydroelectricity		2: Good	-7.64736	42.4138
2688		Albarellos	Avia	Leiro	Spain		1972	53	0	0	0	0	1	90	285	3.1	90.7	6585	305	Hydroelectricity		3: Fair	-8.19487	42.4004
2689		La Pena	Gallego	Las Penas de Riglos	Spain		1913	112	1	0	0	0	0	59	112	3.2	15.4	23359	539	Irrigation		3: Fair	-0.734375	42.3846
2690		Velle	Mino	Ourense	Spain		1966	59	0	0	0	0	1	27	195	2.6	17	243717	115	Hydroelectricity		3: Fair	-7.85195	42.3611
2691		Eiras	Oitaven	Fornelos	Spain		1977	48	0	0	0	0	1	51	191	1.5	22.2	4905	249	Water supply		2: Good	-8.48845	42.3469
2692		Prada	Jares	A Veiga	Spain		1958	67	0	0	0	0	1	85	286	6.1	122	4843	835	Hydroelectricity		2: Good	-7.03854	42.3094
2693		Uzquiza	Arlanzon	Villasur de Herreros	Spain		1988	37	0	0	0	0	1	65	460	3.1	75	1765	1090	Water supply		3: Fair	-3.36729	42.3053
2694		Castrelo	Mino	Ribadavia	Spain		1969	56	0	0	0	0	1	29	173	5.6	60.2	254809	88	Hydroelectricity		3: Fair	-8.11458	42.2943
2695		Arlanzon	Arlanzon	Villasur de Herreros	Spain		1933	92	0	0	1	0	0	47	267	1.2	22.4	1217	1120	Water supply		3: Fair	-3.34063	42.2631
2696		Chandreja	Navea	Chandrexa de Queixa	Spain		1953	72	0	0	0	0	1	85	236	2.5	60.6	2362	894	Hydroelectricity		2: Good	-7.38958	42.2604
2697		Bao	Bibey	O Bolo	Spain		1960	65	0	0	0	0	1	107	257	8.2	238.1	12677	690	Hydroelectricity		2: Good	-7.16563	42.2423
2698		Cenza	Cenza	Vilarino de Conso	Spain		1993	32	0	0	0	0	1	49	609	2.4	43	387	1330	Hydroelectricity		2: Good	-7.24823	42.1978
2699		Gonzalez Lacasa	Albercos	Ortigosa	Spain		1962	63	0	0	0	0	1	71	316	1.5	32.9	456	973	Irrigation		3: Fair	-2.67375	42.1742
2700		Mansilla	Najerilla	Mansilla	Spain		1960	65	0	0	0	0	1	80	209	2.5	67.7	2508	927	Irrigation		2: Good	-2.91458	42.1561
2701		Frieira	Mino	Crecente	Spain		1970	55	0	0	0	0	1	33	194	4.7	44.4	299083	71	Hydroelectricity		3: Fair	-8.1919	42.156
2702		San Sebastian	Bibey	Porto	Spain		1959	66	0	0	0	0	1	60	292	1.9	45	2107	1187	Irrigation		2: Good	-6.94666	42.1445
2703		Las Portas	Camba	Vilarino de Conso	Spain		1974	51	0	0	0	0	1	141	476	11.8	535.7	2903	872	Hydroelectricity		3: Fair	-7.21122	42.1143
2704		La Sotonera	Soton	Alcala de Gurrea	Spain		1963	62	0	0	0	0	1	34	3870	18.1	181.6	1732	413	Irrigation		3: Fair	-0.664616	42.1112
2705		Pias	Bibey	Viana do Bolo	Spain		1961	64	0	0	0	0	1	47	260	0.7	9.8	3048	1021	Hydroelectricity		2: Good	-6.99201	42.1034
2706		Pajares	Piqueras	Lumbreras	Spain		1994	31	0	0	0	0	1	77	420	1.6	35	819	1200	Water supply		2: Good	-2.60892	42.0881
2707		Cernadilla	Tera	Cernadilla	Spain		1969	56	0	0	0	0	1	-99	388	13.9	255.4	9939	882	Hydroelectricity		3: Fair	-6.46083	42.0195
2708		Valparaiso	Tera	Mombuey	Spain		1988	37	0	0	0	0	1	64	540	12.2	168.5	11978	830	Hydroelectricity		3: Fair	-6.27403	41.9936
2709		Nuestra Senora del Agavanzal	Tera	Rionegro del Puente	Spain		1995	30	0	0	0	0	1	42	521	3.6	35.9	17793	785	Hydroelectricity		3: Fair	-6.14381	41.9771
2710		Las Conchas	Limia	Lobios	Spain		1949	76	0	0	0	1	0	48	304	6.5	80	18949	533	Hydroelectricity		3: Fair	-8.03347	41.9442
2711		Salas	Salas	Muinos	Spain		1971	54	0	0	0	0	1	50	1005	6.9	86.7	3957	823	Hydroelectricity		3: Fair	-7.94201	41.9253
2712		Cuerda del Pozo	Duero	Vinuesa	Spain		1941	84	0	0	0	1	0	40	425	21.8	229	2947	1073	Irrigation		3: Fair	-2.70368	41.8754
2713		Alto Lindoso	Lima	Braga	Portugal		1993	32	0	0	0	0	1	110	297	10.2	390	38944	321	Hydroelectricity		3: Fair	-8.20107	41.8736
2714		Touvedo	Lima	Braga	Portugal		1993	32	0	0	0	0	1	43	134	1.7	15.5	45088	79	Hydroelectricity		3: Fair	-8.35229	41.8129
2715	Barragem de Paradela	Paradela	Cavado	Chaves	Portugal		1958	67	0	0	0	0	1	110	540	3.8	164.5	5985	697	Hydroelectricity		2: Good	-7.9504	41.7699
2716		Vilarinho das Furnas	Homem	Braga	Portugal		1972	53	0	0	0	0	1	94	385	3.5	118	1901	547	Hydroelectricity		2: Good	-8.20612	41.7651
2717		Alto Rabagao	Rabagao	Chaves	Portugal		1964	61	0	0	0	0	1	94	1897	22	568.7	2664	833	Hydroelectricity		3: Fair	-7.85849	41.7415
2718	Albufeira de Salamonde	Salamonde	Cavado	Braga	Portugal		1953	72	0	0	0	0	1	75	284	2.4	65	17010	290	Hydroelectricity		2: Good	-8.08835	41.6926
2719		Venda Nova	Rabagao	Guimaraes	Portugal		1951	74	0	0	0	0	1	97	294	4	94.5	6379	690	Hydroelectricity		3: Fair	-7.98229	41.6768
2720	Albufeira da Canicada	Canicada	Cavado	Braga	Portugal		1955	70	0	0	0	0	1	76	246	6.9	170.6	22224	154	Hydroelectricity		2: Good	-8.22955	41.6521
2721		Guilhofrei	Ave	Guimaraes	Portugal		1938	87	0	0	1	0	0	49	190	1.6	21.2	3724	332	Hydroelectricity		3: Fair	-8.13797	41.5872
2722		Maidevera Saddle Dam 1	Aranda	Aranda de Moncayo	Spain		1981	44	0	0	0	0	1	54	318	1.3	18.3	75	796	Irrigation		3: Fair	-1.75937	41.5776
2723		Castro	Duero	Alcanices	Spain	Portugal	1961	64	0	0	0	0	1	55	136	1.7	27.3	277312	590	Hydroelectricity	River barrage; no proper reservoir	3: Fair	-6.18438	41.5766
2724		Azibo	Azibo	Braganga	Portugal		1982	43	0	0	0	0	1	56	551	4.1	54.5	1142	582	Irrigation		3: Fair	-6.89062	41.5579
2725		Ricobayo	Esla	Muelas de Pan	Spain		1934	91	0	0	1	0	0	100	270	58.5	1200	147569	651	Hydroelectricity		3: Fair	-5.98416	41.528
2726		Linares del Arroyo	Riaza	Maderuelo	Spain		1951	74	0	0	0	0	1	36	112	5.5	58.1	2499	917	Irrigation		3: Fair	-3.55558	41.5256
2727		Miranda	Douro	Miranda do Douro	Portugal		1961	64	0	0	0	0	1	80	263	1.2	28	274868	582	Hydroelectricity		3: Fair	-6.26605	41.4927
2728		Villalcampo	Duero	Villalcampo	Spain		1949	76	0	0	0	1	0	50	300	4.5	66.5	281850	621	Hydroelectricity		2: Good	-6.08409	41.4926
2729		Monteagudo de las Vicarias	Najima	Monteagudo de las Vicarias	Spain		1982	43	0	0	0	0	1	12	471	1.3	9.7	54	829	Irrigation		2: Good	-2.19203	41.3895
2730		Picote	Douro	Miranda do Dou	Portugal	Spain	1958	67	0	0	0	0	1	100	139	2.1	62.8	276751	574	Hydroelectricity		3: Fair	-6.34792	41.3795
2731		Burgomillodo	Duraton	Carrascal del Rio	Spain		1953	72	0	0	0	0	1	44	114	2.6	14.5	2471	879	Hydroelectricity		3: Fair	-3.88021	41.3354
2732		Bemposta	Douro	Miranda do Douro	Portugal		1964	61	0	0	0	0	1	87	297	4.3	128.8	277691	402	Hydroelectricity		3: Fair	-6.46812	41.3015
2733	Almendra	Almendra	Tormes	Almendra	Spain		1970	55	0	0	0	0	1	202	567	86.5	2648.6	32737	690	Hydroelectricity		3: Fair	-6.32167	41.2739
2734		La Tranquera	Piedra	Carenas	Spain		1960	65	0	0	0	0	1	81	225	5.5	83.7	1638	663	Irrigation		3: Fair	-1.79933	41.2628
2735		Aldeadavila	Duero	Aldeadavila de la Ribera	Spain	Portugal	1963	62	0	0	0	0	1	140	250	3.7	114.8	313993	418	Hydroelectricity		3: Fair	-6.68442	41.2134
2736		Valeira	Douro	Vila Real	Portugal		1975	50	0	0	0	0	1	48	380	8	97	418371	114	Hydroelectricity		3: Fair	-7.37396	41.159
2737		Crestuma	Douro	Porto	Portugal		1985	40	0	0	0	0	1	60	470	14.2	110	674462	8	Hydroelectricity		3: Fair	-8.6432	41.1469
2738		Regua	Douro	Lamego	Portugal		1973	52	0	0	0	0	1	42	310	4.8	95	493291	84	Hydroelectricity		2: Good	-7.73904	41.1466
2739		Pocinho	Douro	Pinhel	Portugal		1982	43	0	0	0	0	1	49	430	8.3	83.1	379775	118	Hydroelectricity		3: Fair	-7.1129	41.135
2740		Varosa	Varosa	Lamego	Portugal		1976	49	0	0	0	0	1	76	213	0.7	14.5	6083	258	Hydroelectricity		3: Fair	-7.77661	41.1183
2741		Torrao	Tamega	Penafiel	Portugal		1988	37	0	0	0	0	1	69	218	6.5	124	74743	69	Hydroelectricity		3: Fair	-8.25958	41.0973
2742		Carrapatelo	Douro	Penafiel	Portugal		1972	53	0	0	0	0	1	57	450	9.5	148.4	525262	32	Hydroelectricity		3: Fair	-8.13028	41.0866
2743		Palmaces	Canamares	Palmaces de Jadraque	Spain		1954	71	0	0	0	0	1	40	128	3	31.4	994	879	Irrigation		3: Fair	-2.93882	41.0524
2744		Saucelle	Duero	Saucelle	Spain		1956	69	0	0	0	0	1	83	178	5.8	181.5	313146	198	Hydroelectricity		3: Fair	-6.80208	41.0484
2745		Alcorlo	Bornova	Alcorlo	Spain		1978	47	0	0	0	0	1	73	250	6	180	1331	917	Irrigation		2: Good	-3.02373	41.0112
2746		El Vado	Jarama	Valdesotos	Spain		1954	71	0	0	0	0	1	69	178	2.6	55.7	1445	913	Water supply		2: Good	-3.2979	41.0063
2747		Puentes Viejas	Lozoya	Puentes Viejas	Spain		1940	85	0	0	1	0	0	66	324	2.8	49.2	3097	954	Water supply		2: Good	-3.5736	40.9929
2748		Vilar	Tavora	Lamego	Portugal		1965	60	0	0	0	0	1	58	240	6.7	99.8	5390	548	Hydroelectricity		3: Fair	-7.53583	40.9847
2749		Riosequillo	Lozoya	Buitrago del Lozoya	Spain		1956	69	0	0	0	0	1	56	1060	3.3	48.5	1973	982	Water supply		3: Fair	-3.64917	40.984
2750		Cueva Foradada	Martin	Oliete	Spain		1926	99	0	1	0	0	0	65	113	3.5	26.3	148	584	Hydroelectricity		2: Good	-0.694209	40.9837
2751		El Villar	Lozoya	Puentes Viejas	Spain		1882	143	1	0	0	0	0	50	107	1.4	22.5	3341	923	Water supply		2: Good	-3.56272	40.9495
2752		La Pinilla	Lozoya	Pinilla del Valle	Spain		1967	58	0	0	0	0	1	33	295	4.8	37.5	1116	1088	Water supply		2: Good	-3.77709	40.9447
2753		Belena	Sorbe	Cogolludo	Spain		1982	43	0	0	0	0	1	57	530	2.5	50.5	1744	836	Water supply		3: Fair	-3.19792	40.9363
2754		Calanda	Guadalope	Calomarde	Spain		1982	43	0	0	0	0	1	63	293	3.1	54.8	3074	427	Hydroelectricity		3: Fair	-0.211912	40.9137
2755		El Atazar	Lozoya	Patones	Spain		1972	53	0	0	0	0	1	134	484	10.7	426	4292	889	Irrigation		2: Good	-3.47464	40.913
2757		Santolea	Guadalope	Castellote	Spain		1932	93	0	0	1	0	0	51	138	3.9	52.5	846	615	Irrigation		2: Good	-0.317708	40.7675
2759		Las Cogotas	Adaja	Mingorria	Spain		1993	32	0	0	0	0	1	67	299	2.8	58.6	3402	1034	Water supply		3: Fair	-4.69806	40.7229
2760		Navacerrada	Navacerrada		Spain		1968	57	0	0	0	0	1	-99	-99	-99	11	96	1140			3: Fair	-4.00729	40.7151
2761		Santillana	Manzanares	Manzanares el Real	Spain		1978	47	0	0	0	0	1	40	1355	10.5	91.1	1260	878	Water supply		2: Good	-3.81796	40.7078
2762		Santa Teresa Saddle Dam	Tormes	Montejo	Spain		1960	65	0	0	0	0	1	59	504	26.6	496	16788	879	Irrigation		3: Fair	-5.59896	40.6644
2763		La Acena	Acena		Spain		1989	36	0	0	0	0	1	-99	-99	-99	23.7	158	1299			3: Fair	-4.22403	40.6147
2764		El Pardo	Manzanares	El Pardo	Spain		1970	55	0	0	0	0	1	35	830	5.5	45	2786	621	Other		2: Good	-3.79062	40.5405
2765		Valmayor	Aulencia	Valdemorillo	Spain		1975	50	0	0	0	0	1	60	1215	7.5	124	430	827	Water supply		3: Fair	-4.04871	40.5351
2766		Agueda	Agueda	Zamarra	Spain		1931	94	0	0	1	0	0	38	196	1.8	22.4	7756	667	Irrigation		3: Fair	-6.48083	40.5296
2767		Entrepenas	Tajo	Aunon	Spain		1956	69	0	0	0	0	1	87	383	32.1	802.6	10223	719	Irrigation		3: Fair	-2.74771	40.4926
2768		El Burguillo	Alberche	El Tiemblo	Spain		1913	112	1	0	0	0	0	91	300	9.1	208	6955	743	Irrigation		3: Fair	-4.53667	40.4243
2769	Buendia	Buendia	Guadiela	Buendia	Spain		1957	68	0	0	0	0	1	79	351	81.9	1638.7	7633	700	Irrigation		3: Fair	-2.78097	40.399
2770				San Martin de Valdeiglesias	Spain		1955	70	0	0	0	0	1	78	230	6.5	148.3	10149	541	Irrigation		3: Fair	-4.31215	40.3738
2771		Arquillo de San Blas	Guadalaviar	Teruel	Spain		1960	65	0	0	0	0	1	54	173	0.8	22	1621	986	Irrigation		2: Good	-1.2071	40.3633
2772		Bolarque	Tajo	Almonacid de Zorita	Spain		1910	115	1	0	0	0	0	46	292	4.9	30.7	18019	702	Irrigation		2: Good	-2.81738	40.3631
2773		Aguieira	Mondego	Coimbra	Portugal		1981	44	0	0	0	0	1	89	400	20	430	55003	73	Hydroelectricity		2: Good	-8.19629	40.3413
2774		Picadas	Alberche	San Martin de Valdeiglesias	Spain		1952	73	0	0	0	0	1	59	145	0.9	15.2	10321	529	Irrigation		2: Good	-4.25104	40.336
2775		Sabugal	Coa	Sabugal	Portugal		2000	25	0	0	0	0	1	58	1005	7.3	114.3	1410	768			3: Fair	-7.08952	40.3312
2776		Raiva	Mondego	Coimbra	Portugal		1981	44	0	0	0	0	1	36	200	3	24.1	59592	69	Irrigation		3: Fair	-8.24664	40.3103
2777		Meimoa	Meimoa	Covilha	Portugal		1985	40	0	0	0	0	1	56	656	2.2	39	703	533	Irrigation		3: Fair	-7.14229	40.262
2778		Fronhas	Alva	Coimbra	Portugal		1986	39	0	0	0	0	1	62	250	5.3	89	10118	130	Hydroelectricity		3: Fair	-8.16466	40.2446
2779		Gabriel Y. Galan	Alagon	Guijo de Granadilla	Spain		1961	64	0	0	0	0	1	73	1020	46.8	924.2	15229	372	Irrigation		3: Fair	-6.13126	40.2234
2780		Rivera de Gata Main Dam	Gata	Villasbuenas de Gata	Spain		1990	35	0	0	0	0	1	61	356	3.1	48.9	1836	337	Irrigation		3: Fair	-6.63229	40.1364
2781		Borbollon	Arrago	Santibanez el Alto	Spain		1954	71	0	0	0	0	1	35	225	8.9	85	3232	309	Irrigation		3: Fair	-6.57622	40.1276
2782		Rosarito	Tietar	Oropesa	Spain		1958	67	0	0	0	0	1	38	123	14.7	84.7	16360	325	Irrigation		3: Fair	-5.3215	40.1089
2783		Valdeobispo	Alagon	Valdeobispo	Spain		1965	60	0	0	0	0	1	57	135	3.6	53	20737	297	Irrigation		3: Fair	-6.25028	40.0997
2784		Santa Luzia	Unhais	Covilha	Portugal		1942	83	0	0	0	1	0	76	178	2.5	53.7	687	636	Hydroelectricity		3: Fair	-7.85851	40.0906
2785		Arenos	Mijares	Montanejos	Spain		1978	47	0	0	0	0	1	107	428	3.9	137.7	2130	554	Irrigation	Polygon too small?	3: Fair	-0.549716	40.0869
2786		Jerte	Jerte	Plasencia	Spain		1985	40	0	0	0	0	1	43	503	6.7	58.5	3731	349	Water supply		3: Fair	-6.04214	40.0616
2787		Navalcan	Guadyerbas	Navalcan	Spain		1977	48	0	0	0	0	1	26	183	7.5	33.9	2762	368	Irrigation		3: Fair	-5.14062	40.047
2788		Maria Cristina	La Viuda	Alcora	Spain		1920	105	1	0	0	0	0	59	318	3.3	19.7	3502	120	Irrigation		3: Fair	-0.160542	40.031
2789		Sichar	Mijares	Onda	Spain		1960	65	0	0	0	0	1	58	165	3.2	49.3	5186	149	Irrigation		3: Fair	-0.230208	40.0116
2790		Idanha	Ponsul	Castelo Branco	Portugal		1949	76	0	0	0	1	0	54	140	6.8	77.8	3572	247	Irrigation		3: Fair	-7.19716	39.9487
2791		Cabril	Zezere	Coimbra	Portugal		1954	71	0	0	0	0	1	136	290	20.2	720	32441	265	Hydroelectricity		3: Fair	-8.13081	39.919
2792		Bouqa	Zezere	Tomar	Portugal		1955	70	0	0	0	0	1	65	175	1.9	48.4	34845	190	Hydroelectricity		3: Fair	-8.2175	39.8514
2793		Torrejon Tietar	Tietar	Serradilla	Spain		1967	58	0	0	0	0	1	30	227	2.2	22	43868	228	Hydroelectricity		3: Fair	-5.99011	39.8399
2794		Castrejon	Tajo	La Puebla de Montalban	Spain		1967	58	0	0	0	0	1	26	1440	7.5	41	76582	423	Irrigation		3: Fair	-4.28988	39.8401
2795		Torrejon Tajo	Tajo	Toril	Spain		1966	59	0	0	0	0	1	62	380	10.4	176.3	119654	284	Hydroelectricity		3: Fair	-5.98479	39.8334
2796		Guajaraz	Guajaraz	Arges	Spain		1971	54	0	0	0	0	1	47	332	1.6	18.1	484	600	Water supply		3: Fair	-4.08625	39.7974
2797		Arrocampo	Arrocampo	Romangordo	Spain		1976	49	0	0	0	0	1	36	225	7.7	35.5	773	254	Hydroelectricity		3: Fair	-5.73021	39.7867
2798	Valdecanas	Valdecanas	Tajo	Belvis de Monroy	Spain		1964	61	0	0	0	0	1	98	290	73	1446	114568	310	Irrigation		3: Fair	-5.60935	39.7781
2800		Alcantara 2	Tajo	Alcantara	Spain		1969	56	0	0	0	0	1	135	570	104	3162	236677	195	Hydroelectricity		3: Fair	-6.88457	39.7316
2801		Benageber	Turia	Benageber	Spain		1955	70	0	0	0	0	1	110	227	12.1	221.3	4271	514	Irrigation		3: Fair	-1.09901	39.7281
2803		Cedillo	Tajo	Cedillo	Spain	Portugal	1975	50	0	0	0	0	1	66	418	14	260	284180	115	Hydroelectricity		2: Good	-7.53845	39.6656
2804		Finisterre	Algodor	Tembleque	Spain		1977	48	0	0	0	0	1	34	712	12	133	1172	688	Other		2: Good	-3.65263	39.6489
2805		Alarcon	Jucar	Alarcon	Spain		1955	70	0	0	0	0	1	71	317	68.4	1112	9156	786	Irrigation		3: Fair	-2.11046	39.5688
2806		Pracana	Ocreza	Abrantes	Portugal		1951	74	0	0	0	0	1	60	255	4.6	116.5	14006	115	Hydroelectricity		3: Fair	-7.81	39.5656
2807		Contreras	Cabriel	Minglanilla	Spain		1975	50	0	0	0	0	1	129	241	27.1	874	8750	641	Hydroelectricity		3: Fair	-1.50099	39.5448
2808		Castelo do Bode	Zezere	Tomar	Portugal		1951	74	0	0	0	0	1	115	402	32.9	1095	49379	108	Hydroelectricity		3: Fair	-8.31833	39.5439
2809		Fratel	Tejo	Portalegre	Portugal		1973	52	0	0	0	0	1	43	240	7.5	92.5	289820	75	Hydroelectricity		3: Fair	-7.80098	39.5433
2810		Guadiloba	Guadiloba	Caceres	Spain		1971	54	0	0	0	0	1	32	534	2.8	20.4	496	351	Water supply		3: Fair	-6.29631	39.4881
2811		Cijara	Guadiana	Alia	Spain		1956	69	0	0	0	0	1	81	295	65.6	1505	38287	407	Irrigation		3: Fair	-5.01457	39.3771
2812		Torre de Abraham	Bullaque	Retuerta del Bullaque	Spain		1997	28	0	0	0	0	1	51	481	17.9	185	1702	657	Irrigation		2: Good	-4.25212	39.3694
2813		Forata	Magro	Yatova	Spain		1969	56	0	0	0	0	1	68	225	2.3	37.5	2018	367	Irrigation		2: Good	-0.865245	39.3439
2815		El Naranjero	Jucar	Cortes de Palla	Spain		1989	36	0	0	0	0	1	84	191	1.3	29	32740	254	Hydroelectricity		3: Fair	-0.852134	39.2763
2816		Ruecas	Ruecas	Logrosan	Spain		1996	29	0	0	0	0	1	43	800	4.3	43.8	636	382	Irrigation		3: Fair	-5.49364	39.2689
2817		Cortes de Pallas	Jucar	Cortes de Palla	Spain		1989	36	0	0	0	0	1	112	312	6.8	116	32588	338	Hydroelectricity		2: Good	-0.91875	39.2595
2818		Embarcaderos	Jucar	Cofrentes	Spain		1952	73	0	0	0	0	1	32	65	2.5	11	32266	365	Hydroelectricity		3: Fair	-1.03667	39.2411
2819		La Muela	Offstream Jucar		Spain		1988	37	0	0	0	0	1	-99	-99	-99	20	1	821			3: Fair	-0.92648	39.2385
2820		Sierra Brava	Pizarroso		Spain		1996	29	0	0	0	0	1	-99	-99	-99	232	842	312			3: Fair	-5.64479	39.1948
2821		Villar del Rey	Zapaton	Villar del Rey	Spain		1987	38	0	0	0	0	1	50	205	17.8	131.3	3962	258	Irrigation		3: Fair	-6.86562	39.153
2822	Garcia de Sola	Garcia de Sola	Guadiana	Talarrubias	Spain		1962	63	0	0	0	0	1	65	245	35.5	554	44380	351	Irrigation		2: Good	-5.18586	39.1454
2823		Tous	Jucar	Tous	Spain		1994	31	0	0	0	0	1	136	1025	9.8	340.4	34819	90	Irrigation		3: Fair	-0.656286	39.1355
2824		Gasset	Becea	Fernancaballero	Spain		1909	116	1	0	0	0	0	15	178	7.4	41.7	252	624	Irrigation		3: Fair	-3.93812	39.1313
2825		El Vicario	Guadiana	Ciudad Real	Spain		1973	52	0	0	0	0	1	22	173	13.5	31.4	18105	593	Irrigation		3: Fair	-3.99271	39.0603
2826		Penarroya	Guadiana	Argamasilla de Alba	Spain		1959	66	0	0	0	0	1	50	250	4.1	47.8	1629	735	Irrigation		3: Fair	-3.00549	39.0599
2827		Montargil	Sor	Abrantes	Portugal		1958	67	0	0	0	0	1	48	427	16.5	164.3	9223	74	Irrigation		3: Fair	-8.1728	39.0562
2828		Maranhao	Seda	Portalegre	Portugal		1957	68	0	0	0	0	1	55	204	19.6	205.4	16658	144	Irrigation		3: Fair	-7.97555	39.0193
2829		Caia	Caia	Elvas	Portugal		1967	58	0	0	0	0	1	52	460	19.7	203	3305	202	Irrigation		3: Fair	-7.14571	38.9998
2830		Orellana	Guadiana	Orellana la Vieja	Spain		1961	64	0	0	0	0	1	63	737	55.6	800	45873	282	Irrigation		3: Fair	-5.53799	38.9871
2831	Embalse de Bellus	Bellus	Albaida	Bellus	Spain		1995	30	0	0	0	0	1	46	724	8	69.2	1564	139	Other		2: Good	-0.477083	38.9384
2832		Zujar Saddle Dam	Zujar	Castuera	Spain		1964	61	0	0	0	0	1	61	350	15.9	309	22872	316	Irrigation		3: Fair	-5.47702	38.9189
2833		La Serena	Zujar	Castuera	Spain		1989	36	0	0	0	0	1	88	580	139.5	3231.8	22155	340	Irrigation		3: Fair	-5.41042	38.9104
2834		Beniarres	Serpis	Beniarres	Spain		1970	55	0	0	0	0	1	53	395	2.6	29.5	1643	311	Irrigation		3: Fair	-0.35625	38.8135
2835		Alange	Matachel	Alange	Spain		1992	33	0	0	0	0	1	67	720	50.4	851.7	7695	265	Irrigation		3: Fair	-6.26879	38.7851
2836		Vega de Jabalon	Jabalon	Calzada de Calatrava	Spain		1992	33	0	0	0	0	1	25	535	6.5	33.4	2152	634	Water supply		3: Fair	-3.7878	38.7622
2837		Divor	Divor	Evora	Portugal		1965	60	0	0	0	0	1	25	636	2.6	11.9	332	251	Irrigation		2: Good	-7.9257	38.7001
2838		Marisanchez	Jabalon	Valdepenas	Spain		1991	34	0	0	0	0	1	30	698	6.9	42.8	813	761	Irrigation		3: Fair	-3.27335	38.6939
2839		Guadalest	Guadalest	Guadalest	Spain		1964	61	0	0	0	0	1	77	285	0.7	13.4	244	341	Irrigation		3: Fair	-0.194298	38.6819
2840		La Fresneda	Fresneda	Viso del Marqu	Spain		1988	37	0	0	0	0	1	39	193	2.4	13.2	155	718	Water supply		2: Good	-3.62708	38.5572
2841		Vigia	Vale de Vasco	Evora	Portugal		1981	44	0	0	0	0	1	30	300	2.6	16.7	759	219	Irrigation		3: Fair	-7.6063	38.5406
2842		Amadorio	Amadorio	Villajoyosa	Spain		1960	65	0	0	0	0	1	68	318	1	15.8	714	96	Irrigation		3: Fair	-0.265281	38.5357
2843		Los Molinos de Matachel	Matachel	Hornachos	Spain		1983	42	0	0	0	0	1	35	305	5.2	33.7	3777	347	Water supply		3: Fair	-6.12303	38.5311
2845		Monte Novo	Degebe	Evora	Portugal		1982	43	0	0	0	0	1	30	160	2.8	15.3	2125	196	Irrigation		3: Fair	-7.71354	38.5145
2846		El Talave	Mundo	Lietor	Spain		1918	107	1	0	0	0	0	46	156	2.7	33.3	1755	500	Irrigation		2: Good	-1.86875	38.5063
2847	Pego do Altar	Pego do Altar	Santa Catarina	Setubal	Portugal		1949	76	0	0	0	1	0	63	192	8.8	94	5088	42	Irrigation		2: Good	-8.39199	38.4197
2849		El Cenajo	Segura	Hellin	Spain		1960	65	0	0	0	0	1	102	201	17.3	436.4	8484	408	Irrigation		3: Fair	-1.77777	38.3646
2850		Guadalmena	Guadalmena	Chiclana de Segura de la Sierra	Spain		1969	56	0	0	0	0	1	96	348	12.5	346	4014	587	Irrigation		3: Fair	-2.91375	38.3646
2851		Camarillas	Mundo	Hellin	Spain		1960	65	0	0	0	0	1	49	25	3.2	35.8	3873	419	Hydroelectricity		3: Fair	-1.64753	38.3414
2852		Alvito	Odivelas	Beja	Portugal		1977	48	0	0	0	0	1	49	1105	14.8	132.5	1157	195	Irrigation		3: Fair	-7.91028	38.2814
2853		Sierra Boyera	Guadiato	Belmez	Spain		1973	52	0	0	0	0	1	33	510	5.3	40.9	1163	495	Recreation		3: Fair	-5.22379	38.2602
2854		Vale do Gaio	Xarrama	Beja	Portugal		1949	76	0	0	0	1	0	51	368	5.5	63	2953	36	Irrigation		3: Fair	-8.2924	38.2493
2855		Jandula	Jandula	Andujar	Spain		1932	93	0	0	1	0	0	90	240	13.5	322	3957	329	Hydroelectricity		3: Fair	-3.97291	38.2271
2856		Alfonso 13	Quipar	Calasparra	Spain		1916	109	1	0	0	0	0	47	87	2.2	21.6	989	337	Hydroelectricity		3: Fair	-1.59929	38.2214
2857		Alqueva	Guadiana	Moura	Portugal	Spain	2002	23	0	0	0	0	0	96	458	250	4150	144373	79	Hydroelectricity		2: Good	-7.49479	38.1953
2858		Taibilla	Taibilla	Nerpio	Spain		1973	52	0	0	0	0	1	39	293	0.8	9.1	942	944	Water supply		3: Fair	-2.26022	38.1896
2859		Odivelas	Odivelas	Beja	Portugal		1972	53	0	0	0	0	1	55	544	9.7	96	2384	99	Irrigation		3: Fair	-8.11418	38.1863
2860		La Fernandina	Guarrizas	Vilches	Spain		1991	34	0	0	0	0	1	101	462	12.3	245	1299	435	Water supply		2: Good	-3.5696	38.1818
2861		Tranco de Beas	Guadalquivir	Villanueva del Arzobispo	Spain		1945	80	0	0	0	1	0	93	290	18	500	2296	621	Irrigation		3: Fair	-2.79479	38.1726
2862		Argos	Argos	Cehegin	Spain		1970	55	0	0	0	0	1	31	316	1.3	11.2	772	411	Hydroelectricity		3: Fair	-1.73646	38.1695
2863		Encinarejo	Jandula	Andujar	Spain		1932	93	0	0	1	0	0	33	170	1.5	15	4311	264	Irrigation		3: Fair	-3.99255	38.1653
2864		Guadalen	Guadalen	Arquillos	Spain		1954	71	0	0	0	0	1	59	283	13.5	163	3512	341	Hydroelectricity		3: Fair	-3.47708	38.1646
2865		Rumblar	Rumblar	Barios de la Encina	Spain		1941	84	0	0	0	1	0	68	220	6.6	126	813	312	Irrigation		3: Fair	-3.80472	38.1619
2866		Santomera Saddle Dam	Salada	Santomera	Spain		1965	60	0	0	0	0	1	52	206	2.6	25.5	118	82	Irrigation		3: Fair	-1.08963	38.1021
2867		Puente Nuevo	Guadiato	Villaviciosa de Cordoba	Spain		1972	53	0	0	0	0	1	55	232	20.5	286.8	2664	478	Water supply		3: Fair	-4.92487	38.0872
2868		Giribaile	Guadalimar	Ibros	Spain		1996	29	0	0	0	0	1	89	611	24.9	475	11058	325	Hydroelectricity		2: Good	-3.50933	38.0889
2869		Yeguas	Yeguas	Montoro	Spain		1989	36	0	0	0	0	1	87	668	9.5	228	1629	228	Irrigation		3: Fair	-4.2479	38.0687
2870		Guadalmellato	Guadalmellato	Adamuz	Spain		1928	97	0	1	0	0	0	61	396	7.2	147.4	2908	195	Irrigation		3: Fair	-4.67187	38.0438
2871		La Pedrera	Alcoriza	Orihuela	Spain		1980	45	0	0	0	0	1	65	716	12.7	246.1	40	100	Water supply		3: Fair	-0.869792	38.03
2872		El Pintado	Viar	Cazalla de la Sierra	Spain		1948	77	0	0	0	1	0	86	356	10.5	202	4728	329	Irrigation		3: Fair	-5.95309	37.986
2873		San Rafael de Navallana	Guadalmellato	Cordoba	Spain		1991	34	0	0	0	0	1	64	364	9.9	157	3132	152	Irrigation		3: Fair	-4.62611	37.9562
2874		Roxo	Roxo	Beja	Portugal		1968	57	0	0	0	0	1	49	847	13.8	96.3	2174	128	Irrigation		3: Fair	-8.08014	37.9312
2875		Aracena	Huelva	Puerto Moral	Spain		1969	56	0	0	0	0	1	60	612	8.4	129	3402	308	Hydroelectricity		3: Fair	-6.45032	37.9081
2876		Bembezar	Bembezar	Hornachuelos	Spain		1963	62	0	0	0	0	1	99	277	13.8	347	5160	151	Hydroelectricity		3: Fair	-5.20903	37.9036
2877		Morgavel	Morgavel	Setubal	Portugal		1980	45	0	0	0	0	1	46	2700	3.4	32.5	271	56	Water supply		3: Fair	-8.76286	37.902
2879		San Clemente	Guardal	Huescar	Spain		1990	35	0	0	0	0	1	92	580	6.2	120	471	1025	Irrigation		3: Fair	-2.64762	37.8608
2880		Retortillo	Retortillo	Hornachuelos	Spain		1970	55	0	0	0	0	1	53	156	6.3	73.2	830	182	Irrigation		3: Fair	-5.34896	37.8442
2881		Campilhas	Campilhas	Beja	Portugal		1954	71	0	0	0	0	1	35	711	3.3	27.2	768	103	Irrigation		3: Fair	-8.62016	37.8438
2883		Valdeinfierno	Luchena	Lorca	Spain		1806	219	1	0	0	0	0	49	165	2.2	14.2	383	691	Irrigation		2: Good	-1.96581	37.8065
2884		El Portillo	Castril	Castril	Spain		1999	26	0	0	0	0	1	83	327	1.4	33.5	368	860	Irrigation		3: Fair	-2.78677	37.8038
2885		Zufre	Rivera de Huelva	Zufre	Spain		1987	38	0	0	0	0	1	69	495	9.4	168	6578	250	Water supply		3: Fair	-6.28236	37.8005
2886		Huesna	Huesna	Constantina	Spain		1990	35	0	0	0	0	1	73	278	7.4	134.6	1247	245	Hydroelectricity		2: Good	-5.68427	37.77
2887		La Bolera	Guadaletin	Pozo Alcon	Spain		1967	58	0	0	0	0	1	48	108	2.6	53	491	957	Recreation		3: Fair	-2.90104	37.7656
2888		Jose Toran	Guadalbarcar	Lora del Rio	Spain		1992	33	0	0	0	0	1	77	362	6.4	101.2	595	136	Water supply		3: Fair	-5.48576	37.7523
2890		Monte da Rocha	Sado	Ourique	Portugal		1972	53	0	0	0	0	1	55	1600	11	104.5	1874	130	Irrigation		3: Fair	-8.28542	37.7263
2891		Cala	Cala	El Ronquillo	Spain		1927	98	0	1	0	0	0	53	346	4.9	58.8	3280	261	Hydroelectricity		3: Fair	-6.09038	37.718
2892		Sotiel	Olivargas	Almonaster la Real	Spain		1982	43	0	0	0	0	1	45	191	2.5	28.5	1772	165	Water supply		2: Good	-6.80563	37.7137
2893		La Manilla	Huelva	El Ronquillo	Spain		1956	69	0	0	0	0	1	62	245	3.5	56.4	7690	167	Irrigation		3: Fair	-6.18661	37.6687
2894	Vadomojon	Vadomojon	Guadajoz	Alcaudete	Spain		1997	28	0	0	0	0	1	75	427	7.8	165	3440	335	Irrigation		2: Good	-4.22586	37.6383
2895		Chanza	Chanza	El Granado	Spain	Portugal	1989	36	0	0	0	0	1	85	338	22.2	386	15403	59			3: Fair	-7.51886	37.5598
2896		Negratin	Guadiana Menor	Freila	Spain		1984	41	0	0	0	0	1	75	439	22	546	7016	596	Irrigation		3: Fair	-2.95429	37.561
2897		Agrio	Agrio	Aznalcollar	Spain		1977	48	0	0	0	0	1	45	232	2.8	40	1405	99	Water supply		3: Fair	-6.28437	37.5354
2898		Santa Clara	Mira	Odemira	Portugal		1968	57	0	0	0	0	1	86	428	19.9	485	4740	127	Irrigation		3: Fair	-8.43958	37.5152
2899		El Sancho	Meca	Gibraleon	Spain		1962	63	0	0	0	0	1	50	224	4.3	54.7	2261	42	Water supply		3: Fair	-6.98231	37.4621
2900		Piedras	Piedras	Cartaya	Spain		1968	57	0	0	0	0	1	40	620	8	79	1347	72	Irrigation		3: Fair	-7.26146	37.3694
2901	Cuevas de Almanzora	Cuevas de Almanzora	Almanzora	Cuevas de Almanzora	Spain		1986	39	0	0	0	0	1	118	669	5.7	190.7	1553	149	Irrigation		2: Good	-1.89896	37.3287
2902		Francisco Abellan	Fardes	La Peza Cortes	Spain		1998	27	0	0	0	0	1	90	244	2.3	58.7	542	977	Irrigation		3: Fair	-3.25771	37.3116
2903		Beliche	Beliche		Portugal		1986	39	0	0	0	0	1	54	527	2.9	48	731	50			3: Fair	-7.51172	37.2771
2904		Iznajar	Genil	Rute	Spain		1969	56	0	0	0	0	1	122	407	24.7	980	12556	396	Irrigation		3: Fair	-4.38431	37.2773
2905		Funcho	Arade	Silves	Portugal		1993	32	0	0	0	0	1	49	165	3.6	43.4	3114	114	Irrigation		3: Fair	-8.38267	37.2656
2907		Bravura	Odeaxere	Lagos	Portugal		1958	67	0	0	0	0	1	41	150	2.9	34.8	885	84	Irrigation		3: Fair	-8.69919	37.2033
2908		Canales	Genil	Guejar Sierra	Spain		1988	37	0	0	0	0	1	158	340	1.6	71	596	945	Irrigation		3: Fair	-3.47708	37.1594
2909		Puebla de Cazalla	Corbones	La Puebla de Cazalla	Spain		1994	31	0	0	0	0	1	71	220	3.3	73.7	1535	244	Irrigation		2: Good	-5.2425	37.1294
2910		Torre del Aguila	Salado de Moron	Utrera	Spain		1947	78	0	0	0	1	0	42	290	9.9	66	1909	54	Irrigation		3: Fair	-5.75465	37.0424
2911		Los Bermejales	Cacin	Arenas del Rey	Spain		1958	67	0	0	0	0	1	67	408	5.6	103	1533	821	Water supply		3: Fair	-3.89529	36.9962
2912	Guadalteba	Guadalteba	Guadalteba	Campillos	Spain		1972	53	0	0	0	0	1	84	789	8	150.1	7256	356	Irrigation	Guadalhorce and Guadalteba dams and reservoirs are directly next to each other	2: Good	-4.80305	36.943
2913	Guadalhorce	Guadalhorce	Guadalhorce	Campillos	Spain		1973	52	0	0	0	0	1	75	204	7.6	135.4	7256	356	Irrigation	Guadalhorce and Guadalteba dams and reservoirs are directly next to each other	2: Good	-4.80064	36.9449
2914	Conde de Guadalhorce	Conde de Guadalhorce	Ardales	Ardales	Spain		1921	104	1	0	0	0	0	74	160	5.5	74.1	1612	341	Hydroelectricity		2: Good	-4.80355	36.9311
2915		Beznar	Izbor	El Pinar	Spain		1986	39	0	0	0	0	1	134	408	1.7	56.5	1852	450	Irrigation		2: Good	-3.54018	36.9159
2916		Beninar	Grande de Adra	Beninar	Spain		1983	42	0	0	0	0	1	87	380	2.4	70	2696	344	Irrigation		3: Fair	-3.02576	36.8781
2917		La Vinuela	Guaro	Vinuela	Spain		1986	39	0	0	0	0	1	95	460	5.7	170	644	229	Irrigation		3: Fair	-4.16388	36.8621
2918		Rules	Guadalfeo	Velez de Benau	Spain		2003	22	0	0	0	0	0	130	620	3	117.1	7332	186	Irrigation		3: Fair	-3.49623	36.8613
2919		Zahara	Guadalete	Zahara	Spain		1992	33	0	0	0	0	1	82	420	7.5	223	809	330	Irrigation		3: Fair	-5.38886	36.8546
2920		Bornos	Guadalete	Bornos	Spain		1961	64	0	0	0	0	1	52	164	20.8	204	7474	110	Hydroelectricity		3: Fair	-5.75923	36.7938
2921		Guadalcacin 2	Majaceite	Jerez de la Frontera	Spain		1995	30	0	0	0	0	1	78	260	36.7	800	4601	98	Irrigation	Guadalcacin (also called 'Embebida') is an older dam; alternative dam height: 82 m	3: Fair	-5.78376	36.6678
2922		Los Hurones	Majaceite	Algar	Spain		1964	61	0	0	0	0	1	73	405	9	135	2244	203	Irrigation		3: Fair	-5.56292	36.6621
2923		La Concepcion	Verde	Marbella	Spain		1971	54	0	0	0	0	1	90	253	2	61	1000	59	Water supply		3: Fair	-4.96151	36.5365
2924		Barbate	Barbate	Alcala de los Gazules	Spain		1992	33	0	0	0	0	1	30	1352	-99	231	2785	28	Irrigation		3: Fair	-5.73953	36.3771
2925		Guadarranque	Guadarranque	Castellar de la Frontera	Spain		1965	60	0	0	0	0	1	71	235	4.3	87	1338	67	Irrigation		3: Fair	-5.46513	36.3103
2926		Celemin	Celemin	Medina Sidonia	Spain		1972	53	0	0	0	0	1	34	430	4.7	43	777	32	Irrigation		3: Fair	-5.77401	36.3025
2927		Charco Redondo	Palmones	Los Barrios	Spain		1983	42	0	0	0	0	1	72	311	4.6	81.5	899	62	Water supply		3: Fair	-5.54493	36.2332
3051		Heggmovatn	Heggmoelv	Bodo	Norway		1974	51	0	0	0	0	1	22	110	9.4	97	3923	110	Hydroelectricity		3: Fair	14.8862	67.3622
3052		Storglomvatn	Fykanaga	Bodo	Norway		1997	28	0	0	0	0	1	125	820	46.7	3468	19708	518	Hydroelectricity		3: Fair	14.1406	66.7716
3053		Kalvatn	Plura	Mo i Rana	Norway		1967	58	0	0	0	0	1	49	390	2.7	687.2	11138	571	Hydroelectricity		3: Fair	14.9161	66.2592
3054		Akersvatn	Dalselv	Mo i Rana	Norway		1968	57	0	0	0	0	1	53	485	-99	1244.7	6613	514	Hydroelectricity		3: Fair	14.5054	66.1778
3055		Gressvatn	Bjerka	Mo i Rana	Norway		1969	56	0	0	0	0	1	23	560	22.6	227	5219	596	Hydroelectricity		3: Fair	14.5448	66.0923
3056		Bleikvass Dam	Bleikvasselva		Norway		1999	26	0	0	0	0	1	-99	-99	-99	90	5006	400			3: Fair	13.8781	65.9365
3057		Hundalvatn	Hundala		Norway		1963	62	0	0	0	0	1	-99	-99	-99	116	14016	185			3: Fair	12.9073	65.8564
3058		Abelvattnet	Gejman	Storuman	Sweden		1968	57	0	0	0	0	1	26	-99	-99	400	9403	652	Hydroelectricity		3: Fair	14.9771	65.5435
3059		Ovre Kalvvatn Hoveddam	Abjora	Trondheim	Norway		1979	46	0	0	0	0	1	70	350	6.4	158	3996	502	Hydroelectricity		3: Fair	12.9823	65.1317
3060		Namsvatn Hoveddam	Namsen	Namsos	Norway		1951	74	0	0	0	0	1	20	230	-99	458	26801	455	Hydroelectricity		3: Fair	13.5366	65.0089
3061		Borgadammen	Fjallsjealven	Vilhelmina	Sweden		1952	73	0	0	0	0	1	27	-99	-99	249	14191	496	Hydroelectricity		3: Fair	14.9957	64.8249
3062	Stor Blasjon	Blasjon	Angerman		Sweden		1969	56	0	0	0	0	1	-99	-99	-99	100	25783	441			3: Fair	14.1954	64.7077
3063	Jormvattnet	Jormsjon	Angerman		Sweden		1969	56	0	0	0	0	1	-99	-99	-99	100	36866	369			3: Fair	14.119	64.5665
3065		Ytre Bangsjo Hoveddam	Bogna	Namsos	Norway		1969	56	0	0	0	0	1	16	-99	-99	150	4132	322			3: Fair	11.9038	64.2793
3066		Mjolkvattnet	Langan	Ostersund	Sweden		1963	62	0	0	0	0	1	-99	-99	-99	143	6062	569	Hydroelectricity		3: Fair	13.3701	63.8621
3067		Ovre Oldsjon	Ovre Oldan	Ostersund	Sweden		1975	50	0	0	0	0	1	-99	-99	-99	125	2608	615	Hydroelectricity		3: Fair	13.5367	63.7537
3068	Torrojen	Torron	Indalsalven	Ostersund	Sweden		1936	89	0	0	1	0	0	18	111	106	1180	38132	419	Hydroelectricity		3: Fair	13.0669	63.7723
3070	Kallsjon	Kallsjon	Indalsalven		Sweden		1974	51	0	0	0	0	1	-99	-99	-99	450	79905	366			3: Fair	13.3679	63.4054
3071	Storsjon	Jarpstrommens	Indalsalven	Ostersund	Sweden		1944	81	0	0	0	1	0	-99	-99	-99	505	228631	288	Hydroelectricity	Lake Storsjon is a natural lake; regulated by dam	3: Fair	14.4669	63.3044
3072		Hackren	Storbodstrommen	Ostersund	Sweden		1966	59	0	0	0	0	1	-99	-99	-99	700	20770	461	Hydroelectricity		3: Fair	13.6217	63.1906
3073	Nesjoen	Nesjo Hoveddam	Nea	Trondheim	Norway		1970	55	0	0	0	0	1	45	1040	65.9	625	16719	723	Hydroelectricity	The northern part of the Nesjoen reservoir was formerly a natural lake called Esandsjoen	3: Fair	11.832	62.997
3074		Follsjo	Folla	Trondheim	Norway		1969	56	0	0	0	0	1	76	600	6.8	180	10613	460	Hydroelectricity		3: Fair	9.1327	62.9877
3075		Grasjo	Folla	Trondheim	Norway		1969	56	0	0	0	0	1	69	660	10.5	206	8951	461	Hydroelectricity		3: Fair	9.13125	62.934
3076		Sylsjo	Nea	Trondheim	Norway	Sweden	1951	74	0	0	0	0	1	23	320	-99	185	5018	828	Hydroelectricity		3: Fair	12.1521	62.9296
3077		Nerskogen Hoveddam			Norway		1982	43	0	0	0	0	1	53	1200	-99	144	5335	648	Hydroelectricity		3: Fair	9.70312	62.8258
3078		Flasjon	Ljungan	Asarna	Sweden		1974	51	0	0	0	0	1	55	1140	-99	400	19834	474	Hydroelectricity		3: Fair	13.7135	62.7607
3080		Innerdalen Hoveddam			Norway		1981	44	0	0	0	0	1	53	-99	5.9	157	799	836			3: Fair	10.1344	62.5495
3081		Grundsjoarna	Mittan	Sveg	Sweden		1972	53	0	0	0	0	1	-99	-99	-99	240	7018	645	Hydroelectricity		3: Fair	13.105	62.5229
3082		Osbudammen	Littledalselv	Molde	Norway		1958	67	0	0	0	0	1	32	890	-99	140.6	5741	817	Hydroelectricity		3: Fair	8.48151	62.5087
3083		Lossen	Ljusnan	Tannas	Sweden		1962	63	0	0	0	0	1	28	1631	-99	500	16971	541	Hydroelectricity		3: Fair	12.9595	62.4038
3084		Aursjo	Aura	Molde	Norway		1956	69	0	0	0	0	1	40	970	36.4	561	10772	833	Hydroelectricity		3: Fair	8.53958	62.3985
3085		Zakariasvatn	Rodal	Alesund	Norway		1969	56	0	0	0	0	1	90	145	-99	70	4027	441	Hydroelectricity		3: Fair	7.49083	62.202
3086		Sveg	Ljusnan	Sveg	Sweden		1975	50	0	0	0	0	1	44	-99	19	237	81738	356	Hydroelectricity		3: Fair	14.2808	62.0273
3087		Raudalsvatn	Otta	Otta	Norway		1952	73	0	0	0	0	1	40	92	7.4	139.4	5813	896	Hydroelectricity		3: Fair	7.77708	61.9097
3088		Styggevatn	Jostedalselv	Alesund	Norway		1990	35	0	0	0	0	1	60	884	-99	274	2317	1216	Hydroelectricity		3: Fair	7.44688	61.7704
3089		Storevatn Dam 1			Norway		1962	63	0	0	0	0	1	16	-99	-99	107	468	1361			3: Fair	7.93854	61.6076
3091		Trangslet	Osterdalalven	Mora	Sweden		1974	51	0	0	0	0	1	122	-99	-99	880	54930	432	Hydroelectricity		2: Good	13.7205	61.4079
3092	Dokkfloyvatnet	Dokkfloyvatn	Dokka		Norway		1989	36	0	0	0	0	1	81	-99	8.7	197	7476	696	Hydroelectricity		2: Good	9.973	61.0857
3093		Arsdalsvatn	Fordeelv	Bergen	Norway		1968	57	0	0	0	0	1	44	156	1.3	41.5	2333	465	Hydroelectricity		3: Fair	5.81992	61.0192
3094		Muravatn Hoveddam	Refsdalselv	Voss	Norway		1968	57	0	0	0	0	1	77	250	-99	78.8	1384	1049	Hydroelectricity		3: Fair	6.58686	60.9855
3096	Store Oljusjoen	Oljusjoen	Morkedola		Norway		1973	52	0	0	0	0	1	-99	-99	8.5	165	472	1342	Hydroelectricity		2: Good	8.07019	60.9722
3097		Holjes	Klaralven	Hagfors	Sweden		1961	64	0	0	0	0	1	-99	-99	-99	270	84253	307	Hydroelectricity		3: Fair	12.541	60.9528
3098		Stordalsvatn	Brydalselv	Bergen	Norway		1963	62	0	0	0	0	1	18	134	1.4	33.7	3276	485	Hydroelectricity		3: Fair	5.68695	60.9517
3100		Kvilesteinsvatn Hoveddam	Gravseta	Voss	Norway		1970	55	0	0	0	0	1	47	280	3.5	61	708	946	Hydroelectricity	Two dams for this reservoir	2: Good	6.31222	60.9128
3101		Skjerjevatn Hoveddam	Eksingedalselv		Norway		1984	41	0	0	0	0	1	-99	-99	-99	104.2	2143	1008			3: Fair	6.14235	60.8911
3102		Skjerjevatn Hoveddam	Haugsdalsvassdraget	Bergen	Norway		1990	35	0	0	0	0	1	25	150	-99	31.2	1065	879	Hydroelectricity		3: Fair	5.84207	60.8832
3103		Askjelldalsvatn	Eksingedalselv	Bergen	Norway		1975	50	0	0	0	0	1	34	370	2.8	64.4	6239	858	Hydroelectricity		3: Fair	6.17447	60.8758
3104		Viddalsvatn Fyllingsdam			Norway		1971	54	0	0	0	0	1	-99	-99	-99	204	1128	1007			3: Fair	7.21605	60.7677
3105		Godbotsvatn	Haugsdalselv	Bergen	Norway		1957	68	0	0	0	0	1	24	280	1.3	21.9	7188	513	Hydroelectricity		3: Fair	5.6453	60.8538
3106	Gyrinosvatnet	Flavatn Dam	Lauvdola Flaavatn	Honefoss	Norway		1959	66	0	0	0	0	1	30	-99	16.4	205	3989	1105	Hydroelectricity		2: Good	8.38828	60.8349
3107	Kongshellervatnet	Nyhellervatn Hoveddam 1			Norway		1979	46	0	0	0	0	1	-99	-99	-99	448	2395	1419		Two dams for this reservoir	3: Fair	7.64479	60.8135
3108	Stolsvatnet	Stolsvatn	Urunda	Honefoss	Norway		2008	17	0	0	0	0	0	23	600	-99	219	7167	1089	Hydroelectricity	Original dam from 1947 was rebuilt in 2008	2: Good	8.00984	60.733
3109		Letten	Lettan	Hagfors	Sweden		1956	69	0	0	0	0	1	-99	-99	-99	160	1283	333	Hydroelectricity		3: Fair	12.6854	60.7312
3110		Strandevatn Fyllingsdam	Storani	Honefoss	Norway		1955	70	0	0	0	0	1	40	-99	24	619.8	7491	1057	Hydroelectricity		3: Fair	7.93385	60.6711
3111		Langavatn Hoveddam	Aust-Dola	Bergen	Norway		1981	44	0	0	0	0	1	57	318	-99	142.3	757	1138	Hydroelectricity	There might be a third dam: 24m high, 393m long	3: Fair	7.11875	60.5528
3112		Rembesdalsvatnet Hoveddam			Norway		1980	45	0	0	0	0	1	43	-99	1.3	27.6	1521	943			3: Fair	7.258	60.5279
3113	Holmavatnet	Svartevatn Hoveddam			Norway		1923	102	1	0	0	0	0	36	195	-99	70.2	2638	623			3: Fair	5.95783	60.4559
3114		Bjolsegrovatn Hoveddam	Bjolve	Bergen	Norway		1937	88	0	0	1	0	0	21	98	5.8	89	3181	872	Hydroelectricity		3: Fair	6.35938	60.4451
3115		Palsbufjord	Numedalslagen	Kongsberg	Norway		1946	79	0	0	0	1	0	20	-99	20	290	40868	726	Hydroelectricity		2: Good	8.73361	60.433
3116		Sysenvatnet	Leiro	Bergen	Norway		1979	46	0	0	0	0	1	81	-99	10.2	427	7211	890	Hydroelectricity		2: Good	7.37781	60.4077
3117	Mjosa	Mjosa	Vorma	Langset	Norway		1965	60	0	0	0	0	1	-99	-99	362	1300	276143	128		Norway's largest natural lake; dams built in 1858, 1911, 1947, and 1965 raised the lake level by approximately 3.6 meters; storage capacity estimated from added lake volume	3: Fair	11.2281	60.3989
3118		Tunhovd Fyllingsdam	Numedalslagen	Kongsberg	Norway		1966	59	0	0	0	0	1	37	320	25.3	352	41523	731	Hydroelectricity		2: Good	8.93115	60.3196
3119		Dravladalsvatn Hoveddam			Norway		1972	53	0	0	0	0	1	29	-99	1.4	23	1774	856			3: Fair	6.4247	60.2497
3120		Sonstevatn Fyllingsdam	Olmos		Norway		1966	59	0	0	0	0	1	-99	-99	-99	220	2880	1040			3: Fair	8.58542	60.2307
3121		Juklavatn Hoveddam			Norway		1973	52	0	0	0	0	1	23	-99	3.6	145	1074	1007			3: Fair	6.34981	60.204
3122		Ringedalsvatn	Tysso	Bergen	Norway		1918	107	1	0	0	0	0	34	520	7	202	17306	427	Hydroelectricity		3: Fair	6.63438	60.1265
3124		Langavatn Dam 1	Langevatnelv	Bergen	Norway		1967	58	0	0	0	0	1	30	280	6.2	165	1262	1174	Hydroelectricity		3: Fair	6.76458	60.0893
3125		Marvatn			Norway		1917	108	1	0	0	0	0	-99	-99	-99	321	4610	1116			3: Fair	8.28396	60.0906
3126		Kalhovd	Mar	Rjukan	Norway		1946	79	0	0	0	1	0	15	-99	20	256.4	10947	1102	Hydroelectricity		2: Good	8.37135	60.067
3127		Mosevatn Hoveddam	Mosevasselv	Bergen	Norway		1965	60	0	0	0	0	1	34	125	-99	25.4	1847	865	Hydroelectricity		3: Fair	6.2118	59.9305
3128		Midtbotnvatn Hoveddam			Norway		1958	67	0	0	0	0	1	50	-99	1.6	65	3839	760			2: Good	6.18958	59.9146
3129		Bladalsvatn Hoveddam	Blaelv	Bergen	Norway		1975	50	0	0	0	0	1	52	460	2.9	88	6934	709			3: Fair	6.16012	59.9067
3130		Elvaga	Elvaga		Norway		1964	61	0	0	0	0	1	-99	-99	-99	13.1	336	219			3: Fair	10.9127	59.9022
3131		Valldalsvatn			Norway		1965	60	0	0	0	0	1	93	-99	6.8	290	10652	724			3: Fair	6.89366	59.8772
3132		Fjellhaugvatn	Blaelv	Bergen	Norway		1959	66	0	0	0	0	1	32	70	1	22.4	12534	379	Hydroelectricity		3: Fair	6.04451	59.8679
3135		Mosvatn	Mana		Norway		1908	117	1	0	0	0	0	-99	-99	-99	1064	41617	919			3: Fair	8.31744	59.8221
3136		Songa Hoveddam	Songa	Rjukan	Norway		1962	63	0	0	0	0	1	42	1650	29.9	638.6	12877	963	Hydroelectricity		3: Fair	7.57188	59.8199
3137		Bordalsvatn Hoveddam	Bora	Rjukan	Norway		1960	65	0	0	0	0	1	42	300	6.5	154.4	6760	897	Hydroelectricity		3: Fair	7.40443	59.8117
3138		Kaldevatn Hoveddam	Kaldevassdraget	Stavanger	Norway		1974	51	0	0	0	0	1	26	205	1.9	19	682	1207	Hydroelectricity		2: Good	7.0101	59.809
3139		Kjelavatn Hoveddam	Kjela	Rjukan	Norway		1962	63	0	0	0	0	1	16	-99	5.4	82	6019	930			3: Fair	7.24374	59.79
3140		Bitdalsvatn			Norway		1970	55	0	0	0	0	1	-99	-99	-99	100.3	2224	953			3: Fair	7.97117	59.7812
3141		Sandvatn Dam	Storelv	Stavanger	Norway		1971	54	0	0	0	0	1	20	-99	3.2	20	2414	1008	Hydroelectricity		3: Fair	6.66458	59.7732
3142		Venemo	Bora		Norway		1963	62	0	0	0	0	1	-99	-99	-99	28	8798	695			3: Fair	7.5644	59.7573
3143		Svartavatn Dam	Storelv	Stavanger	Norway		1927	98	0	1	0	0	0	18	-99	-99	22	3845	827	Hydroelectricity		3: Fair	6.63155	59.7323
3144		Forsvatn Hoveddam	Kjela	Rjukan	Norway		1979	46	0	0	0	0	1	55	240	3.2	110.2	2034	857	Hydroelectricity		3: Fair	7.42517	59.7303
3145		Finnabuvatn Dam	Stolsana	Stavanger	Norway		1974	51	0	0	0	0	1	19	580	1.2	25.7	2225	893	Hydroelectricity		3: Fair	6.8738	59.7198
3146		Slettedalen Dam	Slettedalselv	Stavanger	Norway		1960	65	0	0	0	0	1	72	170	3.1	87	7560	489	Hydroelectricity		2: Good	6.49277	59.7116
3147		Vasstolvatn	Stolsano	Haugesund	Norway		1967	58	0	0	0	0	1	25	430	0.8	11	3136	723	Hydroelectricity		3: Fair	6.83725	59.6998
3148		Sandvatn Dam 1	Sandvassano		Norway		1967	58	0	0	0	0	1	-99	-99	-99	57	3824	923			3: Fair	7.05807	59.6498
3149		Vamarvatn			Norway		1963	62	0	0	0	0	1	-99	-99	-99	26.2	575	683			3: Fair	7.89062	59.6489
3151		Kykkelsrud Inntaksdam	Glomma		Norway		1964	61	0	0	0	0	1	-99	-99	-99	15	635262	85			3: Fair	11.0983	59.5819
3153	Fryken	Frykfors Fryken	Norsalven		Sweden		2010	15	0	0	0	0	0	-99	-99	-99	182	44380	66	Hydroelectricity	Fryken is a chain of three lakes; Lower (Nedre), Middle (Mellan) and Upper (Ovre) Fryken; polygon represents Lower and Middle Fryken; dam was refurbished in 2010	3: Fair	13.3105	59.6147
3154		Vamma	Glomma		Norway		1918	107	1	0	0	0	0	-99	-99	-99	15	635742	60			3: Fair	11.1677	59.5382
3155		Byrte			Norway		1966	59	0	0	0	0	1	-99	-99	-99	75	2746	469			3: Fair	7.83635	59.4958
3156		Botnedalsvatn Hoveddam	Dalai		Norway		1968	57	0	0	0	0	1	-99	-99	-99	55	2350	726			3: Fair	7.78486	59.4906
3157		Vatnedalen Hoveddam	Otra	Kristiansand	Norway		1984	41	0	0	0	0	1	120	-99	14	930	10520	817	Hydroelectricity		3: Fair	7.36376	59.4605
3158		Urar	Uranari		Norway		1997	28	0	0	0	0	1	-99	-99	-99	275	2627	1211			3: Fair	7.18349	59.459
3159		Borsa Hoveddam	Nidelv		Norway		1951	74	0	0	0	0	1	-99	-99	-99	84	5104	772			3: Fair	7.82618	59.3809
3160	Blasjo	Forrevassdammen	Forreana	Haugesund	Norway		1986	39	0	0	0	0	1	-99	-99	-99	775	4749	1043	Hydroelectricity	There are several regulating dams for lake 'Blasjo' which is split into two polygons (see other record); used to be a natural lake; total volume 3105 mcm, total area 84 skm	3: Fair	6.74549	59.3746
3161		Bossvatn Hoveddam	Otra	Kristiansand	Norway		1976	49	0	0	0	0	1	32	570	5.5	236	18363	533	Hydroelectricity		3: Fair	7.2924	59.3453
3162	Blasjo	Storvatn	Oddeana	Haugesund	Norway		1987	38	0	0	0	0	1	90	1400	-99	2325	9453	1018	Hydroelectricity	There are several regulating dams for lake 'Blasjo' which is split into two polygons (see other record); used to be a natural lake; total volume 3105 mcm, total area 84 skm	3: Fair	6.94271	59.3035
3163		Oysa	Nidelv-Bondol		Norway		1972	53	0	0	0	0	1	-99	-99	-99	64.5	1582	675			3: Fair	7.81102	59.261
3164	Livatnet	Torsdalen			Norway		1963	62	0	0	0	0	1	-99	-99	-99	105.6	4310	671			3: Fair	7.75872	59.2039
3165		Nilsebuvatn	Storana	Stavanger	Norway		1968	57	0	0	0	0	1	22	300	2.5	30	9030	729	Hydroelectricity		3: Fair	6.61562	59.1656
3166	Napevatnet	Rudsvaten	Nitelv	Arendal	Norway		1970	55	0	0	0	0	1	25	-99	-99	217	2107	503	Hydroelectricity		3: Fair	8.33361	59.1659
3167		Svartevatn Dam	Sira	Stavanger	Norway		1976	49	0	0	0	0	1	130	420	32.6	1398	10932	882	Hydroelectricity		3: Fair	6.89792	59.1326
3168		Lyngsvatn Hoveddam	Lyngsana	Stavanger	Norway		1964	61	0	0	0	0	1	37	650	12.8	275	3315	666	Hydroelectricity		3: Fair	6.40752	59.1075
3169		Roskreppfjord Hoveddam	Kvina	Flekkefjord	Norway		1968	57	0	0	0	0	1	48	360	29.5	684	11384	917	Hydroelectricity		3: Fair	7.16463	59.0448
3170	Store Tjodanvatn	Akslaratjorn Sperredam	Tjodanvass Draget	Stavanger	Norway		1984	41	0	0	0	0	1	31	160	-99	56.5	832	944	Hydroelectricity	Three dams for this reservoir	3: Fair	6.64814	59.0168
3171	Valevatnet	Flatholmyra Dam	Sira		Norway		1970	55	0	0	0	0	1	-99	-99	-99	252.8	20867	657		Two dams for this reservoir; polygon too small?	3: Fair	6.89373	59.0058
3172		Florlivatn Dam	Florlielva		Norway		2000	25	0	0	0	0	1	-99	-99	-99	55	674	764			3: Fair	6.47372	58.9935
3173		Oyarvatn Hoveddam	Kvina	Flekkefjord	Norway		1981	44	0	0	0	0	1	15	15	8.1	67	17118	833	Hydroelectricity		3: Fair	7.12664	58.9737
3174	Skagern	Gullspang	Gullspangsalven	Mariestad	Sweden		1908	117	1	0	0	0	0	-99	-99	-99	320	56870	76	Hydroelectricity		3: Fair	14.1157	58.9763
3175	Toke	Dalsfoss	Toke		Norway		1958	67	0	0	0	0	1	-99	-99	30	150	25989	74		Lake is divided into Ovre Toke and Nedre Toke; hydropower station was refurbished in 1958	2: Good	9.30924	58.9677
3176		Nesvatn			Norway		1975	50	0	0	0	0	1	-99	-99	-99	150	6168	526			3: Fair	8.08857	58.9678
3177	Valevatn	Deg Hoveddam	Sira-Digea		Norway		1970	55	0	0	0	0	1	-99	-99	-99	351	8436	651			3: Fair	6.89637	58.9599
3179		Juvatn Hoveddam	Logna	Kristiansand	Norway		1959	66	0	0	0	0	1	46	232	-99	142	8983	501	Hydroelectricity		2: Good	7.54791	58.8028
3180		Nesjen Hoveddam	Kvina	Flekkefjord	Norway		1968	57	0	0	0	0	1	50	700	1	176	28751	706	Hydroelectricity		3: Fair	7.02708	58.7814
3181		Romsvatn Ytre Hoveddam	Bjerkheimsvass Draget		Norway		1978	47	0	0	0	0	1	-99	-99	-99	18.8	494	415			3: Fair	6.1078	58.7325
3182		Kulivatn	Finsa	Egersund	Norway		1966	59	0	0	0	0	1	22	315	2.2	32	1133	606	Hydroelectricity		3: Fair	6.62284	58.7272
3183		Stolsvatn	Austerboelv		Norway		1971	54	0	0	0	0	1	-99	-99	-99	60	959	298			3: Fair	6.08511	58.7188
3184		Nespervatn	Finsa	Egersund	Norway		1964	61	0	0	0	0	1	17	250	2	30	2591	420	Hydroelectricity		3: Fair	6.63646	58.6733
3185	Navatn	Navatn 1	Skjerka	Kristiansand	Norway		1941	84	0	0	0	1	0	25	190	6.7	106	9475	623	Hydroelectricity	There are a total of four different dams for this reservoir	3: Fair	7.30729	58.5821
3186	Skjerkavatn	Nedre Skjerkavatn	Skjerka		Norway		1934	91	0	0	1	0	0	-99	-99	-99	19	44053	317	Hydroelectricity	Water is transported from nearby Navatn reservoir via an underground tunnel to Skjerkavatn, and from here to a hydropower plant	3: Fair	7.39233	58.546
3187	Vanern	Vargon	Gotaalv	Sweden	Sweden		1934	91	0	0	1	0	0	20	-99	5500	9500	523118	50	Hydroelectricity		3: Fair	12.3686	58.369
3188		Covenham		Louth	United Kingdom		1970	55	0	0	0	0	1	15	915	0.9	10.9	402	2	Water supply		2: Good	0.027136	53.4475
3189		Alton Water	Holbrock Stream	Ipswich	United Kingdom		1976	49	0	0	0	0	1	25	450	1.6	9.1	205	15	Water supply		2: Good	1.14628	51.977
3190		Innerste	Innerste	Langelsheim	Germany		1966	59	0	0	0	0	1	46	750	1.5	20	1019	247	Flood control		2: Good	10.2966	51.9138
3191		Grane	Grane	Goslar	Germany		1969	56	0	0	0	0	1	67	600	2.2	46.4	236	302	Water supply		2: Good	10.3771	51.91
3192		Oker	Oker	Goslar	Germany		1956	69	0	0	0	0	1	73	260	2.3	47.4	866	430	Flood control		2: Good	10.4587	51.8504
3193		Abberton	Layer Brook	Colchester	United Kingdom		1938	87	0	0	1	0	0	15	731	4.9	25.7	318	16	Water supply		2: Good	0.889583	51.8385
3194		Sose	Sose	Osterode	Germany		1931	94	0	0	1	0	0	56	485	1.2	25.5	550	320	Flood control		3: Fair	10.3114	51.7396
3195		Rappbode	Rappbode	Wernigerode	Germany		1959	66	0	0	0	0	1	106	415	3.9	109.1	1150	406	Water supply		2: Good	10.893	51.7385
3196		Hanningfield	Sandon Brook	Chelmsford	United Kingdom		1958	67	0	0	0	0	1	18	2133	3.5	27.1	135	52	Water supply		3: Fair	0.51028	51.6638
3197		Spremberg	Spree	Spremberg	Germany		1965	60	0	0	0	0	1	20	3700	9.3	42.7	13256	91	Water supply		2: Good	14.3937	51.656
3198		Muldestausee	Mulde	Bitterfeld	Germany		1975	50	0	0	0	0	1	19	303	6	135.5	288	81	Flood control		3: Fair	12.3578	51.6559
3199		Oder	Oder	Bad Lauterberg	Germany		1934	91	0	0	1	0	0	62	310	1.4	30.6	642	396	Flood control		2: Good	10.5076	51.6472
3200	Moehnesee	Moehne	Moehne	Soest	Germany		1913	112	1	0	0	0	0	40	650	10.4	134.5	5895	203	Water supply	Built 1908 to 1913	1: Verified	8.05746	51.4881
3201		Kelbra	Helme	Sangerhausen	Germany		1968	57	0	0	0	0	1	13	4066	6	35.6	6356	152	Flood control		3: Fair	11.0089	51.4422
3202		Twiste	Twiste	Arolsen	Germany		1981	44	0	0	0	0	1	22	280	1.2	10.3	1847	203	Flood control		2: Good	9.06367	51.3835
3203		Diemel	Diemel	Niedermarsberg	Germany		1924	101	1	0	0	0	0	42	194	1.6	20.1	1278	380	Navigation		2: Good	8.72687	51.3764
3204		Sorpe	Sorpe	Sundern	Germany		1935	90	0	0	1	0	0	69	700	3.3	70	656	284	Flood control		2: Good	7.96875	51.3482
3205		Braakman	Braakman Kreek	Terneuzen	Netherlands		1952	73	0	0	0	0	1	20	2600	1.3	10	864	-1	Flood control		2: Good	3.76042	51.3342
3206		Henne	Henne	Meschede	Germany		1955	70	0	0	0	0	1	58	376	2.1	38.4	733	326	Hydroelectricity		2: Good	8.27194	51.3346
3207		Quitzdorf	Schwarzer Schops	Niesky	Germany		1972	53	0	0	0	0	1	12	1500	7.5	20.6	1119	154	Water supply		3: Fair	14.7536	51.2835
3208		Bautzen	Spree	Bautzen	Germany		1975	50	0	0	0	0	1	19	2080	5.6	44.6	2192	160	Water supply		2: Good	14.4687	51.2176
3209		Bough Beech	Trib. Eden	Edenbridge	United Kingdom		1982	43	0	0	0	0	1	24	1312	-99	10.4	136	55	Water supply		2: Good	0.135416	51.2071
3210		Wupper	Wupper	Huckeswagen	Germany		1986	39	0	0	0	0	1	40	320	2.3	25.9	2240	255	Flood control		3: Fair	7.30312	51.1973
3211		Verse	Verse	Ludenscheid	Germany		1952	73	0	0	0	0	1	62	320	1.7	32.8	298	377	Water supply		3: Fair	7.68438	51.1921
3212		Eder	Eder	Bad Wildungen	Germany		1914	111	1	0	0	0	0	41	399	11.7	202.4	15881	247	Navigation		3: Fair	9.05616	51.1853
3213		Straussfurt	Unstrut	Sommerda	Germany		1961	64	0	0	0	0	1	13	1930	9	19.2	13146	143	Flood control		3: Fair	10.9839	51.1526
3214		Bever	Bever	Wuppertal	Germany		1939	86	0	0	1	0	0	49	520	2	23.7	284	298	Flood control		2: Good	7.37284	51.1438
3215		Ennepe	Ennepe	Breckerfeld	Germany		1904	121	1	0	0	0	0	51	330	1	12.6	147	317	Water supply		2: Good	7.39511	51.1396
3216		Bigge	Bigge	Attendorn	Germany		1965	60	0	0	0	0	1	57	640	7.1	171.7	3664	322	Flood control		3: Fair	7.89105	51.1128
3217		Weirwood			United Kingdom		1954	71	0	0	0	0	1	13	-99	1.1	5.6	317	75	Water supply		2: Good	0.007292	51.0985
3218		Bewl Bridge	Bewl	Tunbridge Well	United Kingdom		1975	50	0	0	0	0	1	31	956	3.1	31.4	292	71	Water supply		2: Good	0.397746	51.0765
3219		Grosse Dhunn	Grosse Dhunn	Wermelskirch	Germany		1984	41	0	0	0	0	1	63	380	4.4	81	642	155	Water supply		3: Fair	7.18692	51.0677
3220		Agger	Agger	Gummersbach	Germany		1929	96	0	1	0	0	0	45	225	1.2	19.3	486	271	Hydroelectricity		2: Good	7.6326	51.0369
3221		Kriebstein	Zschopau	Hainichen	Germany		1930	95	0	1	0	0	0	28	230	1.3	11.7	16076	223	Flood control		2: Good	13.0103	51.0343
3222		Wiehl	Wiehl	Gummersbach	Germany		1973	52	0	0	0	0	1	53	360	2.1	31.5	523	271	Flood control		2: Good	7.66767	50.9367
3223		Malter	Rote Weisseritz	Dippoldiswalde	Germany		1913	112	1	0	0	0	0	36	193	0.8	16.4	882	335	Flood control		2: Good	13.6547	50.9256
3224		Obernhau	Obernaubach	Siegen	Germany		1972	53	0	0	0	0	1	60	300	0.9	14.9	152	350	Water supply		2: Good	8.14132	50.9169
3225		Klingenberg	Wilde Weisseritz	Dippoldiswalde	Germany		1914	111	1	0	0	0	0	40	310	1.2	16.4	774	396	Water supply		2: Good	13.5365	50.9054
3226		Lehnmuehle	Wilde Weisseritz	Dippoldiswalde	Germany		1931	94	0	0	1	0	0	51	521	1.4	21.9	511	522	Water supply		3: Fair	13.5938	50.8312
3227		Wahnbach	Wahnbach	Siegburg	Germany		1958	67	0	0	0	0	1	53	379	2.2	41.4	701	133	Water supply		2: Good	7.2865	50.8063
3228		Ohra	Ohra	Gotha	Germany		1967	58	0	0	0	0	1	59	260	0.8	17.5	252	540	Water supply		3: Fair	10.7215	50.7654
3229		Wehebach	Wehebach	Stolberg	Germany		1981	44	0	0	0	0	1	49	435	1.6	25.1	572	231	Water supply		2: Good	6.34101	50.7548
3230		Saidenbach	Saidenbach	Marienberg	Germany		1933	92	0	0	1	0	0	59	334	1.5	22.4	568	433	Water supply		2: Good	13.2205	50.7324
3231	Weida Reservoir	Weida	Weida	Zeulenroda	Germany		1956	69	0	0	0	0	1	33	167	0.9	9.7	954	325	Water supply		1: Verified	11.9885	50.707
3232		Flaje	Flajsky Potok	Litvinov	Czech Republic		1963	62	0	0	0	0	1	56	459	1.5	27.1	307	733	Flood control		2: Good	13.5854	50.6851
3233	Zeulenroda Reservoir	Zeulenroda	Weida	Zeulenroda	Germany		1975	50	0	0	0	0	1	35	307	2.3	30.4	818	356	Water supply		1: Verified	11.9762	50.6685
3234		Schwammenauel	Rur	Heimbach	Germany		1959	66	0	0	0	0	1	77	480	6.2	181.8	8120	278	Flood control		3: Fair	6.43949	50.6384
3235		Vesdre	La Vesdre	Eupen	Belgium		1949	76	0	0	0	1	0	66	410	1.3	25	978	329	Water supply		2: Good	6.09121	50.6175
3236		Hohenwarte	Saale	Saalfeld	Germany		1941	84	0	0	0	1	0	75	412	7.3	182	12841	305	Flood control		3: Fair	11.4945	50.6141
3237		Urft	Urft	Schleiden	Germany		1905	120	1	0	0	0	0	58	226	2.2	45.5	4216	312	Flood control		2: Good	6.4197	50.601
3238		Gilepppe	La Gileppe	Verviers	Belgium		1971	54	0	0	0	0	1	68	365	1.3	27	452	306	Water supply		2: Good	5.97604	50.5882
3239		Pohl	Trieb	Plauen	Germany		1964	61	0	0	0	0	1	59	312	3.9	61.9	1043	368	Water supply		3: Fair	12.1821	50.5503
3240		Schonbrunn	Schleuse	Suhl	Germany		1975	50	0	0	0	0	1	67	260	1	23.2	227	549	Water supply		3: Fair	10.8813	50.5447
3241		Eibenstock	Zwickauer Mulde	Aue	Germany		1982	43	0	0	0	0	1	66	308	3.7	74.3	1358	541	Water supply		3: Fair	12.5968	50.5304
3242		Bleiloch	Saale	Schleiz	Germany		1932	93	0	0	1	0	0	65	208	9.2	215	10261	412	Flood control		3: Fair	11.7145	50.5216
3243		Olef	Olef	Schleiden	Germany		1961	64	0	0	0	0	1	59	282	1.1	19.3	640	429	Water supply		2: Good	6.42134	50.4954
3244		Prisecnice	Prisecnicky Potok	Vejprty	Czech Republic		1975	50	0	0	0	0	1	58	470	3.6	55	319	733	Water supply		2: Good	13.134	50.4883
3245		Butgenbach	La Warche	Malmedy	Belgium		1932	93	0	0	1	0	0	28	227	1.2	11	926	546	Hydroelectricity		2: Good	6.21125	50.4343
3246		Pirk	Weisse Elster	Plauen	Germany		1938	87	0	0	1	0	0	24	250	1.5	10	2620	385	Water supply		2: Good	12.0993	50.4283
3247		Droda	Feilebach	Plauen	Germany		1972	53	0	0	0	0	1	52	375	2.4	17.6	374	435	Water supply		3: Fair	12.0573	50.3967
3248		Nechranice	Ohre	Chomutov	Czech Republic		1968	57	0	0	0	0	1	52	3280	1.3	287.6	24637	248	Flood control		3: Fair	13.4168	50.362
3249		MauthausI	Nurner Kodel	Kronach	Germany		1972	53	0	0	0	0	1	61	290	0.9	21	293	448	Water supply		3: Fair	11.4893	50.3275
3250	Lake Eau d'Heure	Eau d'Heure	Eau d'Heure	Charleroi	Belgium		1978	47	0	0	0	0	1	35	250	2.4	14.8	878	207	Navigation	This reservoir scheme consists of several subunits and has 5 dams and one hydropower station; main body is Lac de la Plate Taille (see separate entry of Plate Taille dam)	3: Fair	4.39757	50.2135
3251	Lac de la Plate Taille	Plate Taille	Eau d'Heure	Chaleroi	Belgium		1978	47	0	0	0	0	1	43	790	3.7	66.5	104	247	Navigation	This reservoir is the main body of the Lacs de l'Eau d'Heure scheme; see also Eau d'Heure dam	2: Good	4.3854	50.1854
3252		Horka	Libocky Potok	Sokolov	Czech Republic		1970	55	0	0	0	0	1	48	236	1.3	21.4	497	486	Hydroelectricity		2: Good	12.4912	50.1865
3253		Stanovice	Lomnicky Potok	Karlovy Vary	Czech Republic		1978	47	0	0	0	0	1	63	258	1.4	27.8	580	512	Flood control		2: Good	12.8786	50.1754
3254		Val Joly	Helpe Majeure	Maubeuge	France		1968	57	0	0	0	0	1	16	315	1.6	4.5	1889	169	Other		2: Good	4.11191	50.1182
3255		Zlutice	Strela	Karlovy Vary	Czech Republic		1968	57	0	0	0	0	1	27	235	1.5	12.8	1265	510	Water supply		2: Good	13.1271	50.0894
3256		Jesenice	Odrava	Cheb	Czech Republic		1961	64	0	0	0	0	1	22	753	7.6	60.1	3386	430	Flood control		2: Good	12.4759	50.0838
3257		Skalka	Ohre	Cheb	Czech Republic		1964	61	0	0	0	0	1	17	115	3.9	19.6	5403	485	Flood control		2: Good	12.3479	50.0793
3258		Vrane	Vltava	Praha	Czech Republic		1935	90	0	0	1	0	0	10	93	-99	11.1	101085	204	Hydroelectricity		3: Fair	14.3726	49.9367
3259		Esch-sur-Sure	Sure	Esch-sur-Sure	Luxembourg		1960	65	0	0	0	0	1	49	168	3.7	62	6002	315	Hydroelectricity		3: Fair	5.92138	49.9119
3260		Slapy	Vltava	Praha	Czech Republic		1957	68	0	0	0	0	1	70	260	13.9	269.3	78693	285	Hydroelectricity		3: Fair	14.4302	49.8243
3261		Hracholusky	Mze	Plzen	Czech Republic		1964	61	0	0	0	0	1	34	270	4.1	42.4	11289	368	Flood control		2: Good	13.1718	49.7929
3262		Kamyk	Vltava	Pribram	Czech Republic		1963	62	0	0	0	0	1	24	186	2	12.8	76299	300	Hydroelectricity		3: Fair	14.2462	49.6338
3263		Orlik	Vltava	Pribram	Czech Republic		1963	62	0	0	0	0	1	91	450	27.3	716.5	76033	339	Hydroelectricity		3: Fair	14.1811	49.6049
3264		Eixendorf	Schwarzach	Neunburg	Germany		1976	49	0	0	0	0	1	28	130	1.8	19.3	4955	440	Flood control		2: Good	12.4475	49.3552
3265		Nyrsko	Uhlava	Klatovy	Czech Republic		1969	56	0	0	0	0	1	36	337	-99	20.8	909	533	Water supply		2: Good	13.1469	49.2595
3266	Rothsee	Rothsee	Kleine Roth	Roth	Germany		1993	32	0	0	0	0	1	19	1600	2.2	11.7	299	366	Other	Main purpose: flow regulation	1: Verified	11.1785	49.2157
3267		Hnevkovice	Vltava	Tyn nad Vltavou	Czech Republic		1991	34	0	0	0	0	1	31	153	3.1	22.2	26383	375	Hydroelectricity		2: Good	14.4482	49.1801
3268	Altmuehlsee	Altmuehlsee	Altmuehl	Gunzenhausen	Germany		1976	49	0	0	0	0	1	6	12500	4.5	13.9	4928	413	Flood control		1: Verified	10.7353	49.127
3269	Brombachsee	Brombach	Brombach	Gunzenhausen	Germany		1992	33	0	0	0	0	1	40	1800	9.3	129	421	393	Other	There are two smaller adjacent reservoirs: Kleiner Brombachsee and Igelsbachsee; Main purpose: flow regulation and interbasin transfer	1: Verified	10.9629	49.127
3270		Frauenau	Kleiner Regen	Zwiesel	Germany		1983	42	0	0	0	0	1	86	640	0.9	20.3	385	761	Water supply		2: Good	13.3365	49.014
3271		Madine	Rupt de Madine		France		1972	53	0	0	0	0	1	-99	-99	-99	33	435	221			3: Fair	5.75842	48.9175
3272		Rimov	Malse	Ceske Budejovi	Czech Republic		1978	47	0	0	0	0	1	48	290	2.1	33.6	3664	471	Water supply		2: Good	14.4896	48.8481
3273		Lipno 1	Vltava	Cesky Krumlov	Czech Republic		1960	65	0	0	0	0	1	42	282	50	306	10444	727	Hydroelectricity		3: Fair	14.2349	48.6344
3274	Lac du Der-Chantecoq	Giffaumont	Droyes	Vitry le Francois	France		1974	51	0	0	0	0	1	22	3175	48	364.5	733	134	Flood control		3: Fair	4.71116	48.6011
3275		Vieux Pre	Vieux Pre		France		1985	40	0	0	0	0	1	-99	-99	-99	55	129	388			3: Fair	6.92213	48.4571
3276	Rottauensee	Postmuenster	Rott	Pfarrkirchen	Germany		1972	53	0	0	0	0	1	13	1100	2.8	13.1	9036	385	Flood control		2: Good	12.897	48.4201
3277	Lac de Dienville	Radonvilliers	Amance		France		1986	39	0	0	0	0	1	-99	-99	-99	23.5	304	125			3: Fair	4.50209	48.3547
3278	Lac du Temple	Brevonnes	Auzon Temple	Brienne le Chat	France		1989	36	0	0	0	0	1	22	10500	20	157.8	410	130	Flood control		3: Fair	4.45627	48.3472
3279	Lac d'Orient	Morge et Beaumont	Morge	Troyes	France		1965	60	0	0	0	0	1	26	2780	23	217	328	130			3: Fair	4.30625	48.2522
3280	Isarkanal Reservoir	Isarkanal Dam	Isarkanal	Muenchen	Germany		1929	96	0	1	0	0	0	14	-99	-99	14.5	3498	494	Flood control		3: Fair	11.7966	48.2195
3281		Kruth Wildenstein	Thur		France		1964	61	0	0	0	0	1	-99	-99	-99	12	447	553			3: Fair	6.95507	47.9483
3282		Charmes	Ruisseau de Poiseul	Langres	France		1906	119	1	0	0	0	0	12	1254	1.9	11.6	621	350	Navigation		3: Fair	5.35743	47.9152
3283	Traunsee	Gmunden	Traun	Gmunden	Austria		1969	56	0	0	0	0	1	25	103	24.5	514	44847	429	Hydroelectricity	Run-of-river station below Traunsee; the 'Traunsee' is a natural lake, and it is not clear whether the dam actually influences its level (more likely not)	3: Fair	13.8003	47.9168
3284		Liez	Liez	Langres	France		1885	140	1	0	0	0	0	17	485	2.8	16.1	417	352	Navigation		2: Good	5.37389	47.8676
3285		Schluchsee	Schwarza	St. Blasien	Germany		1932	93	0	0	1	0	0	64	250	5.1	108	919	919	Hydroelectricity		3: Fair	8.18577	47.8025
3286		Ban de Champagney	Prise Rahin	Champagney	France		1926	99	0	1	0	0	0	40	785	1	13	95	395			2: Good	6.72604	47.6828
3287		Rosshaupten	Lech	Fussen	Germany		1954	71	0	0	0	0	1	41	320	16	165	42607	783	Hydroelectricity		3: Fair	10.7427	47.6532
3288		Rottachsee	Rottach	Kempten	Germany		1990	35	0	0	0	0	1	38	190	3.1	28.4	840	842	Other		2: Good	10.3621	47.6331
3289		Gruntensee	Wertach	Kempten	Germany		1961	64	0	0	0	0	1	21	170	2.5	16	2052	896	Flood control		3: Fair	10.4589	47.6199
3290		Sylvenstein	Isar	Bad Tolz	Germany		1959	66	0	0	0	0	1	45	180	6.1	104	28612	768	Flood control		3: Fair	11.551	47.5846
3292		Crescent	Cure	Avallon	France		1932	93	0	0	1	0	0	39	330	1.4	14.7	3784	283	Hydroelectricity		2: Good	3.90747	47.3845
3293		Chaumecon	Chalaux	Avallon	France		1933	92	0	0	1	0	0	43	196	1.5	19.2	965	398			2: Good	3.91777	47.3017
3294		Durlassboden	Gerlosbach	Zell am Ziller	Austria		1966	59	0	0	0	0	1	83	470	1.9	53.5	864	1383	Hydroelectricity		2: Good	12.0863	47.2363
3295		Finstertal	Finstertalbach	Oetz	Austria		1980	45	0	0	0	0	1	150	656	1	60.5	112	2281	Hydroelectricity		3: Fair	11.024	47.197
3296		Settons	Cure	Montsauche	France		1858	167	1	0	0	0	0	22	267	3.6	22.7	476	593	Navigation		2: Good	4.05802	47.1963
3297	Wasserfallboden Reservoir	Limberg	Kapruner Ache	Zell am See	Austria		1951	74	0	0	0	0	1	120	357	1.5	86	1034	1592	Hydroelectricity		1: Verified	12.7195	47.1962
3298	Mooserboden Reservoir	Mooser	Kapruner Ache	Zell am See	Austria		1955	70	0	0	0	0	1	107	494	1.7	87	464	1941	Hydroelectricity		2: Good	12.7197	47.167
3299		Panneciere Chaumard	Yonne	Chateau Chinon	France		1950	75	0	0	0	1	0	50	340	5.2	82.5	2225	290	Water supply		2: Good	3.87462	47.1629
3300	Tauernmoossee	Tauernmoossee	Stubache	Mittersill	Austria		1973	52	0	0	0	0	1	53	1100	1.9	57	504	2007	Hydroelectricity		1: Verified	12.6438	47.1562
3301	Wagitalersee	Huehnermatt in den Schlagen	Sihl	Einsiedeln	Switzerland		1937	88	0	0	1	0	0	17	191	10.9	96.5	5650	881	Hydroelectricity	Two dams for this reservoir	3: Fair	8.78126	47.1517
3302		Zillergruendl	Ziller	Mayrhofen	Austria		1986	39	0	0	0	0	1	186	506	1.4	90	601	1799	Hydroelectricity		2: Good	12.0619	47.1215
3303		Schrah	Wagitaler Aa	Siebnen	Switzerland		1924	101	1	0	0	0	0	111	150	4.2	150	1464	901	Hydroelectricity		3: Fair	8.90625	47.1053
3304		Le Chatelot	Doubs	La Chaux-de-Fonds	France	Switzerland	1953	72	0	0	0	0	1	74	148	0.7	20.6	32019	695	Hydroelectricity		3: Fair	6.74547	47.1004
3305		Koelnbrein	Malta	Gmuend	Austria		1977	48	0	0	0	0	1	200	626	2.3	205	1075	1846	Hydroelectricity		2: Good	13.3344	47.0821
3306		Schlegeis	Zamser Bach	Mayrhofen	Austria		1971	54	0	0	0	0	1	131	725	2.2	129	1209	1700	Hydroelectricity		3: Fair	11.7046	47.0377
3307	Kloentalersee	Rhodannenberg	Lontsch	Glarus	Switzerland		1910	115	1	0	0	0	0	30	217	3.3	56.4	3198	844	Hydroelectricity	Used to be a much smaller natural lake	2: Good	9.00501	47.0343
3308		Muehleberg	Aare	Bern	Switzerland		1920	105	1	0	0	0	0	29	250	3.6	25	105046	481	Hydroelectricity		3: Fair	7.28437	46.9675
3309		Gepatsch	Faggenbach	Prutz	Austria		1964	61	0	0	0	0	1	153	600	2.6	140	2401	1718	Hydroelectricity		3: Fair	10.74	46.9556
3310		Schiffenen	Sarine	Laupen	Switzerland		1963	62	0	0	0	0	1	47	417	4.3	65	31319	509	Hydroelectricity		2: Good	7.19185	46.8828
3311		Limmern	Limmernbach	Linthal	Switzerland		1963	62	0	0	0	0	1	146	375	1.4	93	653	1788	Hydroelectricity		3: Fair	9.01115	46.8437
3312		Cacano	Adda	Sondrio	Italy		1956	69	0	0	0	0	1	136	381	-99	123	4383	1488	Hydroelectricity		3: Fair	10.5302	46.7782
3313		Rossens	Sarine	Fribourg	Switzerland		1947	78	0	0	0	1	0	83	320	9.6	220	22471	680	Hydroelectricity		3: Fair	7.11275	46.717
3314		Goescheneralp	Goeschener Reuss	Goeschenen	Switzerland		1960	65	0	0	0	0	1	155	540	1.3	76	2076	1774	Hydroelectricity		3: Fair	8.49605	46.6447
3315		Nalps	Rein da Nalps	Sedrun	Switzerland		1962	63	0	0	0	0	1	127	480	0.9	45	967	1894	Hydroelectricity		3: Fair	8.76284	46.6378
3316		Curnera	Rein da Curnera	Sedrun	Switzerland		1966	59	0	0	0	0	1	153	350	0.8	41.1	1108	1945	Hydroelectricity		3: Fair	8.71326	46.634
3317		Edling	Drau	Voelkermarkt	Austria		1962	63	0	0	0	0	1	36	104	10.5	83	203496	417	Hydroelectricity		3: Fair	14.7008	46.6302
3318	Lago del Gallo	Punt dal Gall	Spol	Zernez	Switzerland	Italy	1968	57	0	0	0	0	1	130	540	4.7	164.6	6440	1774	Hydroelectricity		3: Fair	10.1906	46.6221
3319		Gelmer	Diechterbach	Innertkirchen	Switzerland		1929	96	0	1	0	0	0	35	370	0.6	14	799	1843	Hydroelectricity		3: Fair	8.32416	46.6119
3320		Raterichsboden	Aare	Innertkirchen	Switzerland		1950	75	0	0	0	1	0	94	456	0.7	27	5264	1744	Hydroelectricity		3: Fair	8.32428	46.5882
3321		Santa Maria	Rhein da Medel	Disentis	Switzerland		1968	57	0	0	0	0	1	117	560	1.8	67.3	1101	1881	Hydroelectricity		3: Fair	8.79888	46.5853
3322		Zervreila	Valserrhein	Vals	Switzerland		1957	68	0	0	0	0	1	151	504	1.6	100.5	2341	1837	Hydroelectricity		3: Fair	9.11736	46.5777
3323	Grimsel	Spitallamm	Aare	Innertkirchen	Switzerland		1932	93	0	0	1	0	0	114	258	2.7	101	4807	1831	Hydroelectricity	Two dams for this reservoir	3: Fair	8.33229	46.5719
3324		Sufers	Hinterrhein	Andeer	Switzerland		1962	63	0	0	0	0	1	58	125	0.9	21.4	6739	1404	Hydroelectricity		3: Fair	9.37952	46.5693
3325		Luzzone	Brenno di Luzzo	Olivone	Switzerland		1963	62	0	0	0	0	1	225	600	1.4	108	1494	1571	Hydroelectricity		2: Good	8.96512	46.5636
3326		Lucendro	Gotthardreuss	Airolo	Switzerland		1947	78	0	0	0	1	0	73	269	0.5	25	335	2108	Hydroelectricity		3: Fair	8.54672	46.5635
3327		Annabruecke	Drau	Klagenfurt	Austria		1981	44	0	0	0	0	1	40	104	3.5	36	158826	403	Hydroelectricity		2: Good	14.4715	46.5626
3328		Sella	Sella	Airolo	Switzerland		1947	78	0	0	0	1	0	36	334	-99	9.2	290	2219	Hydroelectricity		3: Fair	8.59564	46.5582
3329		Ferlach-Maria Rain	Drau	Ferlach	Austria		1975	50	0	0	0	0	1	40	97	5.9	33	155433	451	Hydroelectricity		3: Fair	14.2971	46.5469
3330		Oberaar	Oberaarbach	Innertkirchen	Switzerland		1953	72	0	0	0	0	1	100	526	1.5	61	898	2269	Hydroelectricity		2: Good	8.27187	46.5465
3331	Zoggler Reservoir	Zoccolo	Valsura	Bolzano	Italy		1965	60	0	0	0	0	1	67	516	1.4	33.7	3877	1112	Hydroelectricity		3: Fair	10.9889	46.5389
3333		Feistritz-Ludmannsdorf	Drau	Klagenfurt	Austria		1968	57	0	0	0	0	1	38	95	4.8	50	154425	450	Hydroelectricity		3: Fair	14.1675	46.5325
3334		S. Giacomo di Fraele	Adda	Sondrio	Italy		1950	75	0	0	0	1	0	92	970	2.3	64.3	1258	1878	Hydroelectricity		3: Fair	10.3182	46.5183
3335		Marmorera	Julia	Bivio	Switzerland		1954	71	0	0	0	0	1	91	400	1.4	62.6	3100	1640	Hydroelectricity		3: Fair	9.63266	46.5084
3336		Valle di Lei	Reno di Lei	Cresta	Switzerland		1961	64	0	0	0	0	1	141	690	4	200	1651	1890	Hydroelectricity		3: Fair	9.45284	46.4803
3337		Naret 1	Maggia	Fusio	Switzerland		1970	55	0	0	0	0	1	80	440	0.7	31.6	98	2262	Hydroelectricity	Two dams for this reservoir	3: Fair	8.57161	46.4802
3338		Cardenello	Liro	Sondrio	Italy		1932	93	0	0	1	0	0	75	245	1.7	32.4	812	1876	Hydroelectricity	Two dams for this reservoir	3: Fair	9.34792	46.4771
3339		Fedaia	Avisio	Trento	Italy		1955	70	0	0	0	0	1	57	622	0.6	16	142	2035	Hydroelectricity		3: Fair	11.8654	46.4611
3340		Gries	Agene	Ulrichen	Switzerland		1965	60	0	0	0	0	1	60	400	0.6	18.6	354	2363	Hydroelectricity		3: Fair	8.36989	46.4597
3341		Sambuco	Maggia	Fusio	Switzerland		1956	69	0	0	0	0	1	130	363	1.1	63	1459	1407	Hydroelectricity		2: Good	8.65926	46.4572
3342		Cavagnoli	Bavona	Bignasco	Switzerland		1968	57	0	0	0	0	1	111	320	-99	29	129	2318	Hydroelectricity		2: Good	8.50666	46.4546
3343		Eguzon	Creuse	Argenton sur Creuse	France		1926	99	0	1	0	0	0	61	300	3.1	54.4	24034	201	Irrigation		3: Fair	1.61441	46.452
3344		Valtoggia	Roni	Verbano	Italy		1932	93	0	0	1	0	0	46	199	0.8	15.7	585	2172	Hydroelectricity		2: Good	8.43247	46.4373
3345		Careser	Careser	Trento	Italy		1934	91	0	0	1	0	0	66	444	-99	15.6	204	2583	Hydroelectricity		2: Good	10.7021	46.427
3346		Hongrin Nord	Hongrin	Aigle	Switzerland		1969	56	0	0	0	0	1	125	325	1.6	53.2	790	1299	Hydroelectricity	Two dams for this reservoir	3: Fair	7.0451	46.4257
3347		Morasco	Gries	Verbano	Italy		1940	85	0	0	1	0	0	59	565	0.6	17.6	1851	1843	Hydroelectricity		2: Good	8.40027	46.4251
3349		Pieve di Cadore	Piave	Belluno	Italy		1949	76	0	0	0	1	0	112	410	2.4	71.6	15805	690	Hydroelectricity		3: Fair	12.3886	46.4248
3350		Sabbione	Sabbione	Verbano	Italy		1953	72	0	0	0	0	1	64	279	1.2	26	709	2431	Hydroelectricity		3: Fair	8.34743	46.4216
3351		Vouglans	Ain	Dortan	France		1968	57	0	0	0	0	1	130	425	17	605	44026	421	Hydroelectricity		3: Fair	5.66585	46.3982
3352		Vannino	Vannino	Verbano	Italy		1921	104	1	0	0	0	0	39	120	-99	10.1	556	2151	Hydroelectricity		3: Fair	8.36042	46.3807
3353		Lago Truzzo	Truzzo	Sondrio	Italy		1928	97	0	1	0	0	0	35	228	0.7	20.8	305	2063	Hydroelectricity		3: Fair	9.31495	46.3614
3354		Zeuzier	Lienne	Sion	Switzerland		1957	68	0	0	0	0	1	156	256	0.8	51	367	1724	Hydroelectricity	Two dams for this reservoir	3: Fair	7.43448	46.3489
3355		Santa Giustina	Noce	Trento	Italy		1950	75	0	0	0	1	0	153	124	3.6	182.8	24587	518	Hydroelectricity		2: Good	11.0609	46.3493
3356		Codelago	D'Arbola	Verbano	Italy		1921	104	1	0	0	0	0	33	116	1	16.5	1383	1860	Hydroelectricity		2: Good	8.28438	46.3362
3357		Albigna	Albigna	Vicosoprano	Switzerland		1959	66	0	0	0	0	1	115	759	1.1	71	677	2084	Hydroelectricity		3: Fair	9.64792	46.3349
3358		Pian Palu	Noce	Trento	Italy		1959	66	0	0	0	0	1	52	180	0.6	15.5	1010	1790	Hydroelectricity		3: Fair	10.6094	46.3342
3359		Alpe Gera	Cormor	Sondrio	Italy		1964	61	0	0	0	0	1	174	528	1.1	52	1181	2078	Hydroelectricity		3: Fair	9.94464	46.3162
3360		Forte Buso	Travignolo	Trento	Italy		1953	72	0	0	0	0	1	110	321	0.8	32.1	1529	1472	Hydroelectricity		2: Good	11.7033	46.3048
3361		Coiselet	Ain	Oyonnax	France		1971	54	0	0	0	0	1	48	205	3.8	36	69573	324	Hydroelectricity		2: Good	5.59395	46.2948
3362		Agaro	Agaro	Verbano	Italy		1940	85	0	0	1	0	0	57	243	0.7	20.1	555	1578	Hydroelectricity		3: Fair	8.30321	46.2943
3363		Ca Selva	Silisia	Pordenone	Italy		1965	60	0	0	0	0	1	111	237	1.1	36	978	475			2: Good	12.6981	46.2608
3364		Rochebut	Cher	Montlucon	France		1909	116	1	0	0	0	0	50	98	1.6	25.8	14773	305	Hydroelectricity		3: Fair	2.53125	46.2385
3365		Cize Bolozon	Ain	Nantua	France		1931	94	0	0	1	0	0	29	155	2.6	14.5	89505	290	Hydroelectricity		3: Fair	5.46633	46.2104
3366		Contra	Verzasca	Locarno	Switzerland		1965	60	0	0	0	0	1	220	380	1.7	105	10390	377	Hydroelectricity		2: Good	8.84926	46.1957
3367		Mis	Mis	Belluno	Italy		1962	63	0	0	0	0	1	91	157	1.3	42.8	2366	430	Hydroelectricity		2: Good	12.0803	46.1616
3368		Moiry	Gougra	Grimentz	Switzerland		1958	67	0	0	0	0	1	148	610	1.4	78	792	2205	Hydroelectricity		2: Good	7.56957	46.1351
3369		Allement	Ain	Amberieu en Bugey	France		1960	65	0	0	0	0	1	41	229	2.3	19	91256	279	Irrigation		2: Good	5.42274	46.1124
3370		Frera	Belviso	Sondrio	Italy		1959	66	0	0	0	0	1	138	316	1.1	51.8	811	1443	Hydroelectricity		3: Fair	10.1353	46.1003
3371		Grande Dixence	Dixence	Heremence	Switzerland		1961	64	0	0	0	0	1	285	695	4.3	400	1301	2260	Hydroelectricity	Dixence Dam (1935) was replaced by Grande Dixence (1961)	3: Fair	7.4021	46.0796
3372		Emosson	Barberine	Finhaut	Switzerland		1974	51	0	0	0	0	1	180	555	3.3	227	798	1870	Hydroelectricity		3: Fair	6.9303	46.0691
3373		Genissiat	Rhone	Annecy	France		1948	77	0	0	0	1	0	104	235	3.8	50	356583	365	Hydroelectricity		3: Fair	5.81366	46.0533
3374		Malga Bissina	Chiese	Trento	Italy		1957	68	0	0	0	0	1	84	563	1.4	60	1349	1737	Hydroelectricity		3: Fair	10.5177	46.054
3375		Saint Pardoux	Couze		France		1975	50	0	0	0	0	1	-99	-99	-99	22	899	364			3: Fair	1.26843	46.0514
3376		Mattmark	Saaser Vispa	Saas Almagell	Switzerland		1967	58	0	0	0	0	1	120	780	1.8	101	1277	2150	Hydroelectricity		3: Fair	7.95937	46.0467
3377		Lago d'Arno	Poglia-Arno	Brescia	Italy		1927	98	0	1	0	0	0	40	159	0.9	38.8	354	1837	Hydroelectricity		3: Fair	10.4323	46.0463
3378		Malga Boazzo	Chiese	Trento	Italy		1955	70	0	0	0	0	1	57	440	1.1	12.9	2675	1282	Hydroelectricity		2: Good	10.5218	45.9971
3379		Mauvoisin	Drance de Baanes	Fionnay	Switzerland		1957	68	0	0	0	0	1	250	520	2.1	211.5	3277	1898	Hydroelectricity		3: Fair	7.34881	45.9968
3380		Villerest	Loire	Roanne	France		1984	41	0	0	0	0	1	70	470	7.7	138	60644	315	Flood control		3: Fair	4.04479	45.9845
3381		Les Fades	Sioule	Clermont Ferrand	France		1968	57	0	0	0	0	1	68	235	3.9	69	16302	500	Hydroelectricity		3: Fair	2.79698	45.9733
3382		Lago Goillet	Marmore	Aosta	Italy		1947	78	0	0	0	1	0	49	368	-99	11.8	102	2497	Hydroelectricity		2: Good	7.66563	45.9312
3383		Saint Marc	Taurion	Limoges	France		1930	95	0	1	0	0	0	45	170	1.6	20	11756	283	Hydroelectricity		2: Good	1.45765	45.9282
3384	Lac des Toules	Les Toules	Drance d'Entre	Bourg Saint-Bernard	Switzerland		1963	62	0	0	0	0	1	86	460	0.6	20.1	1078	1759	Hydroelectricity		3: Fair	7.20014	45.9252
3385		Place Moulin	Buthier	Aosta	Italy		1965	60	0	0	0	0	1	155	678	1.8	106	2277	1849	Hydroelectricity		3: Fair	7.49497	45.8984
3386		Cignana 1	La Plana	Aosta	Italy		1928	97	0	1	0	0	0	58	508	0.7	16.1	367	2139	Hydroelectricity		3: Fair	7.59374	45.8805
3387		Lavaud Gelade	Taurion	Bourganeuf	France		1942	83	0	0	0	1	0	22	250	2.9	21.4	629	670	Hydroelectricity		2: Good	1.95361	45.8564
3388		Lavaud	Charente		France		1988	37	0	0	0	0	1	-99	-99	-99	10.5	550	216			3: Fair	0.6832	45.8253
3389		Le Mas Chaban	La Moulde		France		1999	26	0	0	0	0	1	-99	-99	-99	14.2	671	212			3: Fair	0.644884	45.8176
3390		Vassiviere	Maulde	Bourganeuf	France		1951	74	0	0	0	0	1	38	230	9.7	107	1041	643	Irrigation		2: Good	1.8534	45.8135
3391		Speccheri	Leno Vallarsa	Trento	Italy		1957	68	0	0	0	0	1	157	192	-99	10	207	794	Hydroelectricity		3: Fair	11.1369	45.766
3393		La Gittaz	Gittaz	Beaufort	France		1967	58	0	0	0	0	1	67	165	-99	13	441	1530	Hydroelectricity		3: Fair	6.64913	45.711
3394		Roselend	Doron de Beaufort	Albertville	France		1961	64	0	0	0	0	1	150	806	3	187	801	1508	Hydroelectricity		3: Fair	6.62293	45.6842
3395	Maggiore	Miorina	Ticino	Varese	Italy		1942	83	0	0	0	1	0	14	200	210	426	310830	188			2: Good	8.6822	45.6735
3396		Beauregard	Dora di Valgrisenche	Aosta	Italy		1960	65	0	0	0	0	1	132	394	2	74	2169	1734	Hydroelectricity	Polygon too small?	3: Fair	7.05875	45.6178
3397		Monceaux la Virole	Vezere	Uzerche	France		1946	79	0	0	0	1	0	34	123	1.8	20.5	3205	671	Hydroelectricity		3: Fair	1.88304	45.5863
3398		Tignes	Isere	Albertville	France		1952	73	0	0	0	0	1	180	-99	3	235	3506	1735	Hydroelectricity		3: Fair	6.93164	45.4932
3399		Piantelessio	Piantonetto	Torino	Italy		1955	70	0	0	0	0	1	80	515	0.5	24	423	1869	Hydroelectricity		3: Fair	7.36875	45.4859
3400		La Sassiere	Torrent de la Sassiere	Albertville	France		1959	66	0	0	0	0	1	30	300	-99	10.5	243	2446	Hydroelectricity		3: Fair	7.00751	45.4839
3401		Grangent	Loire	St Etienne	France		1957	68	0	0	0	0	1	55	200	3.6	57.4	39504	426	Hydroelectricity		2: Good	4.25312	45.4632
3402		Serru	Orco		Italy		1951	74	0	0	0	0	1	-99	-99	-99	14.5	208	2261			3: Fair	7.13114	45.4603
3404		Bort les Orgues	Dordogne	Bort les Orgues	France		1951	74	0	0	0	0	1	125	390	10.9	477.2	18549	539	Irrigation		3: Fair	2.49674	45.4137
3405		Mareges	Dordogne	Neuvic d'Ussel	France		1935	90	0	0	1	0	0	90	198	1.2	47	62550	419	Hydroelectricity		3: Fair	2.36442	45.394
3406		Neuvic d'Ussel	Triouzoune	Ussel	France		1945	80	0	0	0	1	0	27	145	2.9	23.6	2367	596	Irrigation		2: Good	2.29705	45.378
3407		Lokvarka	Lokvarka	Delnice	Croatia		1953	72	0	0	0	0	1	52	276	2.3	36.9	1309	766	Hydroelectricity		2: Good	14.7182	45.3602
3408		Botonega	Butoniga	Pazin	Croatia		1986	39	0	0	0	0	1	23	590	2.5	19.7	1703	35	Flood control		2: Good	13.924	45.3308
3409		La Valette	Doustre	Tulle	France		1949	76	0	0	0	1	0	50	163	2.2	31.3	3162	495	Hydroelectricity		2: Good	1.99842	45.2488
3410		L'Aigle	Dordogne	Mauriac	France		1947	78	0	0	0	1	0	92	290	5.5	220	83014	382	Irrigation		3: Fair	2.22722	45.2451
3411		Le Mont Cenis	Cenise	Modane	France		1968	57	0	0	0	0	1	120	1400	6.6	332.2	841	1930	Hydroelectricity		3: Fair	6.94791	45.2278
3412		Grand Maison	Eau d'Olle	Grenoble	France		1984	41	0	0	0	0	1	160	550	2.2	134.8	666	1641	Hydroelectricity		3: Fair	6.11969	45.2057
3413		Bissorte	Bissorte	Modane	France		1936	89	0	0	1	0	0	63	545	1.2	39.5	328	2034	Hydroelectricity		2: Good	6.58125	45.1798
3414		Le Chastang	Dordogne	Argentat	France		1951	74	0	0	0	0	1	85	300	7.1	187	105167	248	Irrigation		3: Fair	2.0107	45.1531
3415		Lavalette	Lignon du Velay	Saint Etienne	France		1914	111	1	0	0	0	0	60	507	2	41	4258	797	Other		2: Good	4.21053	45.1501
3416		Le Verney	Eau d'Olle	Grenoble	France		1984	41	0	0	0	0	1	44	430	0.8	14.5	2526	758	Hydroelectricity		3: Fair	6.04387	45.131
3417		Echanet	Maronne	Mauriac	France		1951	74	0	0	0	0	1	68	230	3.6	92.7	11111	414	Hydroelectricity		3: Fair	2.19565	45.0796
3418		Hautefage	Maronne	Argentat	France		1958	67	0	0	0	0	1	57	253	1.1	27	18522	233	Hydroelectricity		2: Good	1.99916	45.0655
3419		Le Chambon	Romanche	Grenoble	France		1934	91	0	0	1	0	0	136	294	1.2	54	3849	999	Hydroelectricity		3: Fair	6.13958	45.044
3420		Notre Dame de Commiers	Drac	Vif	France		1964	61	0	0	0	0	1	40	350	1.6	34	34239	367	Hydroelectricity		2: Good	5.6907	45.0051
3421		Monteynard	Drac	Monestier	France		1963	62	0	0	0	0	1	155	215	7	275	33891	564	Irrigation		3: Fair	5.69088	44.9602
3422		Saint Etienne Cantales	Cere	Aurillac	France		1945	80	0	0	0	1	0	75	270	5.6	133.5	14502	526	Hydroelectricity		3: Fair	2.22187	44.9426
3423		Grandval	Truyere	Saint Flour	France		1959	66	0	0	0	0	1	88	400	-99	292	24537	689	Hydroelectricity		3: Fair	3.07484	44.9211
3424		Lanau	Truyere	St. Flour	France		1962	63	0	0	0	0	1	32	178	1.1	18	25022	701	Hydroelectricity		3: Fair	3.00381	44.8924
3425		Saint Pierre Cognet	Drac	La Mure	France		1960	65	0	0	0	0	1	80	130	1.3	28	19695	606			3: Fair	5.80681	44.8757
3426		Sarrans	Truyere	Mur de Barrez	France		1932	93	0	0	1	0	0	113	220	10	296.3	34865	650	Hydroelectricity		3: Fair	2.74038	44.8318
3427		Le Sautet	Drac	Corps	France		1934	91	0	0	1	0	0	126	80	3.5	130	17722	805	Irrigation		3: Fair	5.912	44.8173
3428		Naussac	Donozau	Langogne	France		1981	44	0	0	0	0	1	51	240	11	190	780	957	Irrigation		3: Fair	3.82284	44.7466
3429		Couesque	Truyere	Aurillac	France		1950	75	0	0	0	1	0	70	272	2.6	56.1	41651	302	Hydroelectricity		3: Fair	2.58627	44.6981
3430		Maury	Selve	Rodez	France		1947	78	0	0	0	1	0	72	193	1.7	34.2	1733	624	Hydroelectricity		3: Fair	2.66875	44.6619
3431		Brugneto	Brugneto	Genova	Italy		1959	66	0	0	0	0	1	82	260	-99	25	650	786	Water supply		2: Good	9.20544	44.5383
3432		Castelnau	Lot		France		1949	76	0	0	0	1	0	-99	-99	-99	40.8	26043	430			3: Fair	2.8706	44.5096
3433		Serre Poncon	Durance	Gap	France		1960	65	0	0	0	0	1	129	600	28	1270	51762	757	Irrigation		3: Fair	6.27708	44.4735
3434		Villefort	Altier	Villefort	France		1965	60	0	0	0	0	1	75	225	1.4	35.7	2689	593	Hydroelectricity		2: Good	3.93068	44.4497
3435		Pont de Salars	Viaur	Rodez	France		1952	73	0	0	0	0	1	38	180	1.8	20.6	2694	723	Hydroelectricity		2: Good	2.72808	44.2873
3436		Pareloup	Vioulou	Rodez	France		1951	74	0	0	0	0	1	47	232	12.6	169.6	2344	802	Irrigation		3: Fair	2.71458	44.21
3437		Saint Lazare	Durance	Sisteron	France		1976	49	0	0	0	0	1	28	77	1.2	6.2	82952	460	Hydroelectricity		2: Good	5.95242	44.1775
3438		Villefranche de Panat	Alrance	Rodez	France		1951	74	0	0	0	0	1	23	332	1.9	10.9	633	720	Hydroelectricity		2: Good	2.70138	44.0915
3439		L'Escale	Durance	Chateau Arnoux	France		1962	63	0	0	0	0	1	29	720	2.3	15	87098	429	Hydroelectricity		3: Fair	6.01429	44.0867
3440		Pinet	Tarn	St. Affrique	France		1929	96	0	1	0	0	0	45	175	1.3	10	51505	329	Irrigation		3: Fair	2.81354	44.0684
3441		Saint Geraud	Cerou	Carmaux	France		1987	38	0	0	0	0	1	45	167	1	15	1082	369	Irrigation		2: Good	2.31582	44.0316
3442		Bilancino	Sieve	Firenze	Italy		1996	29	0	0	0	0	1	42	720	4.9	66.5	2190	243	Irrigation		2: Good	11.2798	43.9761
3443		Castillon	Verdon	Castellane	France		1948	77	0	0	0	1	0	100	200	5	149	8163	867	Irrigation		2: Good	6.53542	43.8813
3444		Ridracoli	Bidente	Forlu-Cesena	Italy		1982	43	0	0	0	0	1	104	433	1	33	455	555	Water supply		3: Fair	11.8379	43.8715
3445		Chaudanne	Verdon	Castellane	France		1952	73	0	0	0	0	1	74	95	0.7	16	8834	764	Irrigation		2: Good	6.54551	43.8496
3446		Rassisse	Dadou	Albi	France		1954	71	0	0	0	0	1	34	300	1.3	13	2885	360	Water supply		2: Good	2.34687	43.8059
3447		Bancalie Aval	Lezert		France		1978	47	0	0	0	0	1	-99	-99	-99	10.9	466	308			3: Fair	2.26179	43.7786
3448		Avene	Orb	Bedarieux	France		1962	63	0	0	0	0	1	63	230	1.9	33	2864	398	Irrigation		3: Fair	3.092	43.7662
3449	Lac de l'Esparron	Greoux	Verdon	Manosque	France		1967	58	0	0	0	0	1	67	220	3.3	80	24320	350	Hydroelectricity		3: Fair	5.9282	43.7502
3450		Sainte Croix	Verdon	Riez	France		1974	51	0	0	0	0	1	95	138	-99	767	22074	539	Irrigation		3: Fair	6.14126	43.7371
3451		Quinson	Verdon		France		1974	51	0	0	0	0	1	-99	-99	-99	19.5	22971	394			3: Fair	6.05378	43.6989
3452		Salagou	Salagou	Lodeve	France		1971	54	0	0	0	0	1	63	357	8.5	125	1750	121	Irrigation		3: Fair	3.40113	43.6551
3453		Laouzas	Vebre	Castres	France		1965	60	0	0	0	0	1	52	290	2.8	45.1	2502	766	Irrigation		3: Fair	2.7567	43.6362
3454		Saint Cassien	Biancon	Grasse Cannes	France		1966	59	0	0	0	0	1	66	210	3.7	60	2590	131	Hydroelectricity		2: Good	6.82978	43.5993
3455		La Raviege	Agout	Castres	France		1957	68	0	0	0	0	1	43	207	4.1	44.9	6172	663	Hydroelectricity		2: Good	2.59792	43.5936
3456		Montedoglio	Tevere	Arezzo	Italy		1993	32	0	0	0	0	1	63	288	8	168	3842	372	Irrigation		2: Good	12.0529	43.5897
3457		Bimont	Infernet	Aix en Provence	France		1952	73	0	0	0	0	1	87	190	-99	25	441	327	Water supply		3: Fair	5.53695	43.5408
3458		Saints Peyres	Arn	Mazamet	France		1934	91	0	0	1	0	0	61	180	2.1	34.7	2048	679	Hydroelectricity		2: Good	2.49098	43.5397
3459		Cammazes	Sor	Revel	France		1956	69	0	0	0	0	1	74	198	0.9	18.8	461	572	Irrigation		2: Good	2.09672	43.4058
3460		Astarac	Arrats	Bezues Bajon	France		1976	49	0	0	0	0	1	20	494	-99	10	498	245	Irrigation		3: Fair	0.636458	43.3885
3461		Castreccioni	Musone	Macerata	Italy		1985	40	0	0	0	0	1	67	280	0.4	37.3	1140	327	Irrigation		2: Good	13.1604	43.3807
3462		La Gimone	Gimone	Lunax	France		1991	34	0	0	0	0	1	29	616	2.3	25	444	270	Irrigation		2: Good	0.67708	43.3354
3463		Fiastrone	Fiastrone	Macerata	Italy		1954	71	0	0	0	0	1	87	254	0.9	21	972	636	Hydroelectricity		3: Fair	13.18	43.0565
3464	Lac de Montbel	Montbel	Triere	Mirepoix	France		1985	40	0	0	0	0	1	42	270	5.5	60	186	404	Irrigation	There are multiple dams for this reservoir	3: Fair	1.9594	42.9924
3465		Agly	Agly	Perpigan	France		1994	31	0	0	0	0	1	57	260	0.1	26	6411	168	Irrigation		2: Good	2.5898	42.7436
3466		Corbara	Tevere	Terni	Italy		1963	62	0	0	0	0	1	52	641	11.5	207	81702	130	Hydroelectricity		3: Fair	12.2324	42.7021
3467		Gnioure	Gnioure	Tarascon sur Ariege	France		1949	76	0	0	0	1	0	72	262	0.9	28.4	167	1846			3: Fair	1.53023	42.7011
3468		Laparan	Aston	Tarascon	France		1985	40	0	0	0	0	1	106	280	0.4	16	368	1516	Hydroelectricity		2: Good	1.70227	42.676
3469		Pla de Soulcem	Mounicou		France		1983	42	0	0	0	0	1	-99	-99	-99	29.3	382	1569			3: Fair	1.45044	42.6756
3470		Naguilhes	Gnoles	Ax les Thermes	France		1959	66	0	0	0	0	1	61	151	0.9	43	112	1930	Hydroelectricity		3: Fair	1.91784	42.6593
3471		Vinca	Tet	Perpignan	France		1977	48	0	0	0	0	1	60	190	1.8	24.6	14374	261	Irrigation		3: Fair	2.5425	42.6574
3472		Puyvalador	Aude	Axat	France		1932	93	0	0	1	0	0	39	161	1	10.1	1912	1426	Hydroelectricity		2: Good	2.1263	42.6467
3473		Villeneuve la Raho	Neant	Perpignan	France		1977	48	0	0	0	0	1	14	1200	-99	17.9	45	18	Irrigation		2: Good	2.91042	42.6313
3474		Le Lanoux	Font Vive	Ax les Thermes	France		1960	65	0	0	0	0	1	48	243	1.7	73	187	2180	Hydroelectricity		3: Fair	1.89678	42.5816
3475		Matemale	Aude	Montlouis	France		1959	66	0	0	0	0	1	37	984	2.2	20.5	366	1529	Water supply		3: Fair	2.10909	42.5744
3476		La Bouillouse	Tet	Montlouis	France		1910	115	1	0	0	0	0	25	384	-99	17.5	356	2009	Hydroelectricity		2: Good	2.00068	42.5615
3477	Lake Campostosto	Sella Pedicate Rio Fucino	Vomano	L'Aquila	Italy		1951	74	0	0	0	0	1	27	598	14.1	224	635	1313	Hydroelectricity	Two dams for this reservoir	3: Fair	13.3676	42.5154
3478		Boadella	Muga	Darnius	Spain		1968	57	0	0	0	0	1	63	250	3.6	62	2316	148	Irrigation		2: Good	2.83138	42.3439
3479		Escales	Noguera Ribagorzana	Sopeira	Spain		1955	70	0	0	0	0	1	125	200	4	152.4	9001	816	Hydroelectricity		3: Fair	0.743753	42.3279
3480		Calacuccia	Golo	Corte	France		1968	57	0	0	0	0	1	74	265	1.3	25.5	2532	768	Hydroelectricity		2: Good	9.02131	42.3293
3481		Mediano	Cinca	La Fueva	Spain		1959	66	0	0	0	0	1	92	500	17.3	438	25641	514	Hydroelectricity		3: Fair	0.210137	42.3149
3482		Alesani	Alesani	Bastia	France		1970	55	0	0	0	0	1	65	160	0.6	11.5	941	167	Irrigation		2: Good	9.48352	42.2985
3483		Salto	Salto	Rieti	Italy		1940	85	0	0	1	0	0	108	185	9.3	278	12337	536	Hydroelectricity		3: Fair	13.0271	42.2777
3484		Turano	Turano	Rieti	Italy		1938	87	0	0	1	0	0	80	256	4.9	163	7565	538	Hydroelectricity		2: Good	12.9441	42.2311
3485		Talarn	Noguera Pallaresa	Talarn	Spain		1916	109	1	0	0	0	0	86	180	9.3	205.1	20817	496	Hydroelectricity		3: Fair	0.915419	42.1815
3486		El Grado 1	Cinca	El Grado	Spain		1969	56	0	0	0	0	1	130	959	12.7	399	29769	447	Hydroelectricity		3: Fair	0.236023	42.1529
3487	Barasona	Barasona	Esera	La Puebla de Castro	Spain		1932	93	0	0	1	0	0	66	99	7.3	92.2	19201	448	Irrigation		3: Fair	0.315625	42.1277
3488		La Baells	Llobregat	Berga	Spain		1976	49	0	0	0	0	1	102	433	3.5	115.4	4276	622	Hydroelectricity		2: Good	1.88072	42.1237
3489		Oliana	Segre	Oliana	Spain		1959	66	0	0	0	0	1	90	262	4.4	101.1	21682	503	Irrigation		2: Good	1.29513	42.0937
3490		Terradets	Noguera Pallaresa	Llimiana	Spain		1935	90	0	0	1	0	0	47	160	3.3	33.2	24027	416	Hydroelectricity		3: Fair	0.887933	42.0569
3491		Bomba	Sangro	Chieti	Italy		1960	65	0	0	0	0	1	58	700	5.1	64	12717	250	Hydroelectricity		3: Fair	14.3563	42.0142
3492		Canelles	Noguera Ribagorzana	Estopinan del Castillo	Spain		1960	65	0	0	0	0	1	150	210	15.7	566.9	16595	494	Hydroelectricity		3: Fair	0.614583	41.9818
3493		Susqueda	Ter	Susqueda	Spain		1968	57	0	0	0	0	1	135	510	4.6	233	27181	267	Hydroelectricity		2: Good	2.52544	41.9795
3494		Sau	Ter	Vilanova de Sau	Spain		1963	62	0	0	0	0	1	84	260	5.7	168.5	24405	429	Irrigation		3: Fair	2.41145	41.97
3495		San Pons	Cardoner	Clariana de Cardener	Spain		1957	68	0	0	0	0	1	60	311	1.4	24.4	1903	524	Water supply		3: Fair	1.6053	41.9651
3496		Tolla	Prunelli	Ajaccio	France		1961	64	0	0	0	0	1	90	125	1.1	35	2061	600	Hydroelectricity		2: Good	8.96597	41.9642
3497		Rialb	Segre	La Baronia de Rialb	Spain		1999	26	0	0	0	0	1	96	595	15.1	402	25111	384	Irrigation	Polygon too small?	3: Fair	1.19253	41.9407
3498		Camarasa	Noguera Pallaresa	Camarasa	Spain		1920	105	1	0	0	0	0	103	145	6.2	163.4	25701	366	Hydroelectricity		2: Good	0.884203	41.9094
3499		Santa Ana	Noguera Ribagorzana	Castillonroy	Spain		1961	64	0	0	0	0	1	100	242	7.7	237	17387	372	Irrigation		3: Fair	0.585493	41.8848
3500		San Lorenzo Mongay	Segre	Camarasa	Spain		1930	95	0	1	0	0	0	25	944	1.3	9.5	55116	249	Irrigation		2: Good	0.836575	41.8565
3501	Lago di Guardialfiera	Ponte Liscione	Biferno	Campobasso	Italy		1970	55	0	0	0	0	1	60	497	7.5	148	11753	113	Water supply		3: Fair	14.856	41.8305
3502		Occhito	Fortore	Foggia	Italy		1966	59	0	0	0	0	1	60	432	13	333	9647	180	Water supply		3: Fair	14.9722	41.6183
3503		Mequinenza	Ebro	Mequinenza	Spain		1966	59	0	0	0	0	1	81	451	77.2	1533.8	469875	108	Hydroelectricity		3: Fair	0.271784	41.3694
3504		Ciurana	Ciurana	Cornudella de Montsant	Spain		1972	53	0	0	0	0	1	63	274	0.9	12.5	82	462	Irrigation		2: Good	0.914505	41.2518
3505		Ribarroja	Ebro	Ribaroja d'Ebre	Spain		1969	56	0	0	0	0	1	60	565	20.6	206.9	656695	60	Irrigation		2: Good	0.430615	41.2447
3506		Flix	Ebro	Flix	Spain		1948	77	0	0	0	1	0	26	400	3.2	11.4	629117	72	Irrigation		2: Good	0.540625	41.2335
3507		Caspe 2	Guadalope	Caspe	Spain		1989	36	0	0	0	0	1	54	398	6.4	81.6	4064	202	Water supply		3: Fair	0.000485	41.1372
3508	Liscia	Stretta di Calamaiu	Liscia	Sassari	Italy		1962	63	0	0	0	0	1	69	225	5.8	105.2	3255	189	Irrigation		3: Fair	9.27519	41.0142
3509		Casteldoria	Coghinas	Sassari	Italy		1963	62	0	0	0	0	1	36	97	1.5	8	30167	22	Hydroelectricity		2: Good	8.89785	40.885
3510		Pena	Pena	Valderrobres	Spain		1930	95	0	1	0	0	0	47	133	1.3	18.5	70	612	Irrigation		3: Fair	0.135449	40.8179
3511	Coghinas	Muzzone	Coghinas	Sassari	Italy		1926	99	0	1	0	0	0	58	186	17.9	252	24604	158	Hydroelectricity		3: Fair	9.02259	40.7881
3512		Maccheronis	Posada	Nuoro	Italy		1960	65	0	0	0	0	1	46	342	2.8	28	6750	39	Irrigation		2: Good	9.60625	40.6354
3513		Cuga	Cuga	Sassari	Italy		1961	64	0	0	0	0	1	53	220	-99	31.7	267	94	Irrigation		3: Fair	8.45629	40.611
3514		Monte Lerno	Rio Mannu	Sassari	Italy		1980	45	0	0	0	0	1	68	237	4.3	76	2009	541	Irrigation		2: Good	9.15104	40.5885
3515		Bidighinzu	Bidighinzu	Sassari	Italy		1959	66	0	0	0	0	1	34	227	-99	12.5	317	333	Water supply		2: Good	8.66563	40.5545
3516		Alto Temo	Temo	Sassari	Italy		1975	50	0	0	0	0	1	58	205	4.8	95.7	739	196	Irrigation		3: Fair	8.56321	40.4789
3518		Gusana	Taloro	Nuoro	Italy		1961	64	0	0	0	0	1	88	369	2.5	58.2	2469	637	Hydroelectricity		3: Fair	9.18963	40.1319
3519		Cucchinadorza	Taloro	Nuoro	Italy		1962	63	0	0	0	0	1	52	162	1.2	16.5	3583	343	Hydroelectricity		3: Fair	9.1324	40.1311
3521	Lago Omodeo	Cantoniera	Tirso	Oristano	Italy		1999	26	0	0	0	0	1	100	522	29	748	22996	51	Water supply	The new dam (built 1999, called 'Cantoniera' or 'Eleonora d'Arborea') inundated and replaced the old dam (built 1924, called 'Santa Chiara d'Ula Tirso') which was about 5 km upstream	2: Good	8.86042	40.0144
3522		Bau Muggeris	Flumendosa	Nuoro	Italy		1949	76	0	0	0	1	0	63	235	3.3	58	527	766	Hydroelectricity		3: Fair	9.42908	39.9514
3523		Is Barrocus	Fluminimannu	Nuoro	Italy		1991	34	0	0	0	0	1	38	171	1.2	12.2	929	401	Water supply		3: Fair	9.09035	39.7514
3524		Nuraghe Arrubiu	Fluemndosa	Nuoro	Italy		1959	66	0	0	0	0	1	119	315	-99	317	9266	241	Water supply		3: Fair	9.31462	39.6647
3525		Monte Su Rei	Mulargia	Nuoro	Italy		1958	67	0	0	0	0	1	-99	72	13	310	1676	223	Water supply		3: Fair	9.25482	39.6065
3526		Monte Pranu	Rio Palmas	Cagliari	Italy		1955	70	0	0	0	0	1	55	216	-99	62	2101	41	Irrigation		3: Fair	8.59097	39.0935
3527		Poma	Jato	Palermo	Italy		1968	57	0	0	0	0	1	53	376	6.1	68	1004	196	Irrigation		2: Good	13.0824	37.999
3528		Rosamarina	San Leonardo	Palermo	Italy		1992	33	0	0	0	0	1	93	200	5.5	100	2510	151	Irrigation		2: Good	13.649	37.9553
3529		Scanzano	Scanzano	Palermo	Italy		1962	63	0	0	0	0	1	40	530	1.7	16.4	207	521	Water supply		2: Good	13.3718	37.9222
3530		Rubino	Fastaia	Trapani	Italy		1971	54	0	0	0	0	1	39	465	1.3	11	250	177	Irrigation		2: Good	12.7179	37.8857
3531		Ancipa	Troina	Enna	Italy		1953	72	0	0	0	0	1	112	253	1.4	27.8	278	961	Hydroelectricity		3: Fair	14.5758	37.8311
3532		Garcia	Belice	Palermo	Italy		1984	41	0	0	0	0	1	45	1143	5.9	60	1996	187	Irrigation		2: Good	13.098	37.7896
3533		Trinita	Delia	Trapani	Italy		1959	66	0	0	0	0	1	29	322	2.4	17.5	1159	62	Irrigation		3: Fair	12.7521	37.694
3534		Pozzillo	Salso	Enna	Italy		1959	66	0	0	0	0	1	59	403	7.6	141	3042	357	Water supply		3: Fair	14.6093	37.6715
3535		Fanaco	Platani	Palermo	Italy		1958	67	0	0	0	0	1	66	203	1.5	20.5	195	670	Water supply		3: Fair	13.5534	37.6684
3536		Arancio	Carboi	Agrigento	Italy		1951	74	0	0	0	0	1	47	138	3.7	32.8	718	170	Water supply		2: Good	13.0651	37.6278
3537		Nicoletti	Bozzetta	Enna	Italy		1972	53	0	0	0	0	1	48	592	1.8	19.4	327	372	Irrigation		2: Good	14.3469	37.6075
3538		Villarosa	Morello	Enna	Italy		1971	54	0	0	0	0	1	40	450	1.3	10.4	448	389	Water supply		2: Good	14.2062	37.5815
3539		Lentini	Lentini	Siracusa	Italy		1991	34	0	0	0	0	1	36	8243	10	127	742	20	Water supply		3: Fair	14.9675	37.3193
3540		Disueri	Gela	Caltanisetta	Italy		1996	29	0	0	0	0	1	74	286	-99	14	741	142	Irrigation		2: Good	14.2871	37.1911
3547		Santa Rosalia	Irminio	Ragusa	Italy		1983	42	0	0	0	0	1	54	348	1.4	18.2	338	351	Irrigation		2: Good	14.7727	36.9704
3682		Masevatn Hoveddam	Friarfjordelv	Lakselv	Norway		1973	52	0	0	0	0	1	27	260	-99	183	905	181	Hydroelectricity		3: Fair	26.9396	70.3846
3683		Virdnejavri	Alta	Alta	Norway		1987	38	0	0	0	0	1	142	135	5.4	140	78527	252	Hydroelectricity		3: Fair	23.8163	69.7043
3684	Sundvatnet	Skogfoss Inntaksdam	Skogfoss		Norway	Russia	1964	61	0	0	0	0	1	15	-99	-99	450	135306	67	Navigation		2: Good	29.7073	69.3668
3685		Guolasjavrre	Guolasjokka	Tromso	Norway		1971	54	0	0	0	0	1	27	198	11.6	140	2166	771	Hydroelectricity		3: Fair	21.0671	69.3459
3686		Rieppejavri Hoveddam			Norway		1978	47	0	0	0	0	1	26	980	-99	145.6	975	483	Hydroelectricity		3: Fair	20.5968	69.2293
3687		Altevatn			Norway		1960	65	0	0	0	0	1	34	-99	79.7	1029	16381	491	Navigation		3: Fair	19.8506	68.4336
3688	Porttipahta	Porttipahta	Kitinen	Rovaniemi	Finland		1970	55	0	0	0	0	1	38	3500	214	1353	8308	229	Hydroelectricity		3: Fair	26.6882	68.1123
3689		Batsvatn Hoveddam	Kobbelv	Narvik	Norway		1973	52	0	0	0	0	1	43	250	-99	159.6	3713	884	Hydroelectricity		3: Fair	17.7746	68.0668
3690	Lokan Terkojarvi	Lokka	Luiro	Rovaniemi	Finland		1967	58	0	0	0	0	1	20	1730	417	1460	45639	229	Flood control		3: Fair	27.7354	67.8234
3692	Akkajaure	Suorvadammen	Lulealven	Suorva	Sweden		1972	53	0	0	0	0	1	30	240	271	5900	195917	449	Hydroelectricity	There are multiple dams for this reservoir; no data on others	2: Good	18.1695	67.5239
3693	Satisjaure	Vietas	Vietasjokk	Kiruna	Sweden		1966	59	0	0	0	0	1	30	1450	86	1260	23050	458	Hydroelectricity		2: Good	18.463	67.5041
3694	Sisovatn Reservoir	Sisovatn North Dam	Fagerbekkelv	Bodo	Norway		1972	53	0	0	0	0	1	15	394	12.8	561	3354	646	Hydroelectricity	Sisovatn reservoir is connected to other reservoirs or lakes (Rundvatnet, Loytavatnet) by underground tunnels	2: Good	15.8319	67.3346
3695		Seitevare	Blackalven	Porjus	Sweden		1967	58	0	0	0	0	1	106	2011	81	1675	41809	463	Hydroelectricity		2: Good	18.5686	66.9781
3696	Stora Lulevatten	Porjus	Lulealven	Porjus	Sweden		1914	111	1	0	0	0	0	-99	-99	184	610	256551	394	Hydroelectricity		2: Good	19.8068	66.9582
3697		Harspranget	Lulealven	Porjus	Sweden		1952	73	0	0	0	0	1	-99	-99	2	6.4	258112	304	Hydroelectricity		2: Good	19.8262	66.8864
3698		Ligga	Lulealven	Porjus	Sweden		1954	71	0	0	0	0	1	-99	-99	2	5.4	261147	218	Hydroelectricity		2: Good	19.8924	66.8082
3699	Parkijaure	Parki	Lilla Lulealven	Jokkmokk	Sweden		1970	55	0	0	0	0	1	28	-99	96	460	104927	278	Hydroelectricity		2: Good	19.1977	66.7396
3700		Messaure	Lulealven	Jokkmokk	Sweden		1963	62	0	0	0	0	1	-99	-99	23	54	275182	154	Hydroelectricity		2: Good	20.3396	66.6901
3701	Randijaure	Randi	Lilla Lulalven		Sweden		1976	49	0	0	0	0	1	-99	-99	53	98	118980	244	Hydroelectricity		2: Good	19.4017	66.6606
3702		Akkats	Lilla Lulealven	Jokkmokk	Sweden		1973	52	0	0	0	0	1	-99	-99	31	42	158799	244	Hydroelectricity		2: Good	19.8221	66.6434
3703		Letsi	Lilla Lulealven	Jokkmokk	Sweden		1967	58	0	0	0	0	1	85	608	18	68	166118	216	Hydroelectricity		2: Good	20.3562	66.4992
3704		Porsi	Lulealven	Jokkmokk	Sweden		1961	64	0	0	0	0	1	-99	-99	12	27	283329	94	Hydroelectricity		2: Good	20.6502	66.4457
3705		Rebnisjaure	Skelleftealven	Arjeplog	Sweden		1974	51	0	0	0	0	1	19	460	70	740	30123	490	Hydroelectricity		3: Fair	16.8046	66.4373
3706	Kemijarvi	Seitakorva	Kemijoki	Kemijarvi	Finland		1963	62	0	0	0	0	1	25	3490	310	1100	303016	133	Hydroelectricity	Natural Lake Kemijarvi existed before	2: Good	27.3443	66.4232
3707		Valajaskoski	Kemijoki	Rovaniemi	Finland		1960	65	0	0	0	0	1	21	610	-99	100.1	530220	91	Hydroelectricity		3: Fair	25.5403	66.4199
3709		Petajaskoski	Kemijoki	Rovaniemi	Finland		1957	68	0	0	0	0	1	23	11800	18.5	115.4	536699	50	Hydroelectricity		3: Fair	25.3552	66.286
3710		Laxede	Lulealven	Boden	Sweden		1962	63	0	0	0	0	1	-99	-99	11	15.1	464632	39	Hydroelectricity		2: Good	20.8881	66.2421
3711		Ossauskoski	Kemijoki		Finland		1965	60	0	0	0	0	1	-99	-99	-99	49.5	547276	31			3: Fair	25.1771	66.1611
3712		Taivalkoski	Kemijoki	Kemi	Finland		1975	50	0	0	0	0	1	25	800	19.5	50	565078	19	Hydroelectricity		3: Fair	24.7063	65.9364
3713		Isohaara	Kemijoki	Kemi	Finland		1948	77	0	0	0	1	0	24	5150	13.5	80	575720	9	Hydroelectricity		3: Fair	24.5493	65.7965
3714		Storavatn Bergnas	Skelleftealven		Sweden		1959	66	0	0	0	0	1	-99	-99	-99	778	93525	399	Water supply		3: Fair	18.1632	65.5907
3715		Ajaure	Umealven	Storuman	Sweden		1967	58	0	0	0	0	1	46	522	-99	200	109605	439	Hydroelectricity		3: Fair	15.6271	65.5115
3716		Gardiken	Umealven	Storuman	Sweden		1963	62	0	0	0	0	1	32	1070	-99	871	138348	398	Hydroelectricity		3: Fair	15.8503	65.4706
3717	Bastuselet	Bastusel	Skelleftealven	Arvidsjaur	Sweden		1973	52	0	0	0	0	1	35	830	40	29.7	96779	395	Hydroelectricity	There are multiple dams on the reservoir, and water is transfered via tunnel to the hydropower station	3: Fair	18.6169	65.4378
3718	Storjuktan	Storjuktandammen	Juktan	Storuman	Sweden		1963	62	0	0	0	0	1	22	-99	-99	575	28506	405	Hydroelectricity		2: Good	17.3154	65.3189
3719		Ransaren	Angermanalven	Vilhelmina	Sweden		1956	69	0	0	0	0	1	30	-99	-99	414	25493	596	Water supply		3: Fair	15.0531	65.1907
3720	Storuman	Umluspen	Umealven	Sweden	Sweden		1957	68	0	0	0	0	1	24	-99	150	1101	176906	351	Hydroelectricity		3: Fair	17.0298	65.1119
3721		Vojmsjon	Vojman	Sweden	Sweden		1950	75	0	0	0	1	0	16	-99	-99	594	26104	410	Water supply		3: Fair	16.7423	64.8702
3722		Dabbsjo	Saxan Fjallsjoalven	Ostersund	Sweden		1969	56	0	0	0	0	1	-99	-99	-99	335	25119	350	Hydroelectricity		3: Fair	15.4622	64.6081
3723	Oulujarvi	Jylhama	Oulujoki	Oulu	Finland		1950	75	0	0	0	1	0	15	3650	928	2343	227993	107	Hydroelectricity	Natural Lake Oulujarvi existed before	3: Fair	26.824	64.5396
3724		Uljua Dams	Siikajoki	Oulu	Finland		1970	55	0	0	0	0	1	16	8820	28	146	14441	68	Hydroelectricity		3: Fair	25.8748	64.3367
3726		Lovons	Faxalven		Sweden		1969	56	0	0	0	0	1	16	-99	-99	495	141481	275	Hydroelectricity		2: Good	15.5968	63.8379
3727	Hoytiainen	Puntarikoski	Canal of Hoytiainen	Joensuu	Finland		1957	68	0	0	0	0	1	14	150	293	2390	7071	67	Hydroelectricity	Lake was drained in 1859 to a third of its size; dam is at outlet at south end of lake	2: Good	29.4823	62.8252
3728		Hirvijarvi	Lapuanjoki	Seinajoki	Finland		1974	51	0	0	0	0	1	12	9000	15.5	40	809	85	Hydroelectricity		3: Fair	23.0536	62.8036
3729		Kuurna	Pielisjoki	Joensuu	Finland		1970	55	0	0	0	0	1	14	850	-99	90	227242	77	Hydroelectricity		3: Fair	29.8982	62.6903
3730		Leringsfors	Giman	Sundsvall	Sweden		1944	81	0	0	0	1	0	-99	-99	-99	360	31684	206	Hydroelectricity		3: Fair	16.4205	62.5789
3731		Kalajarvi	Kyronjoki	Seinajoki	Finland		1976	49	0	0	0	0	1	13	3150	11	42	152	105	Flood control		3: Fair	23.0995	62.5543
3732	Pyhajarvi	Melo	Kokemaenjoki	Tampere	Finland		1971	54	0	0	0	0	1	33	150	124.5	699	72483	72	Hydroelectricity		3: Fair	23.527	61.4603
3733	Saimaa	Tainionkoski	Vuoksi	Imatra	Finland		1948	77	0	0	0	1	0	17	700	4500	5600	606956	62	Hydroelectricity	Size of natural lake increased with dam	2: Good	28.7812	61.2271
3734		Motala	Motala Strom	Motala	Sweden		1921	104	1	0	0	0	0	-99	-99	1.9	160	35481	77	Hydroelectricity		3: Fair	15.276	58.5551
3735		Riga	Daugava	Riga	Latvia		1976	49	0	0	0	0	1	35	146	42.2	340	668613	11	Other		3: Fair	24.274	56.8511
3736		Kegums	Daugava	Ogre	Latvia		1947	78	0	0	0	1	0	21	508	24.8	157	639907	29	Hydroelectricity	Run-of-river hydropower plant; renovated 1998	3: Fair	24.7115	56.7387
3737		Plyavinass	Daugava	Riga	Latvia		1965	60	0	0	0	0	1	58	214	-99	510	626438	72	Other		2: Good	25.2397	56.5806
3738	Sea of Kupiskis	Kupiskio	Levuo	Kupiskis	Lithuania		1986	39	0	0	0	0	1	16	600	8.3	33.2	3147	76	Irrigation		2: Good	24.973	55.8523
3739		Kauno	Nemunas	Kaunas	Lithuania		1960	65	0	0	0	0	1	16	464	60	462	276055	39	Hydroelectricity		3: Fair	24.0031	54.8729
3741		Koronowo	Brda	Bydgoszcz	Poland		1960	65	0	0	0	0	1	25	340	15.6	80.6	28032	74	Hydroelectricity		3: Fair	17.9633	53.3324
3742		Wloclawek	Wisla	Wloclawek	Poland		1970	55	0	0	0	0	1	24	1200	70.4	408	975522	50	Hydroelectricity		2: Good	19.1358	52.6607
3743		Debe	Narew	Legionowo	Poland		1963	62	0	0	0	0	1	19	450	33	94.3	314081	74	Recreation		3: Fair	20.9245	52.4877
3744		Jeziorsko	Warta	Uniejow	Poland		1990	35	0	0	0	0	1	20	2720	42.3	202.8	39439	111	Irrigation		3: Fair	18.7103	51.8552
3745		Sulejow	Pilica	Tomaszow Mazowiecki	Poland		1974	51	0	0	0	0	1	21	1210	23.8	84.2	25001	159	Water supply		3: Fair	20.0021	51.4727
3746		Slup	Nysa Szalona	Legnica	Poland		1978	47	0	0	0	0	1	21	940	4.9	38.6	2697	171	Water supply		2: Good	16.1104	51.099
3747		Lesna	Kwisa	Luban Slaski	Poland		1906	119	1	0	0	0	0	45	130	1.4	15	3097	286	Hydroelectricity		2: Good	15.2904	51.0324
3748		Zlotniki	Kwisa	Luban Slaski	Poland		1924	101	1	0	0	0	0	36	168	1.3	12.4	2963	312	Hydroelectricity		2: Good	15.3349	51.0216
3749		Wiory	Swislina	Ostrowiec Swietokrzyski	Poland		2004	21	0	0	0	0	0	26	252	4.2	35	2819	187	Water supply		2: Good	21.1963	51.018
3750		Pilchowice	Bobr	Lwowek Slaski	Poland		1912	113	1	0	0	0	0	69	270	2.4	54	14395	279	Flood control		2: Good	15.649	50.9659
3751		Mietkow	Bystrzyca	Wroclaw	Poland		1986	39	0	0	0	0	1	17	3220	9.2	70	4384	160	Navigation		2: Good	16.6423	50.9523
3752		Dobromierz	Strzegomka	Dobromierz	Poland		1988	37	0	0	0	0	1	28	528	1	11.3	602	296	Water supply		2: Good	16.2436	50.9058
3753		Nielisz			Poland		1997	28	0	0	0	0	1	13	-99	8.3	19.5	5532	190	Flood control		2: Good	23.0344	50.8045
3754		Josefuv Dul	Kamenice	Jablonec nad Nisou	Czech Republic		1982	43	0	0	0	0	1	44	360	1.4	24.6	207	726	Water supply		2: Good	15.1937	50.7948
3755		Bukowka	Bobr	Lubawka	Poland		1988	37	0	0	0	0	1	38	300	2	16.8	650	518	Water supply		2: Good	15.9544	50.7164
3756		Chancza	Czarna Staszowska	Staszow	Poland		1985	40	0	0	0	0	1	22	412	4.7	20.6	2144	216	Water supply		3: Fair	21.0573	50.632
3757		Nysa	Nysa Klodzka	Nysa	Poland		1971	54	0	0	0	0	1	22	5750	20.4	116.8	24790	188	Flood control		2: Good	17.3047	50.4642
3758		Otmuchow	Nysa Klodzka	Nysa	Poland		1933	92	0	0	1	0	0	17	6500	19.8	124.5	20965	208	Flood control		2: Good	17.151	50.4614
3759		Kozlowa Gora			Poland		1937	88	0	0	1	0	0	8	-99	5.8	15.8	1204	274	Water supply		2: Good	18.976	50.4147
3760		Rozkos	Rozkos	Ceska Skalice	Czech Republic		1970	55	0	0	0	0	1	21	412	10	76.2	323	273	Irrigation		3: Fair	16.0623	50.361
3761	Imielin	Dzieckowice			Poland		1996	29	0	0	0	0	1	9	-99	7.1	52.5	14464	230	Water supply		3: Fair	19.2343	50.1117
3762		Goczalkowice	Wisla	Pszczyna	Poland		1956	69	0	0	0	0	1	16	3000	32	168.4	7630	247	Water supply		2: Good	18.9299	49.9329
3763		Slezska Harta	Moravice	Bruntal	Czech Republic		1997	28	0	0	0	0	1	65	540	9.4	217.5	3829	486	Water supply		2: Good	17.5802	49.8908
3764		Dobczyce	Raba	Myslenice	Poland		1988	37	0	0	0	0	1	41	728	10.7	127	8840	253	Water supply		3: Fair	20.0823	49.8756
3765		Sec	Chrudimka	Chrudim	Czech Republic		1934	91	0	0	1	0	0	37	160	-99	17.5	1242	491	Water supply		2: Good	15.6521	49.8382
3766		Kruzberk	Moravice	Opava	Czech Republic		1956	69	0	0	0	0	1	42	280	2.9	35.6	4523	469	Water supply		2: Good	17.659	49.8256
3767		Czchow	Dunajec	Nowy Sacz	Poland		1954	71	0	0	0	0	1	19	430	3.4	12	73659	227	Hydroelectricity		3: Fair	20.6798	49.8089
3768		Porabka	Sola	Zywiec	Poland		1937	88	0	0	1	0	0	37	260	3.8	26.6	14334	329	Hydroelectricity		3: Fair	19.2004	49.8067
3769		Terlicko	Stonavka	Havirov	Czech Republic		1962	63	0	0	0	0	1	28	617	2.5	24.4	880	263	Water supply		2: Good	18.5171	49.7726
3770		Roznow	Dunajec	Nowy Sacz	Poland		1941	84	0	0	0	1	0	49	550	16	167	68526	286	Hydroelectricity	Capacity of old reservoir may have been 9 mcm	3: Fair	20.6698	49.7589
3771		Tresna	Sola	Zywiec	Poland		1967	58	0	0	0	0	1	37	312	10.6	102.7	13649	364	Flood control		3: Fair	19.2088	49.7465
3772		Zermanice	Lucina	Frydek-Mistek	Czech Republic		1958	67	0	0	0	0	1	27	617	2.2	27.2	465	291	Water supply		2: Good	18.448	49.7308
3773		Svihov	Zelivka	Zruc nad Sazavou	Czech Republic		1975	50	0	0	0	0	1	58	850	14.3	266	5651	384	Water supply		3: Fair	15.0906	49.7261
3774		Vir 1	Svratka	Bystrice nad Pernstejnem	Czech Republic		1959	66	0	0	0	0	1	78	390	2.1	53.1	2820	445	Water supply		2: Good	16.3107	49.5656
3775		Letovice	Kretinka	Letovice	Czech Republic		1976	49	0	0	0	0	1	29	126	1	10.6	864	399	Water supply		2: Good	16.5553	49.5545
3776		Sance	Ostravice	Frydek-Mistek	Czech Republic		1971	54	0	0	0	0	1	65	342	3	45.5	1639	500	Water supply		2: Good	18.4187	49.5095
3777		Myczkowce	San	Lesko	Poland		1961	64	0	0	0	0	1	30	430	2	10	13496	357	Hydroelectricity		3: Fair	22.4103	49.4302
3778	Jezioro Czorsztynskie	Czorsztyn-Niedzica	Dunajec	Nowy Targ	Poland		1997	28	0	0	0	0	1	60	404	13.4	234.5	21614	498	Water supply		2: Good	20.3219	49.4203
3779		Mostiste	Oslava	Velke Mezirici	Czech Republic		1961	64	0	0	0	0	1	36	341	0.9	11	1102	467	Water supply		2: Good	16.0147	49.3954
3780		Solina	San	Lesko	Poland		1968	57	0	0	0	0	1	82	646	22	474	12851	415	Hydroelectricity		3: Fair	22.4519	49.3935
3781		Orava	Orava	Dolny Kubin	Slovakia		1953	72	0	0	0	0	1	41	291	35.1	346	17908	596	Flood control		3: Fair	19.5564	49.3779
3782		Nova Bystrica	Bystrica	Cadca	Slovakia		1991	34	0	0	0	0	1	64	320	1.8	36.9	799	593	Flood control		3: Fair	19.0438	49.3396
3783		Opatovice	Mala Hana	Vyskov	Czech Republic		1973	52	0	0	0	0	1	45	177	0.7	9.4	244	361	Water supply		2: Good	16.9294	49.3094
3784		Zilina	Vah	Zilina	Slovakia		1998	27	0	0	0	0	1	15	9000	-99	17.9	107222	323	Flood control		3: Fair	18.6823	49.2556
3785		Brno	Svratka	Brno	Czech Republic		1940	85	0	0	1	0	0	34	120	2.3	18.5	8803	244	Flood control		2: Good	16.5172	49.2347
3786		Dalesice	Jihlava	Trebic	Czech Republic		1979	46	0	0	0	0	1	100	300	4.8	127.3	4885	371	Hydroelectricity		2: Good	16.121	49.1248
3787		Nosice	Vah	Puchov	Slovakia		1957	68	0	0	0	0	1	33	472	5.7	35.9	118832	276	Hydroelectricity		3: Fair	18.366	49.1263
3788		Mohelno	Jihlava	Trebic	Czech Republic		1978	47	0	0	0	0	1	49	185	1.2	17.1	4944	304	Hydroelectricity		2: Good	16.1795	49.1023
3789		Besenova	Vah	Liptovsky Mikul	Slovakia		1978	47	0	0	0	0	1	13	1343	-99	9.8	26921	515	Hydroelectricity		3: Fair	19.4493	49.0973
3790		Liptovska Mara	Vah	Liptovsky Mikul	Slovakia		1976	49	0	0	0	0	1	53	1250	21.4	360.5	26093	554	Flood control		3: Fair	19.4857	49.0995
3791		Starina	Cirocha	Humenne	Slovakia		1989	36	0	0	0	0	1	53	372	3.1	59.8	1076	339	Water supply		3: Fair	22.2594	49.0442
3792		Velka Domasa	Ondava	Vranov	Slovakia		1966	59	0	0	0	0	1	35	350	14.9	180	5332	155	Flood control		3: Fair	21.6978	49.0028
3793		Vranov	Dyje	Znojmo	Czech Republic		1939	86	0	0	1	0	0	59	290	0.8	122.7	8858	331	Flood control		2: Good	15.8182	48.9077
3794		Nove Mlyny	Dyje	Breclav	Czech Republic		1989	36	0	0	0	0	1	10	37615	33.9	134	47846	165	Flood control		2: Good	16.722	48.8609
3795		Ruzin 1	Hornad	Kosice	Slovakia		1968	57	0	0	0	0	1	63	320	3.9	58	17032	326	Flood control		3: Fair	21.0888	48.8613
3796		Vihorlat	Laborec Cierna Voda	Michalovce	Slovakia		1965	60	0	0	0	0	1	14	5430	30.4	334	1194	109	Flood control		3: Fair	22.0479	48.7855
3797		Bukovec 2	Ida	Kosice	Slovakia		1976	49	0	0	0	0	1	56	333	1	23.4	315	416	Water supply		3: Fair	21.1264	48.7181
3799		Ottenstein	Kamp	Zwettl	Austria		1956	69	0	0	0	0	1	69	240	4.3	73	7266	479	Hydroelectricity		2: Good	15.3299	48.5923
3800		Dobra	Kamp	Zwettl	Austria		1953	72	0	0	0	0	1	53	234	1.5	21	7303	476	Irrigation		2: Good	15.3969	48.5924
3801	Slnava	Drahovce	Vah	Piestany	Slovakia		1960	65	0	0	0	0	1	23	7239	4.3	12.2	139488	152	Hydroelectricity		3: Fair	17.826	48.545
3802		Malinec	Ipel	Lucenec	Slovakia		1994	31	0	0	0	0	1	49	532	1.3	26.7	669	327	Flood control		3: Fair	19.664	48.5201
3803		Rakacai	Rakaca	Miskolc	Hungary		1961	64	0	0	0	0	1	12	840	1.9	5.2	1177	147	Water supply		2: Good	20.766	48.4491
3804		Ruzina	Teplicka	Lucenec	Slovakia		1973	52	0	0	0	0	1	22	271	1.8	14.8	174	261	Irrigation		3: Fair	19.5677	48.4366
3805		Kralova	Vah	Sered	Slovakia		1985	40	0	0	0	0	1	34	10480	11.7	50.8	140954	117	Hydroelectricity		3: Fair	17.8271	48.1938
3806		Hrusov	Dunaj	Bratislava	Slovakia	Hungary	1995	30	0	0	0	0	1	24	8930	40	160	2093565	123	Irrigation		3: Fair	17.2698	47.9991
3807		Rogojesti	Siret	Siret	Romania		1987	38	0	0	0	0	1	15	3482	8	55.8	17343	290	Water supply		2: Good	26.1475	47.9353
3808		Calinesti-Oas	Tur	Negresti	Romania		1974	51	0	0	0	0	1	16	798	3.8	29	4362	140	Irrigation		2: Good	23.2775	47.8978
3809		Stinca Costesti	Prut	Botosani	Romania	Moldova	1979	46	0	0	0	0	1	43	3000	77	1290	139840	84	Flood control		3: Fair	27.226	47.8413
3810		Markazi	Nyiget	Markaz	Hungary		1968	57	0	0	0	0	1	17	312	1.7	8.3	45	167	Water supply		2: Good	20.0798	47.8104
3811		Catamarasti	Sitna	Botosani	Romania		1979	46	0	0	0	0	1	15	540	2.7	17.5	1112	119	Irrigation		3: Fair	26.6301	47.7886
3812		Bucecea	Siret	Bucecea	Romania		1977	48	0	0	0	0	1	12	5682	4.8	10	20613	264	Water supply		3: Fair	26.3672	47.7817
3813		Dragomirna	Dragomirna	Suceava	Romania		1976	49	0	0	0	0	1	21	920	1.9	22.8	183	305	Water supply		2: Good	26.2313	47.6984
3814	Lake Tisza	Tisza	Tisza		Hungary		1978	47	0	0	0	0	1	26	341	127	228.6	558066	84	Flood control	Very shallow reservoir; average depth 1.3 m	2: Good	20.5192	47.4979
3815		Parcovaci	Bahlui	Harlau	Romania		1985	40	0	0	0	0	1	25	290	0.6	9.4	644	195	Water supply		2: Good	26.8215	47.4519
3816		Halceni	Miletin	Iasi	Romania		1986	39	0	0	0	0	1	10	1013	6.2	41.1	4808	46	Water supply		3: Fair	27.29	47.4159
3817		Fehervarcsurgoi	Gaja	Szekesfe herva	Hungary		1972	53	0	0	0	0	1	14	108	2.2	14.3	841	145	Flood control		3: Fair	18.2521	47.2816
3819		Podu Iloaiei	Bahluet	Podu Iloaie	Romania		1964	61	0	0	0	0	1	14	630	4.5	33	3493	59	Fisheries		3: Fair	27.2507	47.2054
3820		Varsolt	Crasna	Simleu Silvaniei	Romania		1979	46	0	0	0	0	1	17	2160	6.5	50.2	2315	234	Flood control		2: Good	22.9187	47.1885
3821		Colibita	Bistrita Ardealul	Bistrita	Romania		1993	32	0	0	0	0	1	92	250	3.1	90	1207	792	Water supply		3: Fair	24.8773	47.1641
3822		Tileagd	Crisul Repede	Oradea	Romania		1988	37	0	0	0	0	1	37	14246	6	52.9	24052	177	Water supply		2: Good	22.208	47.0773
3823		Lugasu	Crisul Repede	Alesd	Romania		1989	36	0	0	0	0	1	29	15666	6.4	65.4	23619	195	Hydroelectricity		2: Good	22.3039	47.0592
3824		Izvorul Muntelui	Bistrita	Piatra Neamt	Romania		1961	64	0	0	0	0	1	127	430	310	1230	47731	483	Hydroelectricity		2: Good	26.1073	46.9406
3825		Tungujei	Sacovat	Iasi	Romania		1987	38	0	0	0	0	1	20	750	5.6	25	1179	156	Water supply		2: Good	27.3402	46.94
3826		Piatra Neamt	Bistrita	Piatra Neamt	Romania		1963	62	0	0	0	0	1	27	920	2.4	10	56836	329	Hydroelectricity		2: Good	26.3418	46.9321
3827		Cazanesti	Durduc	Negresti	Romania		1975	50	0	0	0	0	1	15	870	0.3	21.1	1076	128	Irrigation		3: Fair	27.4899	46.8621
3828		Dragan	Dragan	Huedin	Romania		1987	38	0	0	0	0	1	120	424	2.9	112	1751	837	Hydroelectricity		2: Good	22.7134	46.7893
3829		Solesti	Vasluet	Vaslui	Romania		1974	51	0	0	0	0	1	14	964	6.7	47	2224	115	Irrigation		2: Good	27.7885	46.7905
3830		Tarnita	Somesul Cald	Cluj Napoca	Romania		1974	51	0	0	0	0	1	97	237	2.2	74	5740	533	Hydroelectricity		2: Good	23.2978	46.7262
3831		Racova	Bistrita	Buhusi	Romania		1965	60	0	0	0	0	1	20	7380	2.7	8.7	65145	204	Hydroelectricity		2: Good	26.7144	46.6937
3832		Feistritzbach	Feistritzbach	Lavamuend	Austria		1990	35	0	0	0	0	1	88	370	0.9	16.2	416	1083	Hydroelectricity		2: Good	15.0384	46.6786
3833		Fantanele	Somesul Cald	Huedin	Romania		1978	47	0	0	0	0	1	92	400	8.3	225	3862	945	Hydroelectricity		2: Good	23.0588	46.6672
3834		Vuzenica	Drava	Vuzenica	Slovenia		1952	73	0	0	0	0	1	34	191	1.8	14.2	231576	331	Hydroelectricity		3: Fair	15.1512	46.5927
3835		Vuhred	Drava	Brezno	Slovenia		1956	69	0	0	0	0	1	33	167	2.5	19.3	233633	359	Hydroelectricity		3: Fair	15.2725	46.5878
3836		Manjesti	Crasna	Vaslui	Romania		1978	47	0	0	0	0	1	14	865	5.5	40.9	1744	94	Irrigation		3: Fair	27.8406	46.5664
3837		Zeter	Tarnava Mare	Odorheiu Secuiesc	Romania		1993	32	0	0	0	0	1	48	520	2.3	44	2489	613	Flood control		3: Fair	25.401	46.4654
3838		Galbeni	Siret	Bacau	Romania		1983	42	0	0	0	0	1	24	20942	11.2	39.6	166474	136	Hydroelectricity		2: Good	26.9532	46.4569
3839		Racaciuni	Siret	Bacau	Romania		1984	41	0	0	0	0	1	29	12722	20	103.7	166296	122	Hydroelectricity		2: Good	27.048	46.336
3840		Poiana Uzului	Uz	Targu Ocna	Romania		1973	52	0	0	0	0	1	82	500	3.3	90	1871	493	Water supply		2: Good	26.3896	46.3347
3841		Dubrava	Drava	Koprivnica	Croatia		1989	36	0	0	0	0	1	24	492	16.6	93.5	264008	143	Hydroelectricity		2: Good	16.7218	46.3239
3842		Cakovec	Drava	Cakovec	Croatia		1982	43	0	0	0	0	1	24	334	10.5	51	261803	158	Hydroelectricity		2: Good	16.4682	46.3076
3843		Beresti	Siret	Sascut	Romania		1985	40	0	0	0	0	1	29	14322	18	120	167636	101	Hydroelectricity		2: Good	27.1855	46.1867
3845		Voila	Olt	Fagaras	Romania		1988	37	0	0	0	0	1	21	11961	4.2	12.3	65443	417	Hydroelectricity		2: Good	24.8607	45.8347
3846		Vistea	Olt	Fagaras	Romania		1989	36	0	0	0	0	1	20	7093	1.7	4.3	70085	407	Hydroelectricity		2: Good	24.7497	45.8086
3847		Arpasu	Olt	Fagaras	Romania		1990	35	0	0	0	0	1	20	10093	2.5	7.3	73741	399	Hydroelectricity		2: Good	24.5947	45.7926
3848		Scoreiu	Olt	Fagaras	Romania		1992	33	0	0	0	0	1	22	5593	2.1	5.2	77663	388	Hydroelectricity		2: Good	24.5147	45.7772
3849		Avrig	Olt	Avrig	Romania		1996	29	0	0	0	0	1	23	20060	3.3	10.8	79670	378	Hydroelectricity		2: Good	24.3905	45.7441
3850		Gura Raului	Cibin	Sibiu	Romania		1980	45	0	0	0	0	1	74	330	0.7	15.5	1415	636	Water supply		3: Fair	23.9257	45.7139
3851		Cincis	Cerna	Hunedoara	Romania		1964	61	0	0	0	0	1	48	220	2.6	43	1865	293	Water supply		2: Good	22.8762	45.7004
3852		Hateg	Raul Mare	Hateg	Romania		1989	36	0	0	0	0	1	32	3769	1.2	12.5	3859	321	Hydroelectricity		2: Good	22.9596	45.5901
3853		Oasa	Sebes	Sebes	Romania		1979	46	0	0	0	0	1	91	300	4	136	1584	1272	Hydroelectricity		3: Fair	23.6257	45.5865
3854		Sacele	Tarlung	Brasov	Romania		1975	50	0	0	0	0	1	45	709	1.5	15	2386	730	Water supply		3: Fair	25.7657	45.5807
3855		Siriu	Buzau	Nehoiu	Romania		1994	31	0	0	0	0	1	122	570	4.2	155	8824	534	Flood control		3: Fair	26.2517	45.4938
3856		Vidra	Lotru	Brezoi	Romania		1973	52	0	0	0	0	1	121	350	12.4	340	1349	1266	Hydroelectricity		2: Good	23.7672	45.4465
3858		Vidraru	Arges	Curtea de Arges	Romania		1965	60	0	0	0	0	1	166	305	10	469	2702	813	Hydroelectricity		2: Good	24.6313	45.3696
3860		Maneciu	Teleajen	Maneciu	Romania		1994	31	0	0	0	0	1	75	750	1.9	60	4063	584	Water supply		3: Fair	25.9891	45.3321
3861		Paltinu	Doftana	Campina	Romania		1971	54	0	0	0	0	1	108	460	2	53.7	6266	630	Water supply		2: Good	25.7365	45.2485
3862		Daesti	Olt	Ramnicu Valce	Romania		1976	49	0	0	0	0	1	29	2918	2.5	11.2	121337	252	Hydroelectricity		2: Good	24.3695	45.1789
3863	Ivanu	Cerna Principal	Cerna	Baile Herculane	Romania		1980	45	0	0	0	0	1	110	342	3	124	999	640	Water supply		3: Fair	22.7327	45.1623
3864		Ramnicu Valcea	Olt	Ramnicu Valce	Romania		1974	51	0	0	0	0	1	34	2530	3.2	19	122191	236	Hydroelectricity		2: Good	24.3753	45.1205
3865		Zigoneni	Arges	Pitesti	Romania		1973	52	0	0	0	0	1	29	2850	1.6	13.3	5653	379	Hydroelectricity		2: Good	24.6642	45.0815
3866		Calimanesti	Olt	Calimanesti	Romania		1981	44	0	0	0	0	1	29	8138	0.9	4.6	125037	225	Hydroelectricity		3: Fair	24.3656	45.0729
3867		Vadeni	Jiu	Targu Jiu	Romania		1989	36	0	0	0	0	1	25	3559	1	4.8	9705	206	Hydroelectricity		2: Good	23.2684	45.0579
3868		Govora	Olt	Ramnicu Valce	Romania		1975	50	0	0	0	0	1	26	3837	4.8	18.5	125931	207	Hydroelectricity		2: Good	24.2983	45.011
3869		Valcele	Arges	Curtea de Arge	Romania		1975	50	0	0	0	0	1	35	5696	6.4	54.8	6353	324	Water supply		2: Good	24.7437	44.9813
3870		Herculane	Cerna	Baile Herculane	Romania		1986	39	0	0	0	0	1	58	190	0.8	15.8	3287	244	Hydroelectricity		2: Good	22.4521	44.9328
3871		Babeni	Olt	Govora	Romania		1978	47	0	0	0	0	1	33	19808	9.1	59.7	134832	189	Hydroelectricity		3: Fair	24.2506	44.9201
3872		Budeasa	Arges	Pitesti	Romania		1978	47	0	0	0	0	1	33	5615	6.4	54.9	9486	292	Water supply		2: Good	24.824	44.9151
3873		Ionesti	Olt	Govora	Romania		1978	47	0	0	0	0	1	34	14638	4.7	24.9	137657	177	Hydroelectricity		3: Fair	24.2476	44.8567
3874		Pitesti	Arges	Pitesti	Romania		1971	54	0	0	0	0	1	20	6521	1.4	4.5	26109	260	Water supply		2: Good	24.902	44.8466
3875		Golesti	Arges	Pitesti	Romania		1983	42	0	0	0	0	1	32	7866	6.8	78.5	25993	242	Water supply		2: Good	24.9961	44.8128
3877		Zavideni	Olt	Dragasani	Romania		1979	46	0	0	0	0	1	30	16838	8.4	50	138719	162	Hydroelectricity		3: Fair	24.2719	44.774
3878	Kruscica	Sklope	Lika	Gospic	Croatia		1967	58	0	0	0	0	1	81	218	8.6	142	36738	556	Hydroelectricity		3: Fair	15.2682	44.6883
3879		Dragasani	Olt	Dragasani	Romania		1980	45	0	0	0	0	1	32	18638	7.8	40	140460	144	Hydroelectricity		3: Fair	24.2948	44.6823
3880		Iron Gate 1	Danube	Drobeta Turnu Severin	Romania	Serbia	2007	18	0	0	0	0	0	60	1278	107	2100	5506185	59	Hydroelectricity	Very large hydropower station (installed capacity 2200 MW) at border of Romania and Serbia; alternative administrative unit: Serbia Borski	2: Good	22.5309	44.6733
3881		Zavoiu Orbului	Arges	Gaesti	Romania		1988	37	0	0	0	0	1	20	7553	2.8	16.1	29274	169	Irrigation		3: Fair	25.3837	44.6615
3883		Strejesti	Olt	Slatina	Romania		1978	47	0	0	0	0	1	33	24461	22	225	143262	130	Hydroelectricity		3: Fair	24.3271	44.5359
3885		Arcesti	Olt	Slatina	Romania		1980	45	0	0	0	0	1	31	18918	8.4	43.4	145734	114	Hydroelectricity		3: Fair	24.3132	44.4494
3886		Slatina	Olt	Slatina	Romania		1980	45	0	0	0	0	1	26	17858	5.8	19.2	145985	105	Hydroelectricity		3: Fair	24.3556	44.4062
3887		Gurbanesti	Mostistea	Lehliu	Romania		1985	40	0	0	0	0	1	20	840	9	55.8	5671	32	Irrigation		2: Good	26.6894	44.3939
3889		Mihailesti	Arges	Bucharest	Romania		1995	30	0	0	0	0	1	18	-99	-99	68	40071	77	Hydroelectricity		2: Good	25.9422	44.3335
3890		Frasinet	Mostistea	Lehliu	Romania		1983	42	0	0	0	0	1	22	580	29	142	9122	20	Irrigation		2: Good	26.8177	44.3242
3891		Iron Gate 2	Danube	Prahovo	Romania	Serbia	1984	41	0	0	0	0	1	54	963	52	868	5526724	36	Hydroelectricity	Large hydropower station (installed capacity 590 MW) at border of Romania and Serbia; alternative administrative unit: Serbia Borski; alternative dam length: 412 m	2: Good	22.5672	44.3077
3892	Ricice Reservoir	Stikada	Ricice	Gracac	Croatia		1983	42	0	0	0	0	1	14	5510	3.3	18.4	9615	548	Hydroelectricity		2: Good	15.8104	44.2979
3893		Facau	Ilfovat	Bucuresti	Romania		1983	42	0	0	0	0	1	13	1372	3	10.4	529	76	Irrigation		3: Fair	25.8357	44.2954
3894		Ipotesti	Olt	Slatina	Romania		1986	39	0	0	0	0	1	31	30256	16.9	110	147685	90	Hydroelectricity		3: Fair	24.4017	44.2651
3895		Iezer	Mostistea	Calarasi	Romania		1975	50	0	0	0	0	1	11	2450	29	267	11279	13	Irrigation		2: Good	26.9309	44.2237
3896		Draganesti	Olt	Draganesti Olt	Romania		1988	37	0	0	0	0	1	34	27656	10	76	162902	74	Hydroelectricity		3: Fair	24.4843	44.1762
3897		Frunzaru	Olt	Caracal	Romania		1989	36	0	0	0	0	1	30	31556	13	96	166750	63	Hydroelectricity		3: Fair	24.5728	44.0438
3899		Rusanesti	Olt	Caracal	Romania		1990	35	0	0	0	0	1	29	31156	11	78	168077	50	Hydroelectricity		3: Fair	24.6271	43.9197
3900		Kula	Topolovetz	Kula	Bulgaria		1967	58	0	0	0	0	1	32	342	1.5	20.4	178	196	Irrigation		2: Good	22.5263	43.9143
3904		Poletkovtzi	Selska bara	Kula	Bulgaria		1971	54	0	0	0	0	1	35	312	1.6	17.5	230	198	Irrigation		2: Good	22.5137	43.8545
3906		Izbiceni	Olt	Turnu Magurele	Romania		1996	29	0	0	0	0	1	29	27636	10.9	74	169825	34	Hydroelectricity		3: Fair	24.6967	43.8148
3908		Peruca	Cetina	Sinj	Croatia		1958	67	0	0	0	0	1	67	467	20.1	565.3	8995	347	Hydroelectricity		2: Good	16.5937	43.7982
3911		Rabisha	Rabisha	Dimovo	Bulgaria		1963	62	0	0	0	0	1	13	380	3.2	43.2	6	286	Irrigation		3: Fair	22.5854	43.7433
3913		Drenovetz	Medovnishka	Drenovetz	Bulgaria		1963	62	0	0	0	0	1	28	373	1.1	12	194	177	Irrigation		2: Good	22.9141	43.6946
3917	Zeleno Jezero	Ricice	Ricice	Imotski	Croatia		1985	40	0	0	0	0	1	45	206	2	35.2	9253	388	Flood control		2: Good	17.1334	43.4957
3919		Baniska	Shipa	Borovo	Bulgaria		1976	49	0	0	0	0	1	20	231	1.5	10.5	1678	165	Irrigation		2: Good	25.8884	43.4271
3922		Beli Lom	Beli Lom	Loznitza	Bulgaria		1963	62	0	0	0	0	1	21	550	3.5	25.5	388	280	Irrigation		2: Good	26.6728	43.4045
3923		Ogosta	Ogosta	Montana	Bulgaria		1986	39	0	0	0	0	1	59	1460	25.3	506	4568	171	Irrigation		2: Good	23.2128	43.3966
3924		Gorni Dabnik	Gornodabnishka Bara	Pelovo	Bulgaria		1982	43	0	0	0	0	1	37	1991	11.8	130	303	168	Irrigation		3: Fair	24.3312	43.3687
3925		Saedinenie	Anna Dere	Loznitza	Bulgaria		1962	63	0	0	0	0	1	17	320	2.5	12.8	765	168	Irrigation		2: Good	26.5969	43.3243
3926		Telish	Gornodabnishka Bara	Pelovo	Bulgaria		1969	56	0	0	0	0	1	29	1960	2.3	17.2	58	197	Irrigation		3: Fair	24.2465	43.3171
3929		Yastrebino	Goliama	Omurtag	Bulgaria		1974	51	0	0	0	0	1	41	420	4.8	62.3	970	333	Irrigation		2: Good	26.2739	43.1526
3930		Alexendre Stamboliiski	Rossitza	Pavlikeni	Bulgaria		1953	72	0	0	0	0	1	66	300	10.9	220	9141	189	Hydroelectricity		2: Good	25.1729	43.1215
3931		Ticha	Gol Kamchia	Preslav	Bulgaria		1973	52	0	0	0	0	1	55	398	18.7	311.8	5604	186	Irrigation		2: Good	26.7973	43.0885
3933		Tzonevo	Luda Kamchia	Dalgopol	Bulgaria		1974	51	0	0	0	0	1	39	860	17.3	329	9300	49	Irrigation		2: Good	27.4104	43.0267
3934		Sopot	Kalnik	Teteven	Bulgaria		1961	64	0	0	0	0	1	28	490	5.3	59	442	355	Irrigation		2: Good	24.4271	43.0063
3935		Eleshnitza	Eleshnitza	Dalgopol	Bulgaria		1967	58	0	0	0	0	1	26	185	1.3	10.6	883	79	Irrigation		2: Good	27.4647	43.0008
3936		Yovkovtzi	Veselina	Elena	Bulgaria		1979	46	0	0	0	0	1	66	256	5.9	92	1060	332	Water supply		3: Fair	25.7627	42.9462
3938		Kamchia	Luda Kamchia	Karnobat	Bulgaria		1974	51	0	0	0	0	1	80	835	9.6	228.5	4184	251	Water supply		2: Good	26.9177	42.8808
3941		Hristo Smirnenski	Panicharska	Gabrovo	Bulgaria		1966	59	0	0	0	0	1	56	218	1.1	18.7	307	493	Water supply		2: Good	25.2671	42.8168
3946		Poroy	Hadjiiska	Nesebar	Bulgaria		1972	53	0	0	0	0	1	29	604	4.5	45.2	1313	30	Irrigation		2: Good	27.6217	42.7193
3947		Aheloy	Aheloy	Nesebar	Bulgaria		1969	56	0	0	0	0	1	43	242	0.9	12.7	363	116	Irrigation		2: Good	27.5169	42.7128
3948		Dushantzi	Topolnitza	Koprivtchitza	Bulgaria		1972	53	0	0	0	0	1	43	200	-99	11.6	850	787	Water supply		2: Good	24.2868	42.698
3950		Ognianovo	Lesnovska	Elin Pelin	Bulgaria		1994	31	0	0	0	0	1	51	1070	2.1	36	883	619	Water supply		2: Good	23.7451	42.6178
3951		Koprinka	Toundja	Kazanlak	Bulgaria		1955	70	0	0	0	0	1	44	834	11.2	112	4927	387	Hydroelectricity		2: Good	25.3186	42.6147
3952		Jrebchevo	Tundja	Nikolaevo	Bulgaria		1970	55	0	0	0	0	1	53	794	25.8	400	12032	253	Irrigation		2: Good	25.9506	42.5924
3953		Domlian	Svejenska	Kalofer	Bulgaria		1966	59	0	0	0	0	1	41	743	1.6	27	608	351	Irrigation		2: Good	24.9228	42.5442
3954		Studena	Struma	Pernik	Bulgaria		1953	72	0	0	0	0	1	53	268	-99	20.6	828	839	Water supply		2: Good	23.1441	42.5345
3955		Iskar	Iskar	Sofia	Bulgaria		1956	69	0	0	0	0	1	74	204	30	673	9131	851	Water supply		3: Fair	23.538	42.5131
3956		Lobosh	Struma	Pernik	Bulgaria		1975	50	0	0	0	0	1	24	627	5.4	54.8	10890	622	Water supply		2: Good	22.8354	42.5068
3958		Topolnitza	Topolnitza	Ihtiman	Bulgaria		1963	62	0	0	0	0	1	78	338	5.6	141.3	8425	392	Irrigation		2: Good	24.0026	42.4199
3959		Piasachnik	Piasachnik	Saedinenie	Bulgaria		1982	43	0	0	0	0	1	42	3010	15.8	211.4	2211	287	Irrigation		2: Good	24.5688	42.3981
3960	Ovtcharitza Reservoir	Ovtcharitza	Ovtcharitza	Radnevo	Bulgaria		1967	58	0	0	0	0	1	22	1480	-99	45	591	136	Hydroelectricity	Reservoir has four subsections, separated by individual dams: Ovtcharitza, Byal Kadenets, Skender Dere, Ovtchi Kladenets	3: Fair	26.1445	42.2558
3961		Yasna Poliana	Dudinska	Primorsko	Bulgaria		1974	51	0	0	0	0	1	48	500	2.3	34.8	265	79	Water supply		2: Good	27.5918	42.2543
3963		Kirilovo	Koun bunar	Kirilovo	Bulgaria		1975	50	0	0	0	0	1	19	892	2.1	12.6	159	131	Irrigation		2: Good	26.6319	42.214
3964		Belmeken	Kriva	Velingrad	Bulgaria		1979	46	0	0	0	0	1	98	537	4.6	144	134	1896	Hydroelectricity	Two dams?	3: Fair	23.8103	42.1725
3965		Rozov Kladenetz	Sokolitza	Galabovo	Bulgaria		1960	65	0	0	0	0	1	12	1285	3.6	20.4	857	107	Hydroelectricity		3: Fair	25.8906	42.1507
3966		Malko Sharkovo	Popovska	Boliarovo	Bulgaria		1966	59	0	0	0	0	1	41	1176	3.8	50	754	239	Irrigation		2: Good	26.8565	42.1186
3969		Batak	Matnitza	Batak	Bulgaria		1959	66	0	0	0	0	1	35	273	21.4	305.8	325	1104	Hydroelectricity	Two dams for this reservoir	3: Fair	24.2018	42.0185
3970		Garvanovo	Chitachka	Haskovo	Bulgaria		1985	40	0	0	0	0	1	41	745	2.8	25	66	220	Irrigation		2: Good	25.4271	41.9854
3972		Antonivanovtzi	Vacha	Krichim	Bulgaria		1975	50	0	0	0	0	1	145	420	5	226	5235	544	Hydroelectricity		2: Good	24.4434	41.9343
3973		Dositeevo	Dositeevska	Harmanli	Bulgaria		1988	37	0	0	0	0	1	30	201	1	9	182	149	Irrigation		2: Good	26.0154	41.9299
3976		Trakietz	Olu dere	Haskovo	Bulgaria		1966	59	0	0	0	0	1	44	1020	9.2	114	1282	225	Irrigation		2: Good	25.434	41.8632
3983		Dosspat	Dosspatzka	Dosspat	Bulgaria		1969	56	0	0	0	0	1	61	230	22.1	449.3	1241	1215	Hydroelectricity		2: Good	24.153	41.6476
3984		Kardgali	Arda	Kurdzhali	Bulgaria		1976	49	0	0	0	0	1	104	403	16.1	532.9	10906	326	Hydroelectricity		3: Fair	25.3383	41.6305
3985		Studen Kladenetz	Arda	Krumovgrad	Bulgaria		1957	68	0	0	0	0	1	68	338	25.6	489	24075	227	Hydroelectricity		2: Good	25.6385	41.6197
3986		Ivailovgrad	Arda	Ivailovgrad	Bulgaria		1964	61	0	0	0	0	1	73	250	15.1	188	34919	133	Hydroelectricity		2: Good	26.1078	41.5861
3991		Thissavros	Nestos	Drama	Greece		1996	29	0	0	0	0	1	170	480	-99	705	27131	363	Hydroelectricity		3: Fair	24.3645	41.3521
3992		Platanovryssi	Nestos	Drama	Greece		1997	28	0	0	0	0	1	95	270	3	73	29817	233	Hydroelectricity		2: Good	24.462	41.3374
4002		Conza	Ofanto	Avellino	Italy		1992	33	0	0	0	0	1	47	880	4.8	77.4	3002	429			2: Good	15.3227	40.877
4003		Serra del Corvo	Basentello	Potenza	Italy		1974	51	0	0	0	0	1	32	1015	3.5	41	1914	262	Irrigation		2: Good	16.2395	40.8441
4005		San Giuliano	Bradano	Matera	Italy		1956	69	0	0	0	0	1	79	314	-99	107	11817	101	Irrigation		2: Good	16.5385	40.6052
4007		Assomata	Aliakmon	Veria	Greece		1985	40	0	0	0	0	1	52	205	2.4	53	53406	86	Hydroelectricity		3: Fair	22.243	40.473
4008		Sfikia	Aliakmon	Veria	Greece		1985	40	0	0	0	0	1	82	220	4.2	99	53514	151	Hydroelectricity		2: Good	22.1908	40.3933
4009	Voivis	Polyphyto	Aliakmon Polyphyto	Kozani	Greece		1974	51	0	0	0	0	1	112	296	100	2244	53258	289	Hydroelectricity		3: Fair	22.1005	40.3009
4012		Monte Cotugno	Sinni	Potenza	Italy		1982	43	0	0	0	0	1	70	1850	18.5	530	9865	226	Irrigation		3: Fair	16.352	40.177
4016	Ioannina	Pigae Aoos	Aoos	Ioannina	Greece		1990	35	0	0	0	0	1	78	300	11.5	260	3100	469	Hydroelectricity	Multiple dams might act as lake control (intakes for drainage canals) rather than a new reservoir; lake also called 'Pamvotis'	3: Fair	20.8412	39.6877
4018		Cecita	Mucone	Cosenza	Italy		1951	74	0	0	0	0	1	55	166	10.4	107.2	2084	1142	Hydroelectricity		3: Fair	16.5395	39.3967
4021	Limni Plastiras	Plastiras	Tavropos	Karditsa	Greece		1959	66	0	0	0	0	1	83	220	25.2	400	2033	826	Hydroelectricity		2: Good	21.7456	39.2371
4022		Pournari	Arachthos	Arta	Greece		1981	44	0	0	0	0	1	107	580	21	730	36160	112	Hydroelectricity		3: Fair	21.0277	39.1858
4024		Smokovo	Sofaditis	Karditsa	Greece		1994	31	0	0	0	0	1	104	480	-99	200	3188	360	Irrigation		2: Good	22.0646	39.1462
4025		Passante	Passante	Catanzaro	Italy		1976	49	0	0	0	0	1	71	450	1.9	40.3	454	1105	Hydroelectricity		2: Good	16.5229	39.0934
4026		Kremasta	Acheloos	Agrinio	Greece		1965	60	0	0	0	0	1	160	456	80.6	4500	56912	267	Hydroelectricity		3: Fair	21.4982	38.8887
4028		Kastraki	Acheloos	Agrinion	Greece		1969	56	0	0	0	0	1	96	547	28	785	68207	95	Hydroelectricity		3: Fair	21.3661	38.7412
4029		Stratos	Acheloos	Agrinio	Greece		1988	37	0	0	0	0	1	26	1900	-99	80	69511	61	Hydroelectricity		2: Good	21.327	38.6781
4030		Evinos	Evinos	Nafpaktos	Greece		1998	27	0	0	0	0	1	124	640	-99	113	3665	450	Water supply		3: Fair	21.837	38.6688
4032		Mornos	Mornos	Lidhorikio	Greece		1976	49	0	0	0	0	1	125	815	-99	780	5113	430	Water supply		3: Fair	22.1231	38.5273
4033		Marathon	Haradros	Athena	Greece		1931	94	0	0	1	0	0	63	285	-99	41	526	199	Water supply		2: Good	23.9046	38.1663
4036		Pinios Ilias	Pinios Ilias	Amalias	Greece		1968	57	0	0	0	0	1	53	2100	-99	420	6108	75	Irrigation		3: Fair	21.445	37.907
4037		Ladhon	Ladhon	Patra	Greece		1955	70	0	0	0	0	1	58	101	-99	49	12526	431	Hydroelectricity		3: Fair	21.9829	37.7648
4040		Bramianos	Bramianos	Lerapetra	Greece		1986	39	0	0	0	0	1	63	660	-99	15	232	59			2: Good	25.699	35.0363
4354	Pielinen	Kaltimo	Pielisjoki	Joensuu	Finland		1958	67	0	0	0	0	1	30	1600	894.2	2000	149492	80	Hydroelectricity		3: Fair	30.1773	62.8037
4355	Koitere	Pamilo	Koitajoki	Joensuu	Finland		1955	70	0	0	0	0	1	19	6570	200	900	22523	147	Hydroelectricity	The main reservoir (Lake Koitere) is further upstream; there is also a second dam (Heinajoki) a little upstream	2: Good	30.5293	62.808
4465		Evretou	Stavros tis Psokas	Polis	Cyprus		1986	39	0	0	0	0	1	70	260	1.3	25	564	165			3: Fair	32.4715	34.9729
4466		Yermasoyia	Yermasoyia	Limassol	Cyprus		1968	57	0	0	0	0	1	49	294	1.1	13.6	1097	75			3: Fair	33.0867	34.7452
4467		Asprokremmos	Xeropotamos	Paphos	Cyprus		1982	43	0	0	0	0	1	56	700	2.6	51	1773	60			3: Fair	32.5564	34.7281
4468		Kouris	Kouris	Limassol	Cyprus		1988	37	0	0	0	0	1	113	550	3.6	115	2260	228			2: Good	32.9198	34.7284
6817		La Rance	Rance	Dinard	France		1966	59	0	0	0	0	1	27	720	22	184	16869	0	Hydroelectricity	Dam for tide control; connects to North Sea; not an ordinary reservoir	3: Fair	-1.96875	48.5396
6818		Lauwerszee	Lauwersmeer	Zoutkamp	Netherlands		1969	56	0	0	0	0	1	23	13000	25	50	28576	0	Flood control	Dam for tide control; connects to North Sea; not an ordinary reservoir	3: Fair	6.17955	53.4126
6819	Ijsselmeer	Afsluitdijk	Zuiderzee	Den Oever	Netherlands		1932	93	0	0	1	0	0	19	32000	1200	5120	144890	0	Flood control	Dam for tide control; connects to North Sea; not an ordinary reservoir	3: Fair	5.64792	52.6146
6820		Brielse Gat	Oostvoornse Meer	Brielle	Netherlands		1967	58	0	0	0	0	1	10	2000	2.3	47	84	-1	Flood control	Dam for tide control; connects to North Sea; not an ordinary reservoir	3: Fair	4.08128	51.9309
6821		Haringvliet Dam	Haringvliet	Hellevoetsluis	Netherlands		1970	55	0	0	0	0	1	24	5500	79.7	550	1108	0	Flood control	Dam for tide control; connects to North Sea; not an ordinary reservoir	3: Fair	4.13958	51.8214
6822		Brouwersdam	Brouwershavensche Gat	Brouwershaven	Netherlands		1972	53	0	0	0	0	1	36	6200	113	570	448	-1	Flood control	Dam for tide control; connects to North Sea; not an ordinary reservoir	3: Fair	4.13958	51.7009
6823		Ooster Scheldekering	Oosterschelde	Zierikzee	Netherlands		1986	39	0	0	0	0	1	50	9000	350	2780	387	0	Flood control	Dam for tide control; connects to North Sea; not an ordinary reservoir	3: Fair	3.90104	51.6304
6824		Veersedam	Veerse Meer	Veere	Netherlands		1961	64	0	0	0	0	1	27	2800	21.7	107	806	0	Flood control	Dam for tide control; connects to North Sea; not an ordinary reservoir; two dams for this reservoir; Veersedam to the west and Zandkreek to the east	3: Fair	3.80938	51.5483
6832		Vanttauskoski	Kemijoki		Finland		1971	54	0	0	0	0	1	-99	-99	-99	45	318096	111		River barrage; no proper reservoir	3: Fair	26.6896	66.3688
6834		Aschach	Danube	Eferding	Austria		1964	61	0	0	0	0	1	34	398	9.5	114	1412067	270	Hydroelectricity	River barrage (run-of-river dam); no proper reservoir	3: Fair	14.0271	48.3813
6835		Altenwoerth	Danube	Tulln	Austria		1976	49	0	0	0	0	1	37	457	11	93	1899121	183	Hydroelectricity	River barrage (run-of-river dam); no proper reservoir	3: Fair	15.8604	48.3771
6836		Greifenstein	Danube	Stockerau	Austria		1984	41	0	0	0	0	1	31	455	10	87	1930805	172	Hydroelectricity	River barrage (run-of-river dam); no proper reservoir	3: Fair	16.2437	48.3521
6837		Ybbs-Persenbeug	Danube	Ybbs	Austria		1959	66	0	0	0	0	1	32	460	10	74	1746129	218	Hydroelectricity	River barrage (run-of-river dam); no proper reservoir	3: Fair	15.0771	48.1854
6841		Vallabregues	Rhone	Avignon	France		1971	54	0	0	0	0	1	26	212	12	70	1724498	11	Hydroelectricity	River barrage (run-of-river dam); no proper reservoir	3: Fair	4.62708	43.8438
6945		Ilarion	Aliakmonas	Eani	Greece		2012	13	0	0	0	0	0	130	540	18	520	50407	340	Hydroelectricity		2: Good	21.7995	40.0944
6946	HÃ¡lslÃ³n Reservoir	Karahnjukar	JÃ¶kulsÃ¡ Ã¡ Dal	EgilsstaÃ°ir	Iceland		2006	19	0	0	0	0	0	198	696	57	2100	50384	574	Hydroelectricity		2: Good	-15.7944	64.9467
7042		Baixo Sabor	Sabor River	Torre de Moncorvo	Portugal		2013	12	0	0	0	0	0	123	505	28.2	1095	34067	148	Hydroelectricity	part of cascade	2: Good	-7.0111	41.2306
7043		Odelouca	Odelouca	Monchique	Portugal		2009	16	0	0	0	0	0	76	415	7.8	157	5940	87	Water supply		2: Good	-8.46896	37.2874
7044		Pedrogao	Guadiana	Vidigueira	Portugal		2006	19	0	0	0	0	0	43	448	11	106	165005	66	Hydroelectricity		2: Good	-7.63005	38.1104
7052		Andevalo	Malagon	Puebla de Guzman	Spain		2003	22	0	0	0	0	0	70	1830	36.3	600	4547	65	Other		2: Good	-7.39914	37.6257
7053		Arenoso	Arenoso	Montoro	Spain		2007	18	0	0	0	0	0	78	1286	7.6	161	937	161	Irrigation		2: Good	-4.4403	38.022
7054		La Brena II	Guadiato	Almodovar del Rio	Spain		2008	17	0	0	0	0	0	125	668	19.8	823	4067	95	Hydroelectricity	Replaced La Brena in 2008 (GRanD v1.1 ID 2882)	2: Good	-5.04393	37.8276
7056		Los Melonares	Viar	Castilblanco de los Arroyos	Spain		2007	18	0	0	0	0	0	50	525	14.6	186	7586	60	Water supply		2: Good	-5.88171	37.7236
7057		Montoro III	Montoro	Mestanza	Spain		2007	18	0	0	0	0	0	60	308	5.4	102	1100	572	Water supply	Replaced Montoro dam (GRanD v1.1 ID 2844)	3: Fair	-4.09875	38.5271
7059		San Salvador	Arroyo de la Clamor	Albalate de Cinca	Spain		2013	12	0	0	0	0	0	51	683	10.5	124	163	259	Irrigation		3: Fair	0.181559	41.7735
7060		Villalba de los Barros	Guadajira	Villalba de los Barros	Spain		2011	14	0	0	0	0	0	46	484	9.7	106	1573	316	Irrigation		2: Good	-6.50631	38.5803

## Sheet: analysis
Number of dams past/approaching their end of life	n	%
Dams past end of life (2025)	59	5.15284
Dams past end of life by 2030	23	2.00873
Dams past end of life by 2040	69	6.0262
Dams past end of life by 2050	52	4.54148
Dams past end of life by 2100	922	80.524
Remaining	20	1.74672
N tot dams in dataset	1145	100
Check	1145
Distribution per country	Past end life (2025)		End life by 2030		End life by 2040		End life by 2050		End life by 2100		Remaining
Country name	n	%	n	%	n	%	n	%	n	%	n	%	TOT
Belgium	0	0	0	0	1	20	1	20	3	60	0	0	5	100
Bulgaria	0	0	0	0	0	0	0	0	46	100	0	0	46	100
Czechia	0	0	0	0	4	11.4286	0	0	31	88.5714	0	0	35	100
Denmark	0	0	0	0	0	0	0	0	0	0	0	0	0	0
Ireland	0	0	1	33.3333	1	33.3333	0	0	1	33.3333	0	0	3	100
France	6	5.30973	5	4.42478	12	10.6195	13	11.5044	77	68.1416	0	0	113	100
Cyprus	0	0	0	0	0	0	0	0	4	100	0	0	4	100
Luxembourg	0	0	0	0	0	0	0	0	1	100	0	0	1	100
Austria	0	0	0	0	0	0	0	0	21	100	0	0	21	100
Romania	0	0	0	0	0	0	0	0	74	98.6667	1	1.33333	75	100
Finland	0	0	0	0	0	0	3	15.7895	16	84.2105	0	0	19	100
Germany	7	11.6667	3	5	9	15	1	1.66667	40	66.6667	0	0	60	100
Greece	0	0	0	0	1	5.26316	0	0	17	89.4737	1	5.26316	19	100
Croatia	0	0	0	0	0	0	0	0	8	100	0	0	8	100
Latvia	0	0	0	0	0	0	1	33.3333	2	66.6667	0	0	3	100
Malta	0	0	0	0	0	0	0	0	0	0	0	0	0	0
Hungary	0	0	0	0	0	0	0	0	4	100	0	0	4	100
Poland	3	10.7143	0	0	3	10.7143	1	3.57143	20	71.4286	1	3.57143	28	100
Slovenia	0	0	0	0	0	0	0	0	2	100	0	0	2	100
Sweden	3	6.52174	0	0	2	4.34783	3	6.52174	37	80.4348	1	2.17391	46	100
Estonia	0	0	0	0	0	0	0	0	0	0	0	0	0	0
Spain	15	6.07287	7	2.83401	12	4.8583	10	4.04858	194	78.5425	9	3.64372	247	100
Italy	2	2.43902	4	4.87805	7	8.53659	6	7.31707	63	76.8293	0	0	82	100
Lithuania	0	0	0	0	0	0	0	0	2	100	0	0	2	100
Netherlands	0	0	0	0	1	12.5	0	0	7	87.5	0	0	8	100
Portugal	0	0	0	0	1	1.81818	4	7.27273	46	83.6364	4	7.27273	55	100
Slovakia	0	0	0	0	0	0	0	0	16	100	0	0	16	100
Iceland	0	0	0	0	0	0	0	0	5	71.4286	2	28.5714	7	100
Lichtenstein	0	0	0	0	0	0	0	0	0	0	0	0	0	0
Norway	5	4.42478	1	0.884956	2	1.76991	3	2.65487	101	89.3805	1	0.884956	113	100
Switzerland	3	8.10811	1	2.7027	2	5.40541	4	10.8108	27	72.973	0	0	37	100
UK	15	17.4419	1	1.16279	11	12.7907	2	2.32558	57	66.2791	0	0	86	100
Tot (for check)	59		23		69		52		922		20		1145
													1145

## Sheet: Legend and notes
Legend for abbreviations in dataset (from original dataset)
Abbreviation	Explanation	Notes for data analysis
res_name	name of empounded water body (hidden)
near_city	nearest city (hidden)
river	name of empunded river (hidden)
year	year in which the dam was built (not further specified: year of construction; year of completion; year of commissioning; year of refurbishment/update; etc.)
alt_year	alternative year of construction (not further specified: could be multi-year construction phase, update, secondary dam construction)	dams with neither year nor alt_year where removed from the list; when alt year was after year, the alt_year was used as the construction date of the dam, as it was assumed that that was the end date of construction. The cells were this was done are highlighted in light blue. when de difference between alt_year and year was more than 5 years, it was double-checked whether this was indeed indicatin…
rem_year	year in which dam was removed, replaced, subsumed, or destroyed	all dams with this column filled in where removed from the list
dam_height_m	dam height in m
dam_len_m	dam length in m
area_rep	most reliable reported surface area of reservoir in square kilometers	out of all area columns kept only this one as it was indicated as the most reliable
elev_masl	value derived from EarthEnv_x0002_DEM90 data set (Robinson et al. 2014) at 15s resolution at point location of dam
dis_avg_ls	long-term (1971-2000) average discharge at dam location in liters per second; value derived from HydroSHEDS flow routing scheme combined with WaterGAP runoff estimates (Döll et al. 2003) at 15s resolution at point location of dam
main_use	main purpose of reservoir, options are: irrigation, hydroelectricity,water supply, flood control, recreation, navigation, fisheries, pollution control,livestock, other
timeline	indicates whether the status of a dam has changed or will change in time, options are:
Timeline: destroyed	dam got destroyed or failed	(removed from the list as does not exist anymore)
Timeline: modified	dam was modified from an earlier status (raised, expanded, refurbished)
Timeline: planned	dam is planned to be built in the future	(removed from the list as dam is not yet finished)
Timeline: removed	dam record and point are retained but the dam itself has been removed and not replaced	(removed from the list as dam does not exist in this form anymore)
Timeline: replaced	dam record and point are retained in data set but the dam itself has been replaced, the new dam is recorded as new dam in the list	(removed from the list as dam does not exist in this form anymore)
Timeline: subsumed	dam record and point are retained but dam and reservoir themselves were subsumed by larger infrastructure constructed further downstream, old reservoir polygon has been removed and the new dam and reservoir are recorded as a new dam in the list	(removed from the list sa dam does not exist in this form anymore)
Timeline: under construction	dam is currently under construction	(removed from the list as dam not yet finished)
quality	quality index: 1 verified (location and data have been verified), 2 good (location and data seem good but have not been verified), 3 fair (some data discrepancies, missing data or uncertainties), 4 poor (significant data discrepancies of various kinds that indicate errors), 5 unreliable (severe data discrepancies without reasonable explanation)	dams with poor and unreliable quality were removed from the list
		n 3150 (Solbergfoss) was removed from the list because there are two dams at this location (Solbergfoss I and II) with very ddifferent construction dates (1924 vs 1985) and capacities, and it was not possible to determine which one the included data referred to
Full dataset included 1357 dams from the countries in the study area (EU +Schengen + UK), after deleting those dams for the reasons indicated above 1145 dams were left
